# Supplementary material for: Ivabradine added to usual care in patients with heart failure: a systematic review with meta-analysis and trial sequential analysis
Source: HighWire-hosted journal article supplement (doi:10.1136/bmjebm-2021-111724), 2021-11-17
Supplement: bmjebm-2021-111724supp001_data_supplement.pdf [file bmjebm-2021-111724supp001_data_supplement.pdf]

## **Ivabradine added to usual care in patients with heart failure: a systematic review with meta-analysis and Trial Sequential Analysis – supplementary material**

Mathias Maagaard<sup>1,\*</sup>, Emil Eik Nielsen<sup>1,2</sup>, Naqash Javaid Sethi<sup>1</sup>, Ning Liang<sup>3,4</sup>, Si-Hong Yang<sup>4</sup>, Christian Gluud<sup>1,5</sup>; Janus Christian Jakobsen<sup>1,5</sup>

<sup>1</sup> Copenhagen Trial Unit, Centre for Clinical Intervention Research, The Capital Region, Copenhagen University Hospital - Rigshospitalet, Copenhagen, Denmark

<sup>2</sup> Department of Cardiology, The Zealand Region, Holbæk Hospital, Holbæk, Denmark

<sup>3</sup> Institute of Basic Research in Clinical Medicine, China Academy of Chinese Medical Sciences, Beijing, China

<sup>4</sup> Centre for Evidence-Based Chinese Medicine, Beijing University of Chinese Medicine, Beijing, China

<sup>5</sup> Department of Regional Health Research, The Faculty of Health Sciences, University of Southern Denmark, Odense, Denmark

\*Corresponding author

Mathias Maagaard

Phone: +45 35 45 71 76

Email: [mathias.maagaard@ctu.dk](mailto:mathias.maagaard@ctu.dk) /// [mathias.maagaard@gmail.com](mailto:mathias.maagaard@gmail.com)

Address: Copenhagen Trial Unit, Centre for Clinical Intervention Research, Rigshospitalet, Copenhagen University Hospital, Blegdamsvej 9, DK-2100 Copenhagen Ø, Denmark

## Supplement 1 – List of databases

- Cochrane Central Register of Controlled Trials (CENTRAL)
- Medical Literature Analysis and Retrieval System Online (MEDLINE)
- Excerpta Medica database (EMBASE)
- Latin American and Caribbean Health Sciences Literature (LILACS)
- Web of Science Core Collection
- Web of Science BIOSIS
- ClinicalTrials.gov
- Google Scholar
- European Medicines Agency (EMA), United States Food and Drug Administration (FDA)
- China Food and Drug Administration (CFDA)
- Medicines and Healthcare products Regulatory Agency
- World Health Organization (WHO)
- International Clinical Trials Registry Platform (ICTRP)
- Chinese Biomedical Literature Database (CBM)
- Wanfang, China National Knowledge Infrastructure (CNKI)
- Chinese Science Journal Database (VIP)

## Supplement 2 – Search strategy

### MEDLINE 31/05/2021, n = 422

1. (ivabradin\* or corlanor or procoralan or corlentor).af
2. (random\* or blind\* or placebo\* or meta-analys\* or systematic review).af.
3. 1 and 2

### EMBASE 31/05/2021, n = 1401

4. (ivabradin\* or corlanor or procoralan or corlentor).af
5. (random\* or blind\* or placebo\* or meta-analys\* or systematic review).af.
6. 1 and 2

### Web of Science Core Collection 31/05/2021, n = 633

1. (ivabradin\* or corlanor or procoralan or corlentor) all fields
2. (random\* or blind\* or placebo\* or meta-analys\* or systematic review) all fields
3. 1 and 2

### Web of Science BIOSIS previews 31/05/2021, n = 50

1. TI=(ivabradin\* or corlanor or procoralan or corlentor)
2. TI=(random\* or blind\* or placebo\* or meta-analys\* or systematic review)
3. 1 and 2

### LILACS 31/05/2021, n = 25

1. Ivabradine
2. Ivabradina
3. 1 or 2

### CENTRAL 31/05/2021, n = 638

1. (Ivabradin\* or corlanor or Procoralan or corlentor)

**EudraCT 31/05/2021, n = 46**

1. ivabradine OR corlanor OR procoralan OR corlentor

**ClinicalTrials.gov 31/05/2021, n = 80**

1. Ivabradine (also searched for Procoralan Corlanor, Ivabradin, Corlentor, S 16257)
2. Interventional studies

**Chinese Biomedical Literature Database (CBM/Sinomed), n = 140**

#1 (((“伊伐布雷定”[全字段:智能]) OR “可兰特”[全字段:智能]) OR “依伐布雷定”[全字段:智能]) OR “伊法布雷定”[全字段:智能]

#2 (“心衰”[全字段:智能]) OR “心脏衰竭”[全字段:智能]) OR “心力衰竭”[全字段:智能]

#3 (((“冠状动脉”[全字段:智能]) OR “冠脉疾病”[全字段:智能]) OR “冠脉病”[全字段:智能]) OR “冠心病”[全字段:智能]

#4 ((((((“心绞痛”[全字段:智能]) OR “心肌梗死”[全字段:智能]) OR “心肌梗塞”[全字段:智能]) OR “心肌缺血”[全字段:智能]) OR “缺血性心肌病”[全字段:智能]) OR “心源性水肿”[全字段:智能]) OR “心肾综合征”[全字段:智能]

#5 (#4) OR (#3) OR (#2)

#6 (((((((“随机”[全字段:智能]) OR “meta-分析”[全字段:智能]) OR “meta分析”[全字段:智能]) OR “系统综述”[全字段:智能]) OR “荟萃分析”[全字段:智能]) OR “系统评价”[全字段:智能]) OR “安慰剂”[全字段:智能]) OR “盲法”[全字段:智能]

#7 (#6) OR (#5) OR (#1)

**Chinese Science Journal Database (VIP), n = 165**

(U=伊伐布雷定 OR 可兰特 OR 依伐布雷定 OR 伊法布雷定) AND (U=(心衰 OR 心脏衰竭 OR 心力衰竭 OR 心源性水肿 OR 心肾综合征 OR 冠状动脉 OR 冠心病 OR 冠脉病 OR 冠脉疾病 OR 心肌缺血 OR 缺血性心肌病 OR 心绞痛 OR 心肌梗死 OR 心肌梗塞 OR 心功能不全) OR R=(心衰 OR 心脏衰竭 OR 心力衰竭 OR 心源性水肿 OR 心肾综合征 OR 冠状动脉 OR 冠心病 OR 冠脉病 OR 冠脉疾病 OR 心肌缺血 OR 缺血性心肌病 OR 心绞痛 OR 心肌梗死 OR 心肌梗塞 OR 心功能不全)) AND (R=(随机 OR meta-分析 OR meta分析 OR 荟萃分析 OR 系统评价

OR 系统综述 OR 安慰剂 OR 盲法) OR U=(随机 OR meta-分析 OR meta分析 OR 荟萃分析 OR 系统评价 OR 系统综述 OR 安慰剂 OR 盲法))

### **China National Knowledge Infrastructure (CNKI), n = 255**

SU=('伊伐布雷定'+ '可兰特'+ '依伐布雷定'+ '伊法布雷定') AND SU=('心衰'+ '心脏衰竭'+ '心力衰竭'+ '心源性水肿'+ '心肾综合征'+ '冠状动脉\*'+ '冠心病'+ '冠脉病'+ '冠脉疾病'+ '心肌缺血'+ '缺血性心肌病'+ '心绞痛'+ '心肌梗死'+ '心肌

### **Wanfang, n = 200**

主题:(伊伐布雷定 + 可兰特 + 依伐布雷定 + 伊法布雷定) \* 主题:(心衰 + 心脏衰竭 + 心力衰竭 + 心源性水肿 + 心肾综合征 + 冠状动脉 + 冠心病 + 冠脉疾病 + 冠脉病 + 心肌缺血 + 心绞痛 + 心肌梗死 + 缺血性心肌病 + 心肌梗塞 + 心功能不全) \* 全部:(随机 + meta-分析 + meta分析 + 荟萃分析 + 系统评价 + 系统综述 + 安慰剂 + 盲法)

Supplement 3 – PRISMA flow chart

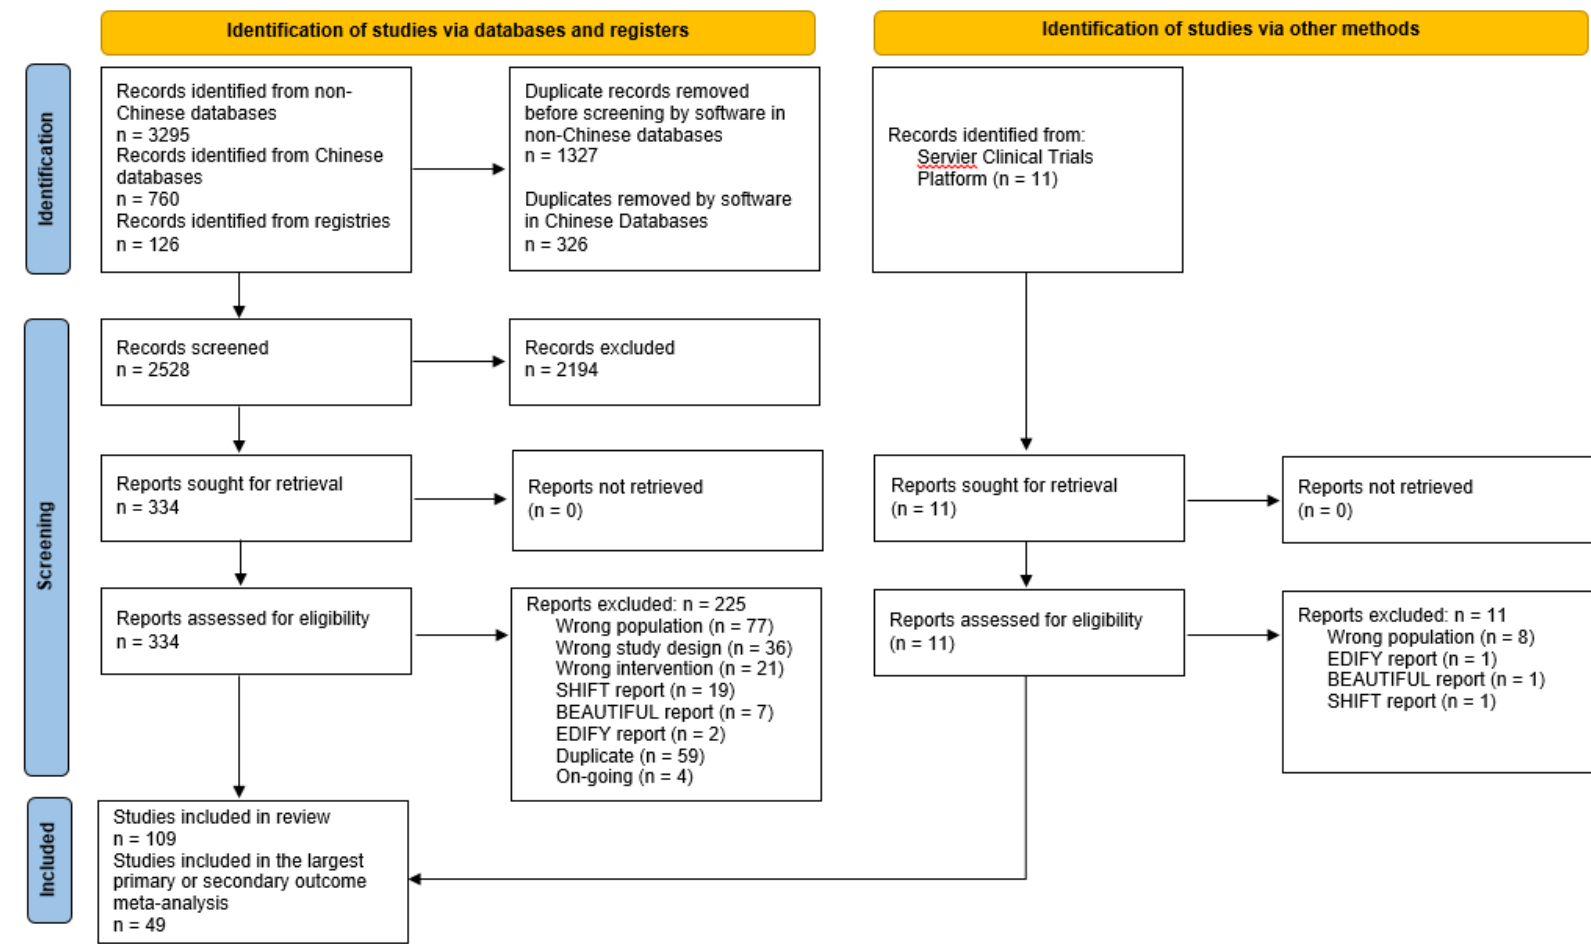

From: Page MJ, McKenzie JE, Bossuyt PM, Boutron I, Hoffmann TC, Mulrow CD, et al. The PRISMA 2020 statement: an updated guideline for reporting systematic reviews. *BMJ* 2021;372:n71. doi: 10.1136/bmj.n71. For more information, visit: <http://www.prisma-statement.org/>

Figure 1 – PRISMA flowchart.

Supplement 4 - Risk of bias

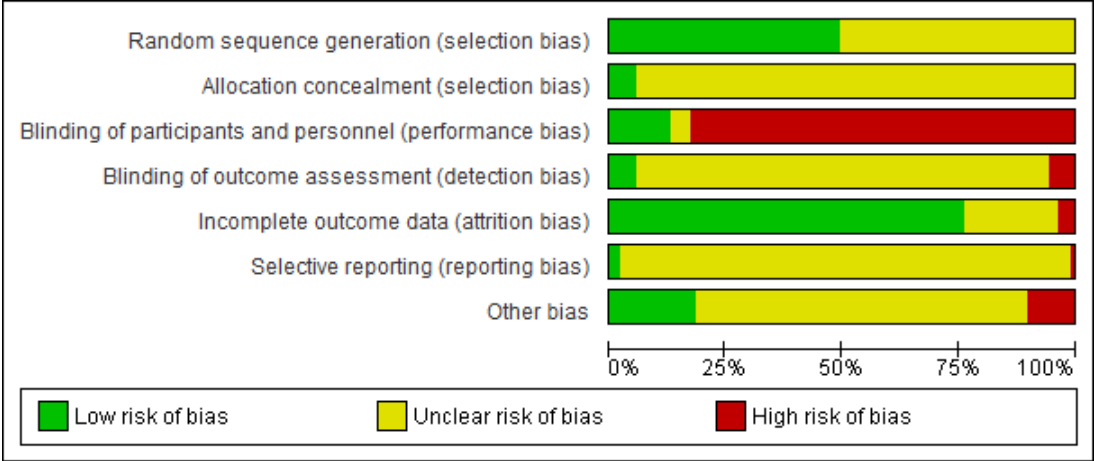

Figure 2 – Risk of bias graph.

|                    | Random sequence generation (selection bias) | Allocation concealment (selection bias) | Blinding of participants and personnel (performance bias) | Blinding of outcome assessment (detection bias) | Incomplete outcome data (attrition bias) | Selective reporting (reporting bias) | Other bias |
|--------------------|---------------------------------------------|-----------------------------------------|-----------------------------------------------------------|-------------------------------------------------|------------------------------------------|--------------------------------------|------------|
| Abdel-Hady 2011    | ?                                           | ?                                       | ?                                                         | ?                                               | ?                                        | ?                                    | ?          |
| Abdel-Salam 2015   | +                                           | ?                                       | +                                                         | ?                                               | +                                        | ?                                    | +          |
| Adamyman 2008      | ?                                           | ?                                       | -                                                         | ?                                               | ?                                        | ?                                    | ?          |
| Adamyman 2010      | ?                                           | ?                                       | -                                                         | ?                                               | ?                                        | ?                                    | ?          |
| Adamyman 2015      | ?                                           | ?                                       | -                                                         | ?                                               | ?                                        | ?                                    | ?          |
| Al Saadi 2013      | ?                                           | ?                                       | -                                                         | ?                                               | ?                                        | ?                                    | ?          |
| Aroutunov 2008     | ?                                           | ?                                       | -                                                         | ?                                               | ?                                        | ?                                    | ?          |
| Babushkina 2020    | ?                                           | ?                                       | -                                                         | ?                                               | +                                        | ?                                    | +          |
| Bansal 2019        | ?                                           | ?                                       | -                                                         | ?                                               | +                                        | ?                                    | ?          |
| Barilla 2016       | +                                           | ?                                       | -                                                         | -                                               | +                                        | ?                                    | +          |
| BEAUTIFUL 2008     | +                                           | +                                       | +                                                         | +                                               | +                                        | +                                    | +          |
| Bi 2020            | ?                                           | ?                                       | -                                                         | ?                                               | +                                        | ?                                    | ?          |
| Cao 2019           | +                                           | ?                                       | -                                                         | ?                                               | +                                        | ?                                    | +          |
| Cavosoglu 2015     | ?                                           | ?                                       | ?                                                         | ?                                               | +                                        | ?                                    | +          |
| Chaudhari 2014     | ?                                           | ?                                       | -                                                         | ?                                               | ?                                        | ?                                    | ?          |
| Chen 2021          | ?                                           | ?                                       | -                                                         | ?                                               | +                                        | ?                                    | ?          |
| Cheng 2017         | +                                           | ?                                       | -                                                         | ?                                               | +                                        | ?                                    | ?          |
| Chen G 2020        | ?                                           | ?                                       | -                                                         | ?                                               | +                                        | ?                                    | ?          |
| Chen HX 2021       | ?                                           | ?                                       | -                                                         | ?                                               | +                                        | ?                                    | ?          |
| Chumburidze 2013   | ?                                           | ?                                       | +                                                         | ?                                               | ?                                        | ?                                    | ?          |
| Cong 2018          | +                                           | ?                                       | -                                                         | -                                               | +                                        | ?                                    | -          |
| CONSTATHE-DHF 2016 | +                                           | +                                       | +                                                         | +                                               | +                                        | ?                                    | -          |
| Deng 2017          | ?                                           | ?                                       | -                                                         | ?                                               | +                                        | ?                                    | ?          |
| Di 2020            | +                                           | ?                                       | -                                                         | ?                                               | ?                                        | ?                                    | ?          |
| EDIFY 2017         | ?                                           | ?                                       | +                                                         | +                                               | -                                        | -                                    | -          |
| Fu 2021            | ?                                           | ?                                       | -                                                         | ?                                               | +                                        | ?                                    | ?          |
| Gou 2017           | +                                           | ?                                       | -                                                         | ?                                               | +                                        | ?                                    | ?          |

|                   | Random sequence generation (selection bias) | Allocation concealment (selection bias) | Blinding of participants and personnel (performance bias) | Blinding of outcome assessment (detection bias) | Incomplete outcome data (attrition bias) | Selective reporting (reporting bias) | Other bias |
|-------------------|---------------------------------------------|-----------------------------------------|-----------------------------------------------------------|-------------------------------------------------|------------------------------------------|--------------------------------------|------------|
| Guo 2017          | +                                           | ?                                       | -                                                         | ?                                               | +                                        | ?                                    | ?          |
| He 2019           | +                                           | ?                                       | -                                                         | ?                                               | -                                        | ?                                    | +          |
| Hu 2017           | ?                                           | ?                                       | -                                                         | ?                                               | +                                        | ?                                    | ?          |
| Hu 2018           | ?                                           | ?                                       | -                                                         | ?                                               | +                                        | ?                                    | ?          |
| Huang J 2017      | +                                           | ?                                       | -                                                         | ?                                               | +                                        | ?                                    | ?          |
| Kosmala 2013      | +                                           | ?                                       | +                                                         | ?                                               | +                                        | ?                                    | +          |
| Li 2018           | +                                           | ?                                       | -                                                         | ?                                               | +                                        | ?                                    | ?          |
| Li 2020           | +                                           | ?                                       | -                                                         | ?                                               | +                                        | ?                                    | ?          |
| Li B 2020         | ?                                           | ?                                       | -                                                         | ?                                               | +                                        | ?                                    | ?          |
| Liu 2019          | +                                           | ?                                       | -                                                         | ?                                               | +                                        | ?                                    | ?          |
| Liu 2020          | +                                           | ?                                       | -                                                         | ?                                               | +                                        | ?                                    | ?          |
| Liu Y 2020        | +                                           | ?                                       | +                                                         | ?                                               | +                                        | ?                                    | ?          |
| Lu 2019           | +                                           | ?                                       | -                                                         | ?                                               | -                                        | ?                                    | -          |
| Lu 2020           | +                                           | ?                                       | -                                                         | ?                                               | +                                        | ?                                    | ?          |
| Luo 2021          | +                                           | ?                                       | -                                                         | ?                                               | +                                        | ?                                    | ?          |
| Ma 2016           | ?                                           | ?                                       | +                                                         | ?                                               | +                                        | ?                                    | ?          |
| Ma 2020           | +                                           | ?                                       | -                                                         | ?                                               | +                                        | ?                                    | +          |
| Mansour 2011      | +                                           | ?                                       | -                                                         | -                                               | +                                        | ?                                    | +          |
| Manz 2003         | ?                                           | ?                                       | -                                                         | +                                               | +                                        | ?                                    | -          |
| Mao 2018          | +                                           | ?                                       | -                                                         | ?                                               | +                                        | ?                                    | ?          |
| Masi de Luca 2018 | ?                                           | ?                                       | ?                                                         | ?                                               | ?                                        | ?                                    | ?          |
| Moiseev 2011      | ?                                           | ?                                       | -                                                         | ?                                               | ?                                        | ?                                    | ?          |
| Nguyen 2018       | +                                           | ?                                       | +                                                         | -                                               | ?                                        | ?                                    | -          |
| Ordu 2015         | ?                                           | ?                                       | -                                                         | ?                                               | +                                        | ?                                    | ?          |
| Pal 2015          | ?                                           | ?                                       | +                                                         | ?                                               | +                                        | ?                                    | +          |
| Pan 2020          | +                                           | ?                                       | -                                                         | ?                                               | +                                        | ?                                    | +          |
| Potapenko 2011    | ?                                           | ?                                       | -                                                         | ?                                               | ?                                        | ?                                    | ?          |



|                  | Random sequence generation (selection bias) | Allocation concealment (selection bias) | Blinding of participants and personnel (performance bias) | Blinding of outcome assessment (detection bias) | Incomplete outcome data (attrition bias) | Selective reporting (reporting bias) | Other bias |
|------------------|---------------------------------------------|-----------------------------------------|-----------------------------------------------------------|-------------------------------------------------|------------------------------------------|--------------------------------------|------------|
| Qi 2019          | +                                           | ?                                       | +                                                         | ?                                               | +                                        | ?                                    | ?          |
| Raja 2017        | +                                           | ?                                       | +                                                         | +                                               | +                                        | ?                                    | +          |
| Sallam 2016      | ?                                           | ?                                       | ?                                                         | ?                                               | +                                        | ?                                    | +          |
| Sarullo 2010     | +                                           | +                                       | +                                                         | ?                                               | ?                                        | ?                                    | +          |
| Shen 2018        | +                                           | ?                                       | +                                                         | ?                                               | +                                        | ?                                    | ?          |
| SHIFT 2010       | +                                           | +                                       | +                                                         | +                                               | +                                        | +                                    | +          |
| Sisakian 2015    | ?                                           | ?                                       | +                                                         | ?                                               | +                                        | ?                                    | ?          |
| Song 2021        | +                                           | ?                                       | +                                                         | ?                                               | +                                        | ?                                    | +          |
| Su 2020          | ?                                           | ?                                       | +                                                         | ?                                               | +                                        | ?                                    | +          |
| Su DL 2020       | +                                           | ?                                       | +                                                         | ?                                               | +                                        | ?                                    | +          |
| Sun 2020         | ?                                           | ?                                       | +                                                         | ?                                               | +                                        | ?                                    | ?          |
| Sun 2021         | +                                           | ?                                       | +                                                         | ?                                               | +                                        | ?                                    | ?          |
| Tang 2018        | +                                           | ?                                       | +                                                         | ?                                               | +                                        | ?                                    | +          |
| Tarlovskaya 2011 | ?                                           | ?                                       | ?                                                         | ?                                               | ?                                        | ?                                    | ?          |
| Tatarchenko 2008 | ?                                           | ?                                       | +                                                         | ?                                               | ?                                        | ?                                    | +          |
| Tsutsui 2016     | ?                                           | ?                                       | +                                                         | ?                                               | +                                        | ?                                    | +          |
| Tsutsui 2019     | +                                           | +                                       | +                                                         | +                                               | +                                        | ?                                    | +          |
| Tumasyan 2009    | ?                                           | ?                                       | +                                                         | ?                                               | ?                                        | ?                                    | ?          |
| Tumasyan 2012    | ?                                           | ?                                       | +                                                         | ?                                               | ?                                        | ?                                    | ?          |
| Tumasyan 2016    | ?                                           | ?                                       | +                                                         | ?                                               | ?                                        | ?                                    | ?          |
| Tumasyan 2017    | ?                                           | ?                                       | +                                                         | ?                                               | ?                                        | ?                                    | ?          |
| Tumasyan 2018    | ?                                           | ?                                       | +                                                         | ?                                               | ?                                        | ?                                    | ?          |
| Vatinian 2015    | ?                                           | ?                                       | +                                                         | ?                                               | ?                                        | ?                                    | ?          |
| Wang 2019        | +                                           | ?                                       | +                                                         | ?                                               | +                                        | ?                                    | ?          |
| Wang FC 2017     | +                                           | ?                                       | +                                                         | ?                                               | +                                        | ?                                    | ?          |
| Wang GK 2020     | ?                                           | ?                                       | +                                                         | ?                                               | +                                        | ?                                    | ?          |
| Wang JJ 2017     | +                                           | ?                                       | +                                                         | ?                                               | +                                        | ?                                    | ?          |

red

**Figure 3 – Risk of bias summary.** Green circles = low risk of bias; yellow circles = unclear risk of bias; red circles = high risk of bias.

|               | Random sequence generation (selection bias) | Allocation concealment (selection bias) | Blinding of participants and personnel (performance bias) | Blinding of outcome assessment (detection bias) | Incomplete outcome data (attrition bias) | Selective reporting (reporting bias) | Other bias |
|---------------|---------------------------------------------|-----------------------------------------|-----------------------------------------------------------|-------------------------------------------------|------------------------------------------|--------------------------------------|------------|
| Wang LJ 2020  | +                                           | ?                                       | +                                                         | ?                                               | +                                        | ?                                    | ?          |
| Wang Q 2017   | ?                                           | ?                                       | +                                                         | ?                                               | +                                        | ?                                    | ?          |
| Wang RM 2017  | ?                                           | ?                                       | +                                                         | ?                                               | +                                        | ?                                    | ?          |
| Wang YH 2018  | ?                                           | ?                                       | +                                                         | ?                                               | +                                        | ?                                    | ?          |
| Wei 2019      | +                                           | ?                                       | +                                                         | ?                                               | +                                        | ?                                    | ?          |
| Xia 2016      | +                                           | ?                                       | +                                                         | ?                                               | +                                        | ?                                    | ?          |
| Xing 2018     | ?                                           | ?                                       | +                                                         | ?                                               | +                                        | ?                                    | ?          |
| Xu 2019       | ?                                           | ?                                       | +                                                         | ?                                               | +                                        | ?                                    | ?          |
| Xu 2020       | +                                           | ?                                       | +                                                         | ?                                               | +                                        | ?                                    | ?          |
| Xue 2020      | ?                                           | ?                                       | +                                                         | ?                                               | +                                        | ?                                    | ?          |
| Yang WT 2019  | +                                           | ?                                       | +                                                         | ?                                               | +                                        | ?                                    | ?          |
| Yang Z 2019   | ?                                           | ?                                       | +                                                         | ?                                               | +                                        | ?                                    | ?          |
| Yao 2016      | ?                                           | ?                                       | +                                                         | ?                                               | +                                        | ?                                    | ?          |
| Yi 2017       | ?                                           | ?                                       | +                                                         | ?                                               | +                                        | ?                                    | ?          |
| Yu 2018       | ?                                           | ?                                       | +                                                         | ?                                               | +                                        | ?                                    | ?          |
| Yu 2019       | +                                           | ?                                       | +                                                         | ?                                               | +                                        | ?                                    | ?          |
| Yue 2016      | ?                                           | ?                                       | +                                                         | ?                                               | +                                        | ?                                    | ?          |
| Zeng FC 2019  | +                                           | ?                                       | +                                                         | ?                                               | +                                        | ?                                    | ?          |
| Zeng XM 2019  | +                                           | ?                                       | +                                                         | ?                                               | +                                        | ?                                    | ?          |
| Zhang 2019    | ?                                           | ?                                       | +                                                         | ?                                               | +                                        | ?                                    | ?          |
| Zhang 2020    | +                                           | ?                                       | +                                                         | ?                                               | +                                        | ?                                    | ?          |
| Zhang 2021    | +                                           | ?                                       | +                                                         | ?                                               | +                                        | ?                                    | +          |
| Zhang J 2019  | +                                           | +                                       | +                                                         | ?                                               | +                                        | ?                                    | +          |
| Zhang XJ 2019 | +                                           | ?                                       | +                                                         | ?                                               | +                                        | ?                                    | ?          |
| Zhang Y 2020  | +                                           | ?                                       | +                                                         | ?                                               | +                                        | ?                                    | ?          |
| Zhao 2020     | +                                           | ?                                       | +                                                         | ?                                               | +                                        | ?                                    | ?          |
| Zhou 2019     | ?                                           | ?                                       | +                                                         | ?                                               | +                                        | ?                                    | ?          |
| Zhou 2020     | +                                           | ?                                       | +                                                         | ?                                               | +                                        | ?                                    | ?          |

## Supplement 5 - All-cause mortality

### Main analyses

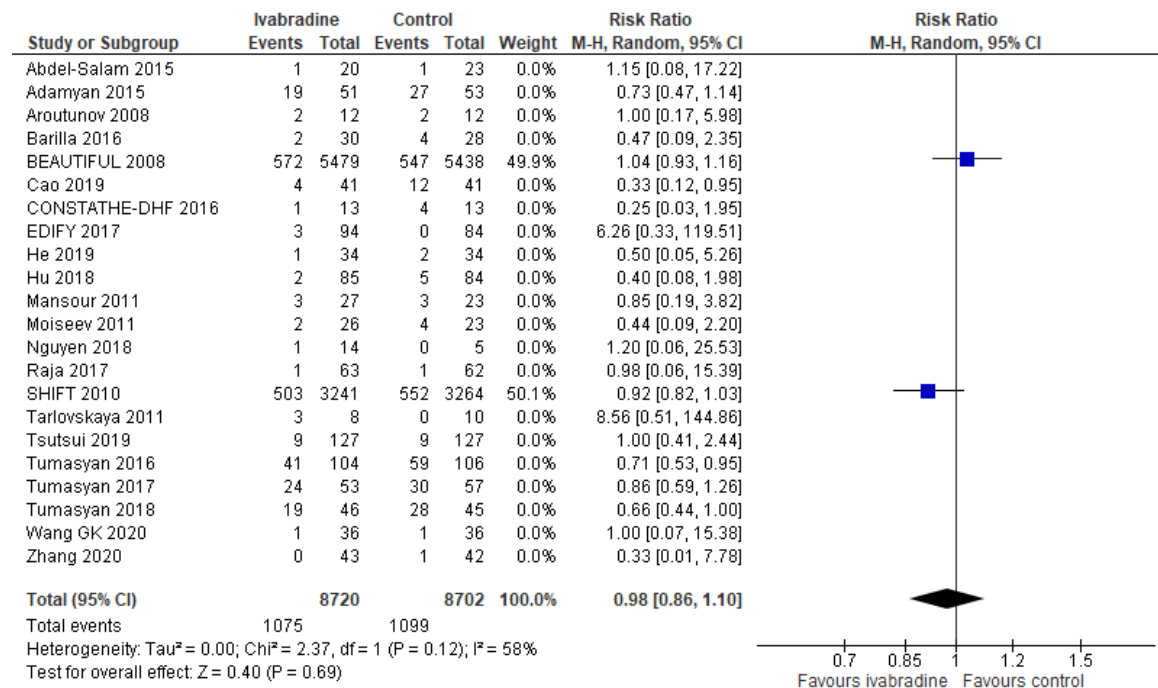

**Figure 4 – Forest plot of the meta-analysis of all-cause mortality using random-effects meta-analysis including only trials at low risk of bias, except for for-profit bias.** The meta-analysis showed no evidence of an difference between ivabradine versus placebo.

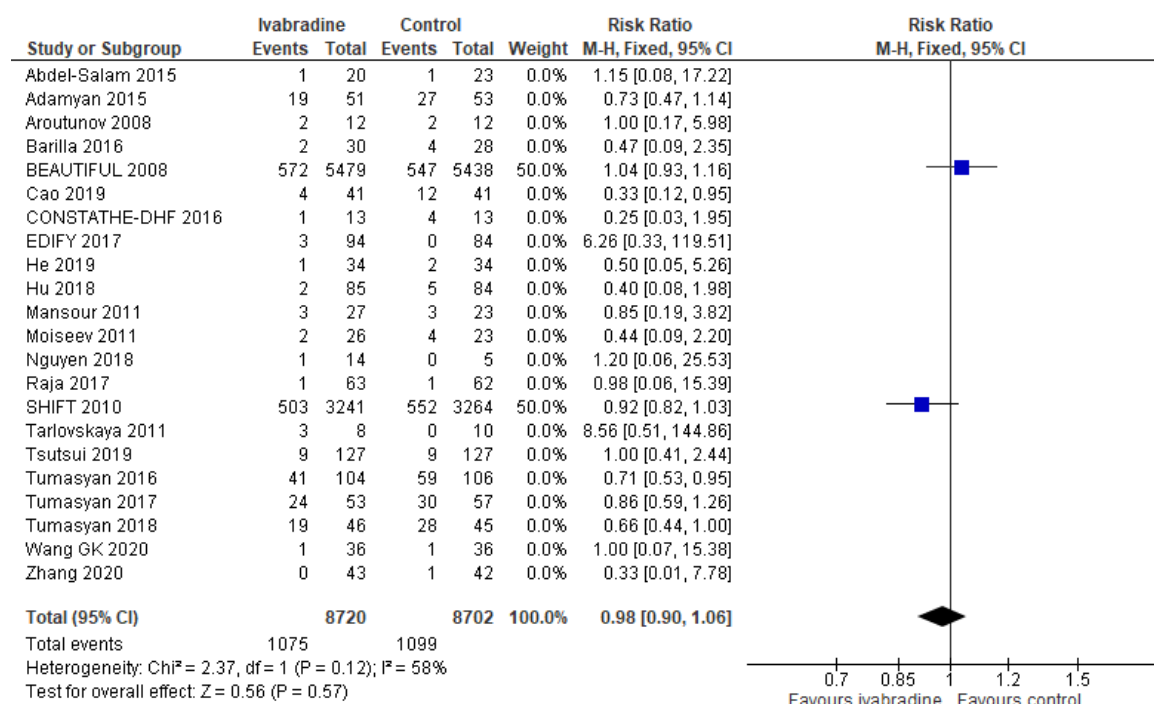

**Figure 5 – Forest plot of the meta-analysis of all-cause mortality using fixed-effect meta-analysis including only trials at low risk of bias, except for for-profit bias.** The meta-analysis showed no evidence of a difference between ivabradine versus placebo.

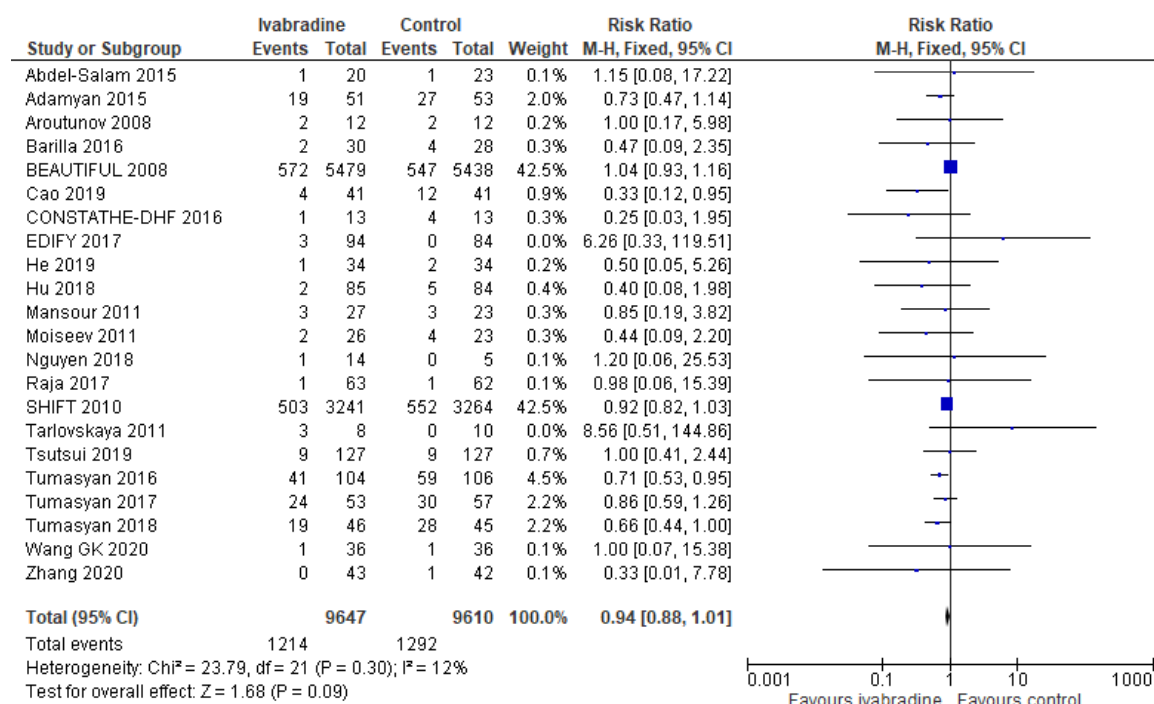

**Figure 6 - Forest plot of the meta-analysis of all-cause mortality using fixed-effect meta-analysis.** The meta-analysis showed no evidence of a difference between ivabradine versus control (placebo or no intervention).

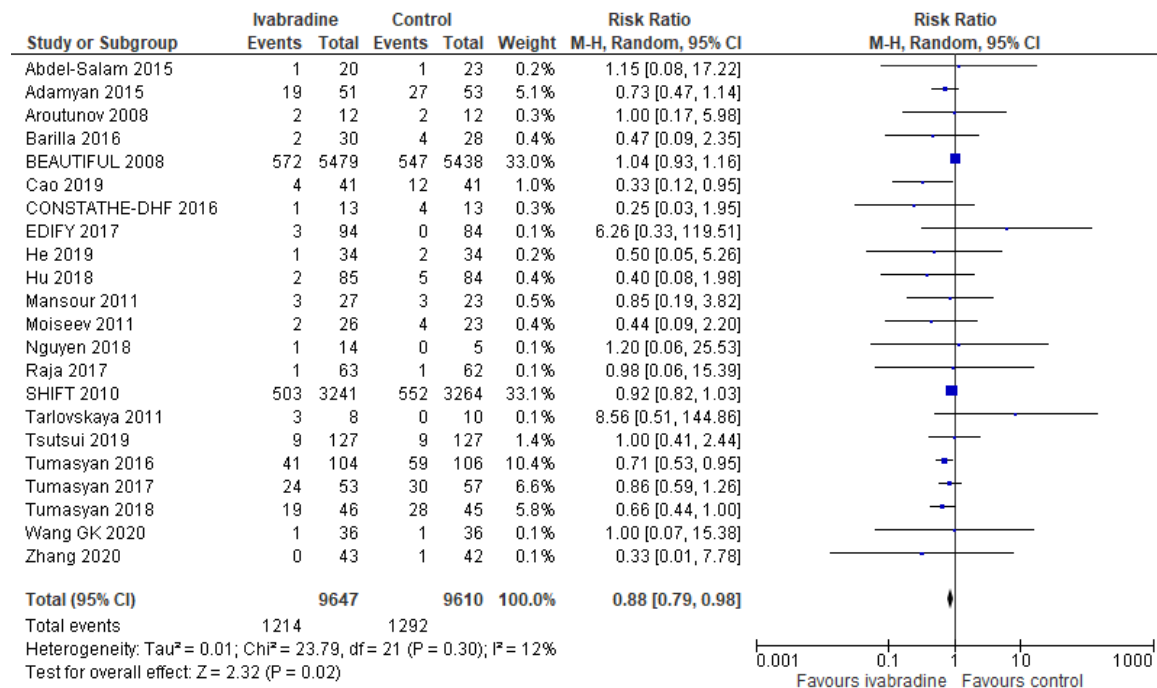

**Figure 7 - Forest plot of the meta-analysis of all-cause mortality using random-effects meta-analysis.** The meta-analysis showed evidence of a beneficial effect of ivabradine versus control (placebo or no intervention).

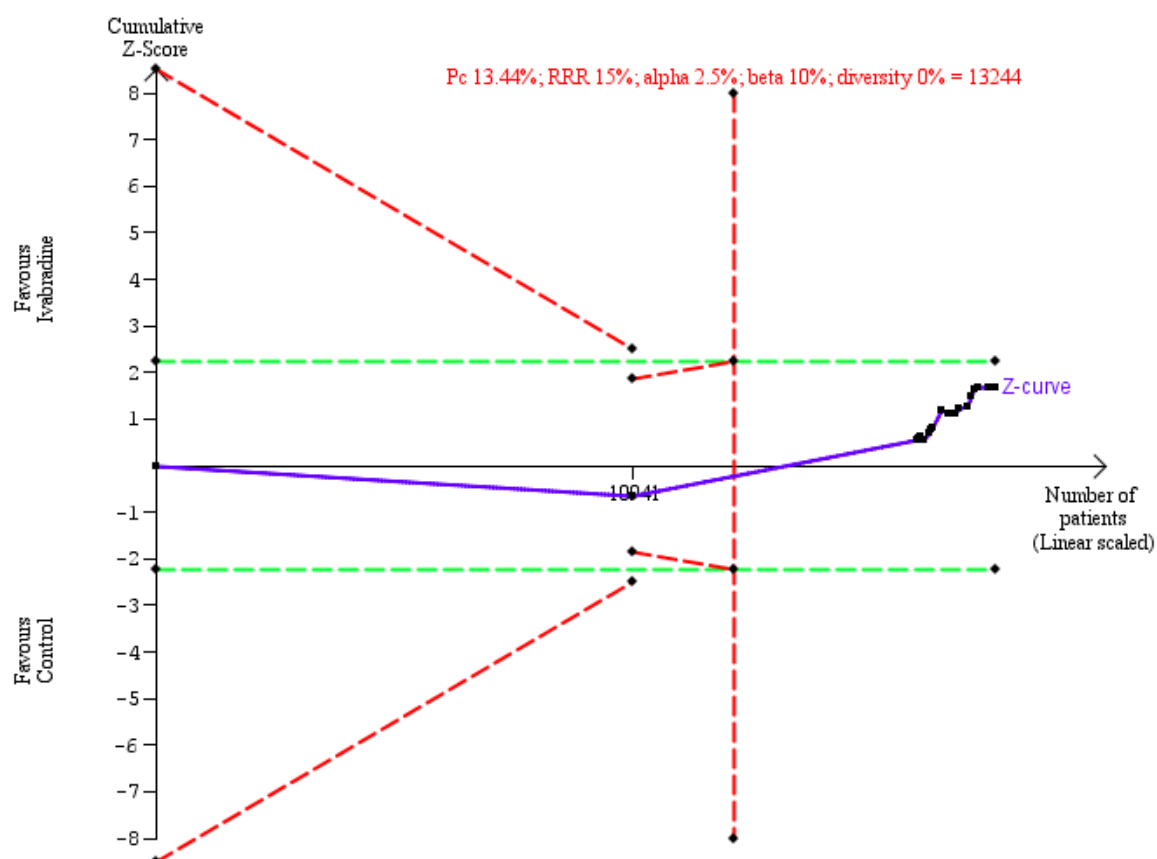

**Figure 8 - Trial Sequential Analysis graph of all-cause mortality.** Trial Sequential Analysis showed that we had enough information to reject a relative risk reduction of 15% or more by ivabradine versus control (placebo or no intervention). The cumulative z-curve (the blue line) breaches the boundary of futility and the required information size. Pc: prevalence in control group; RRR: relative risk ratio.

*Sensitivity analyses*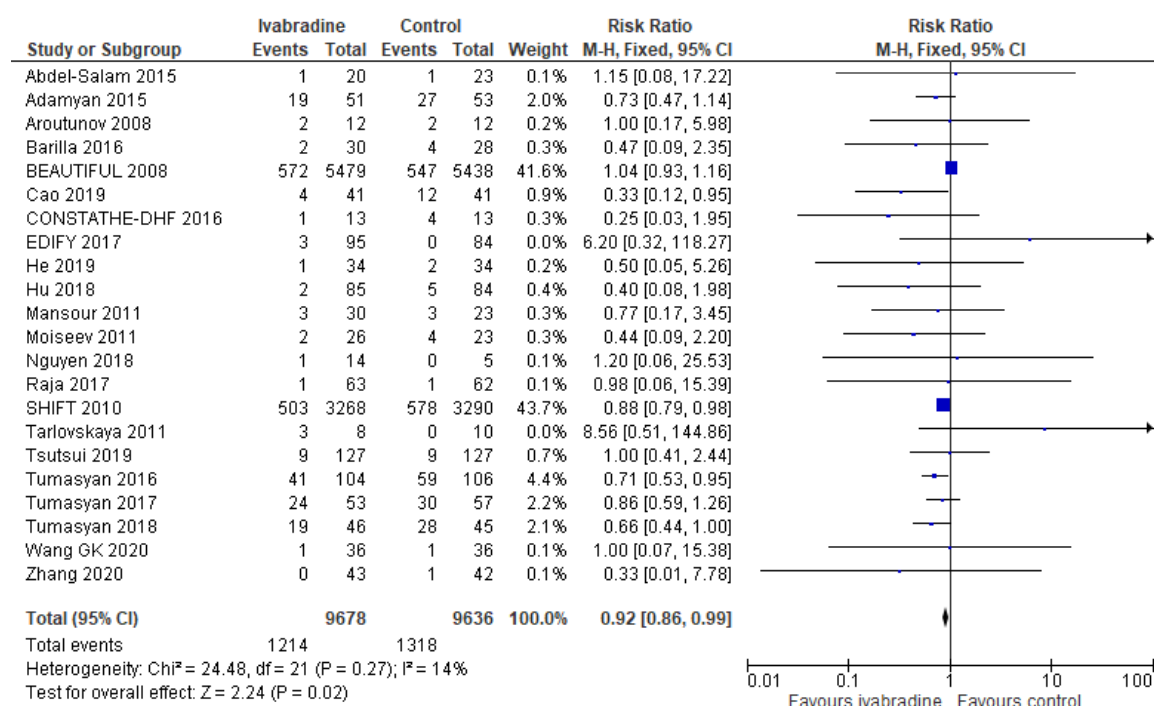

Figure 9 - Forest plot of the sensitivity analysis of all-cause mortality using best- compared with worst-case scenario.

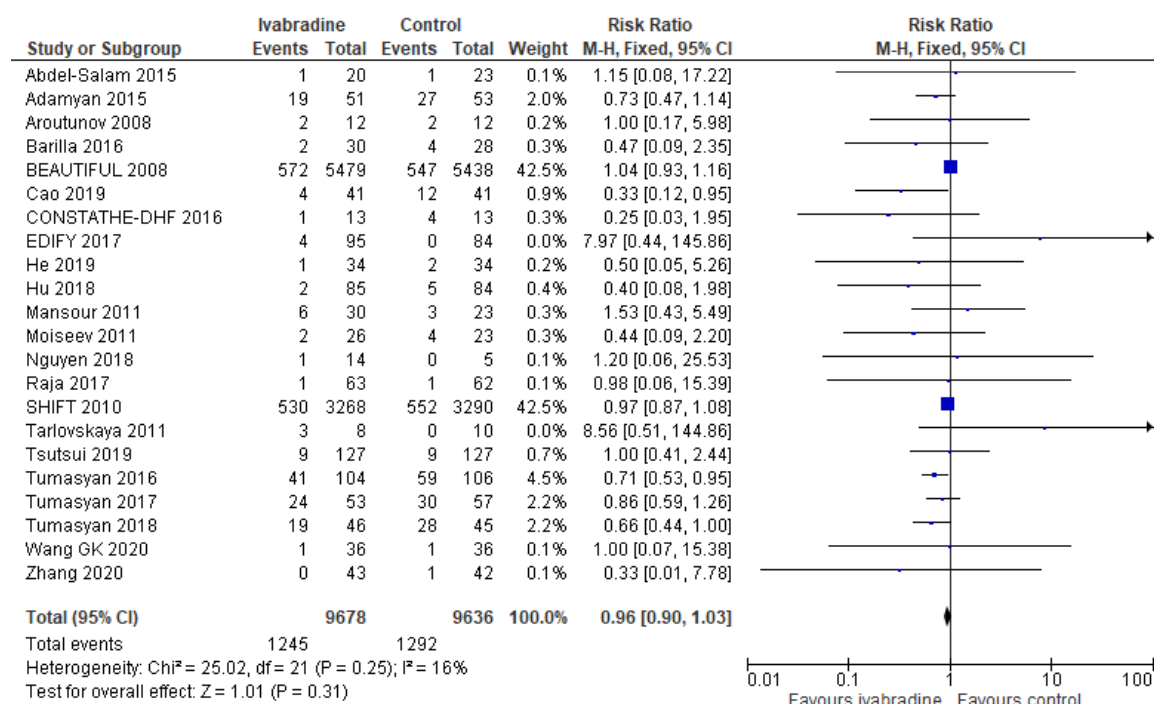

Figure 10 - Forest plot of the sensitivity analysis of all-cause mortality using worst- compared with best-case scenario.

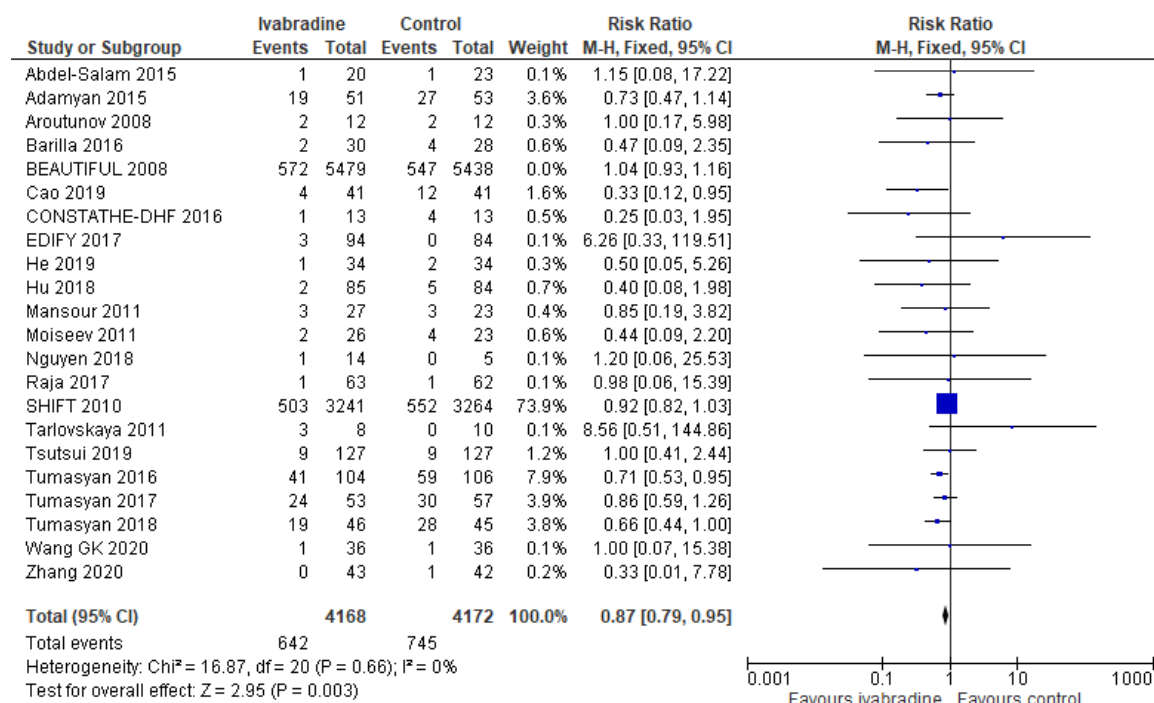

Figure 11 – Forest plot of the sensitivity analysis of all-cause mortality removing the BEAUTIFUL trial.



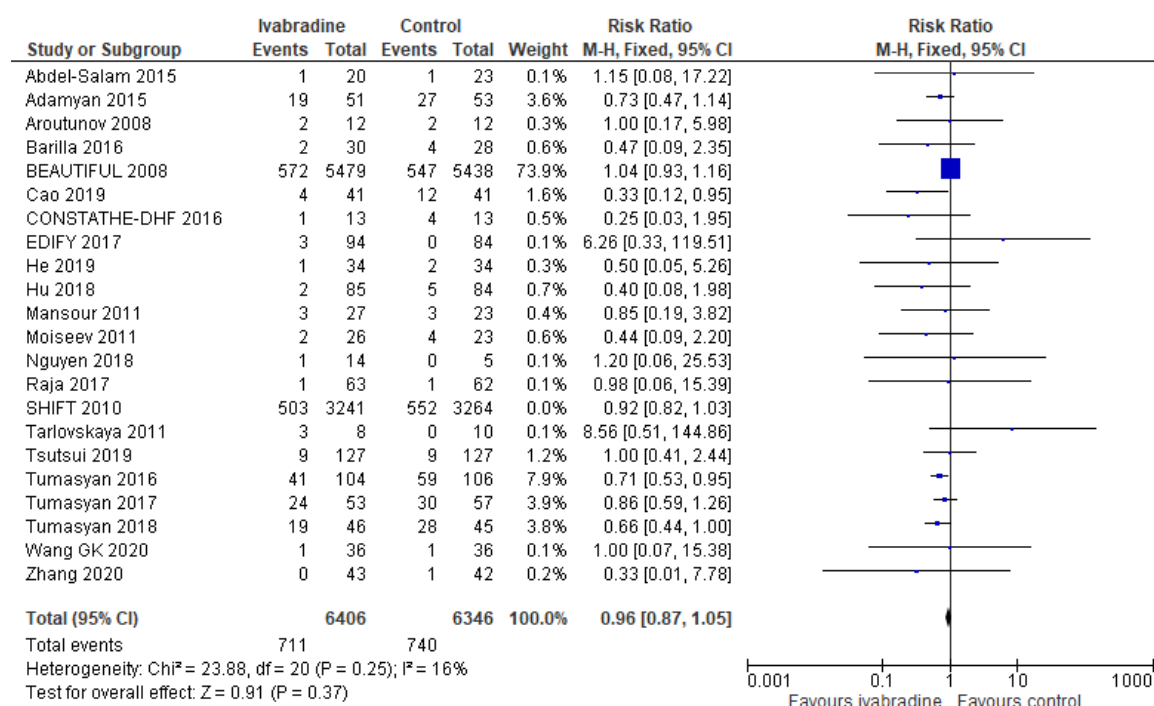

Figure 12 – Forest plot of the sensitivity analysis of all-cause mortality removing the SHIFT trial.

**Subgroup analyses**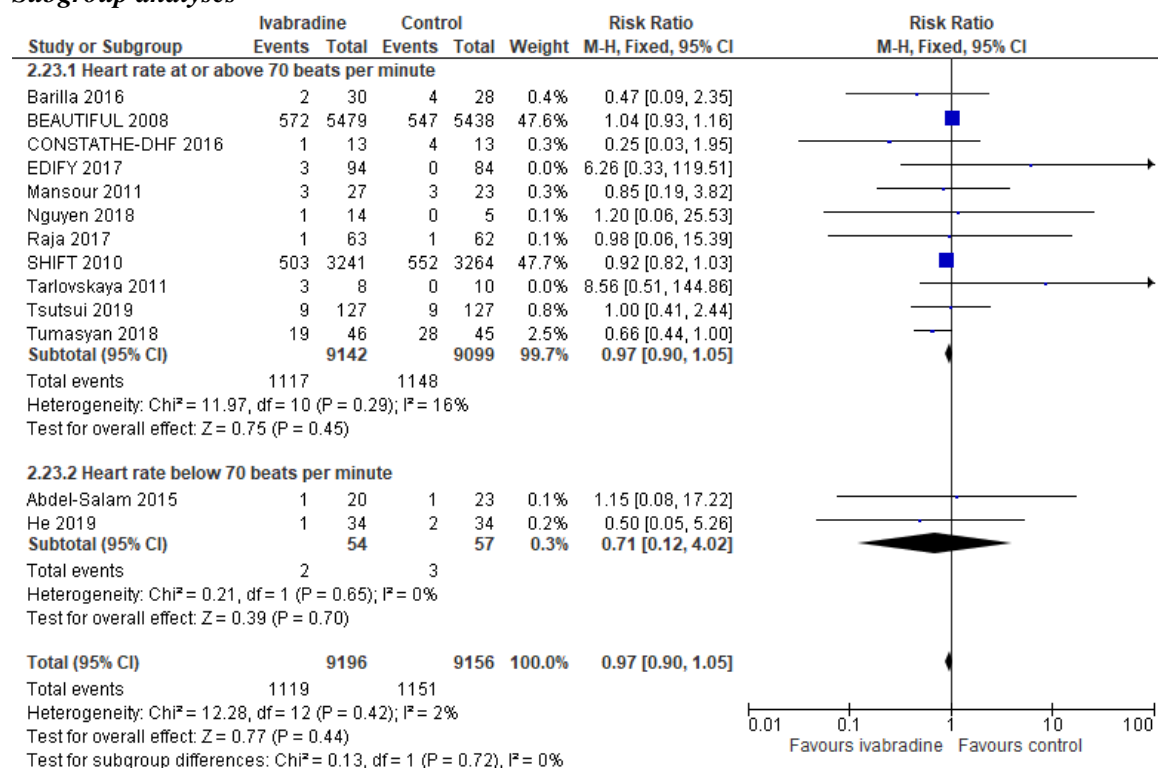

**Figure 13 – Forest plot of the subgroup analyses of trials randomising participants with a heart rate at or above 70 beats per minute compared to trials randomising participants with heart rate below 70 beats per minute on all-cause mortality.**

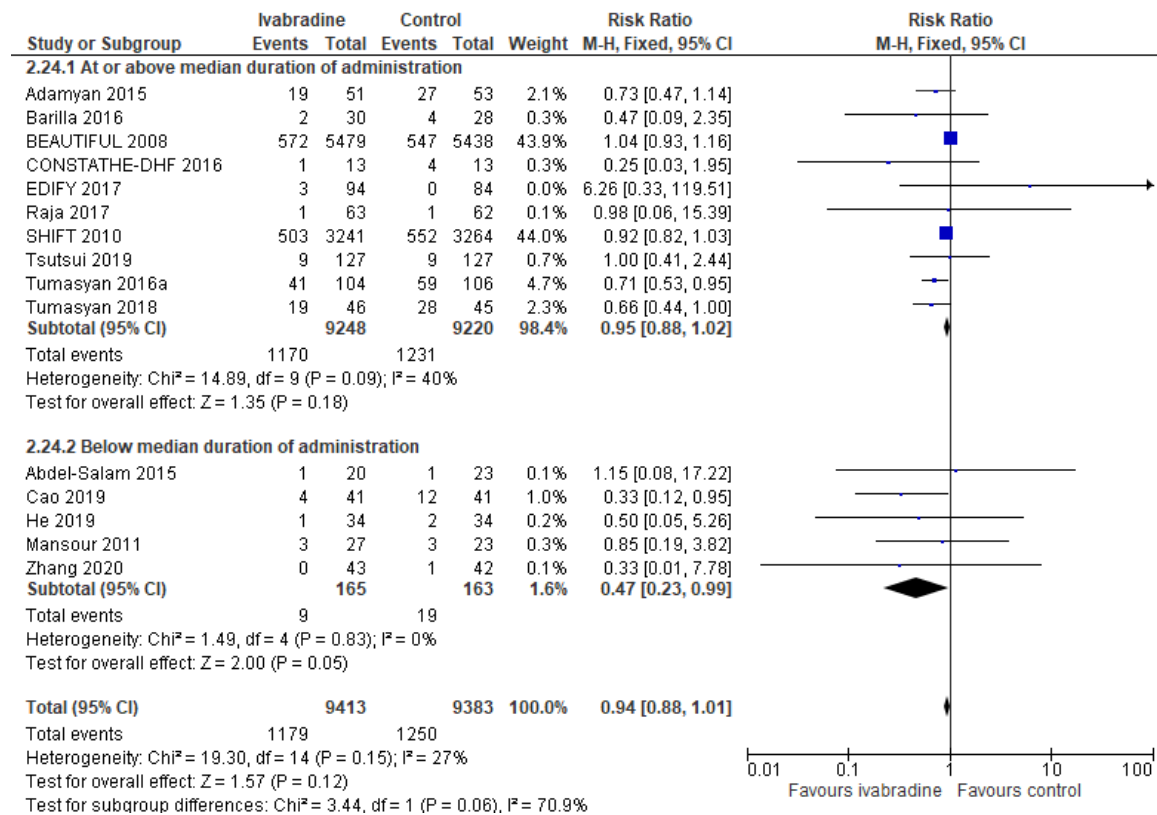

**Figure 14 - Forest plot of the subgroup analyses of trials administering ivabradine at or above median duration (182.64 days) versus trials administering ivabradine below median duration on all-cause mortality.**

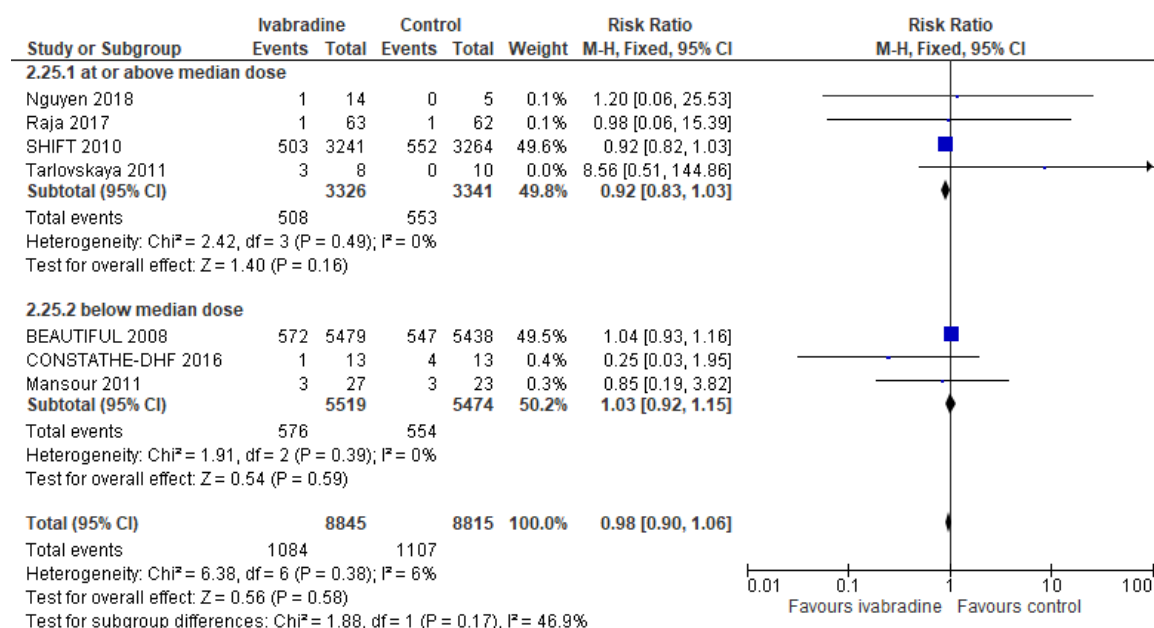

**Figure 15 - Forest plot of the subgroup analyses of trials administering ivabradine at or above median daily dose (12.7 mg) compared to trials administering ivabradine below median daily dose on all-cause mortality.**

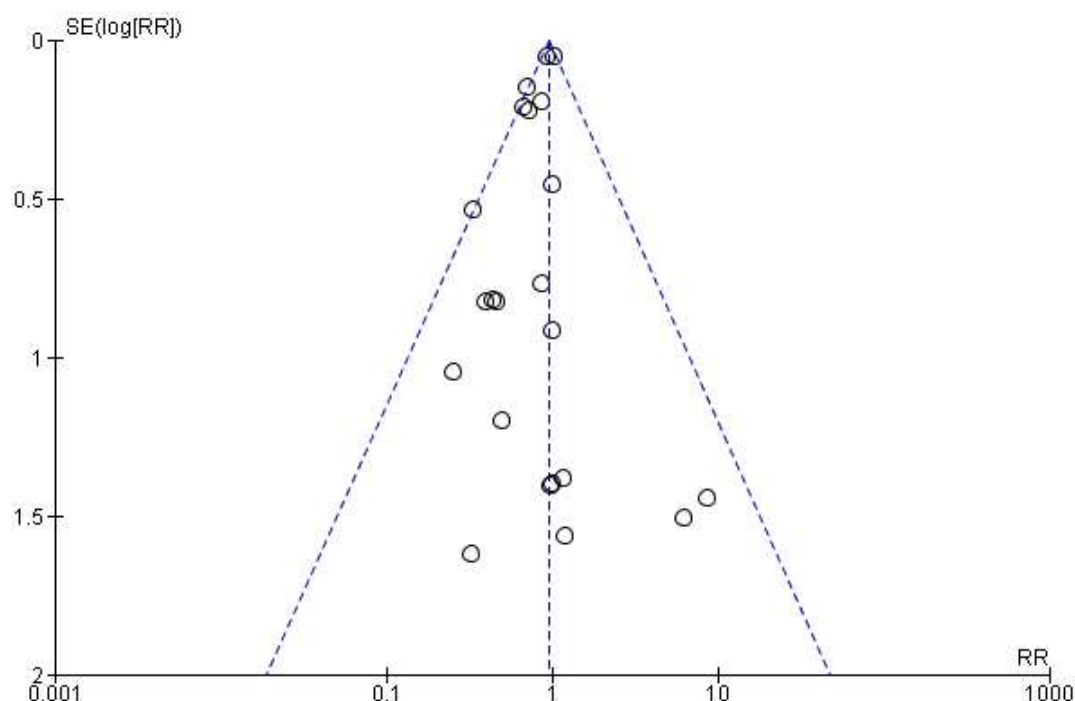

**Figure 16 – Funnel plot of the analyses of all-cause mortality. The funnel plot did not indicate small study bias.**

## Supplement 6 - Serious adverse events

### Main analyses

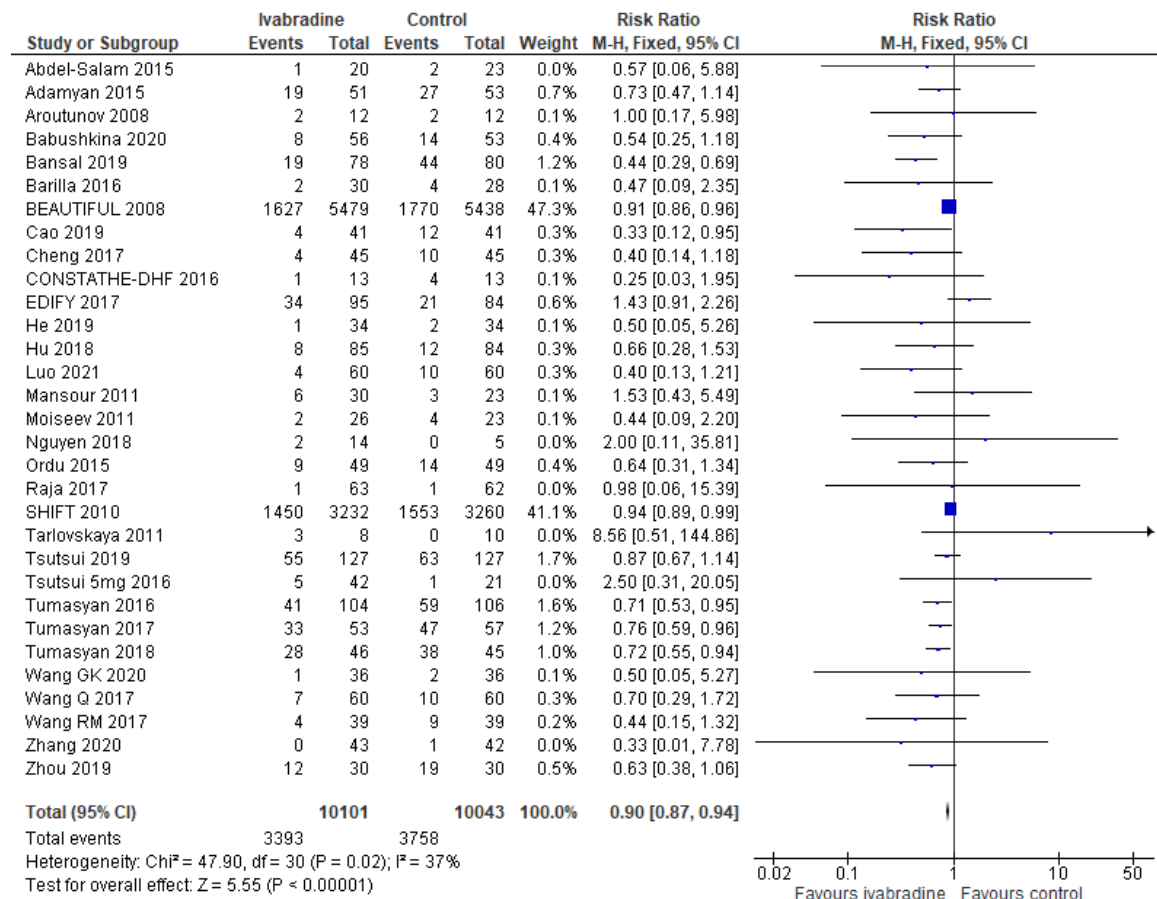

**Figure 17 - Forest plot of the meta-analysis of serious adverse events using fixed-effect meta-analysis.** The meta-analysis showed evidence of a beneficial effect of ivabradine versus control (placebo or no intervention).

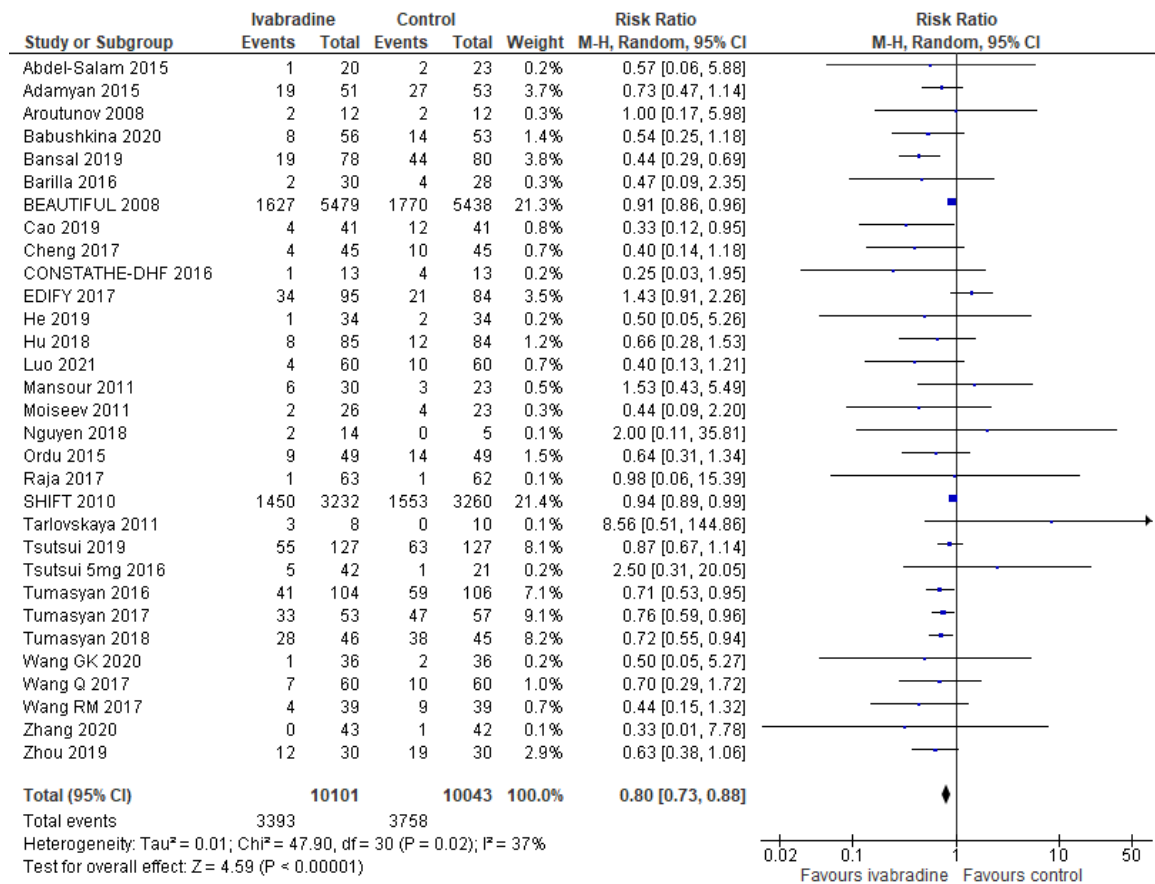

**Figure 18 – Forest plot of the meta-analysis of serious adverse events using random-effects meta-analysis.** The meta-analysis showed evidence of a beneficial effect of ivabradine versus control (placebo or no intervention).

**Sensitivity analyses**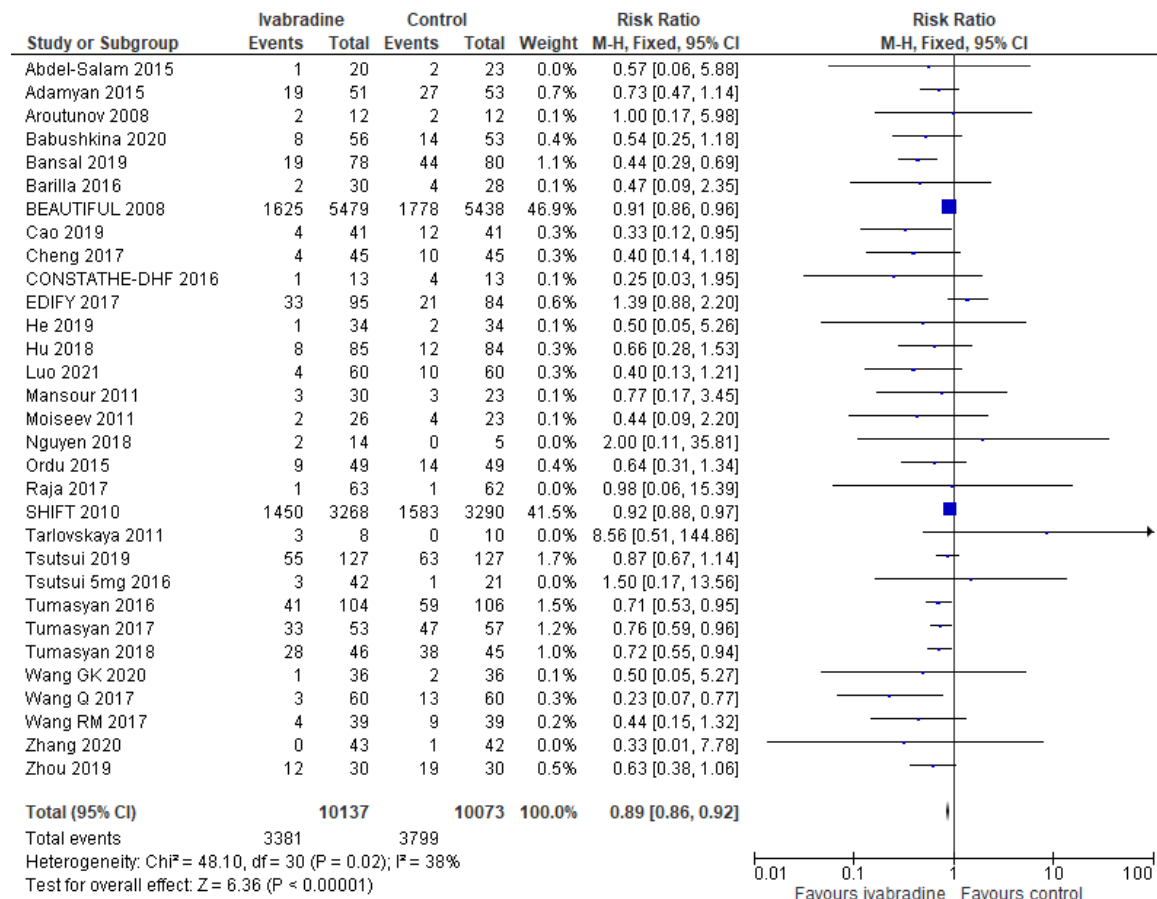**Figure 19 - Forest plot of the sensitivity analysis of serious adverse events using best- compared with worst-case scenario.**

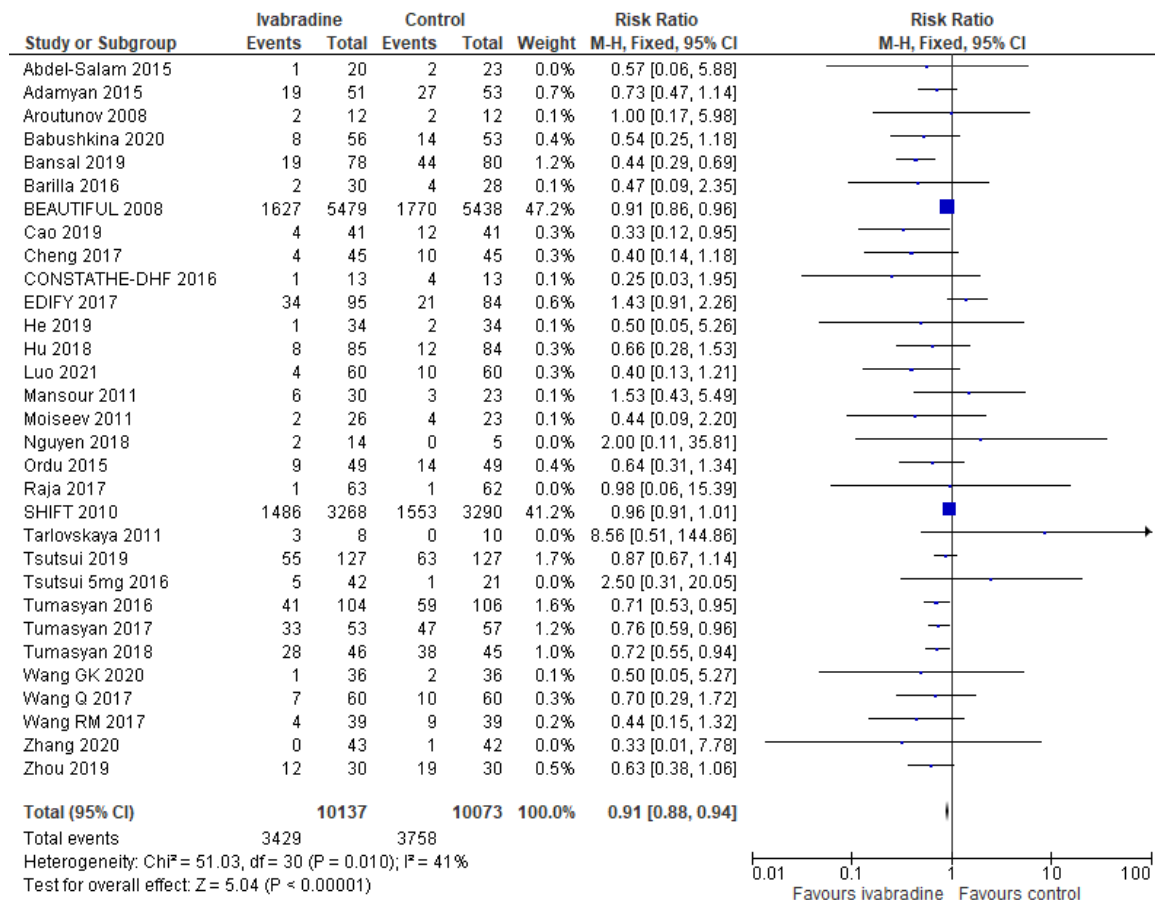

Figure 20 - Forest plot of the sensitivity analysis of serious adverse events using worst- compared with best-case scenario.



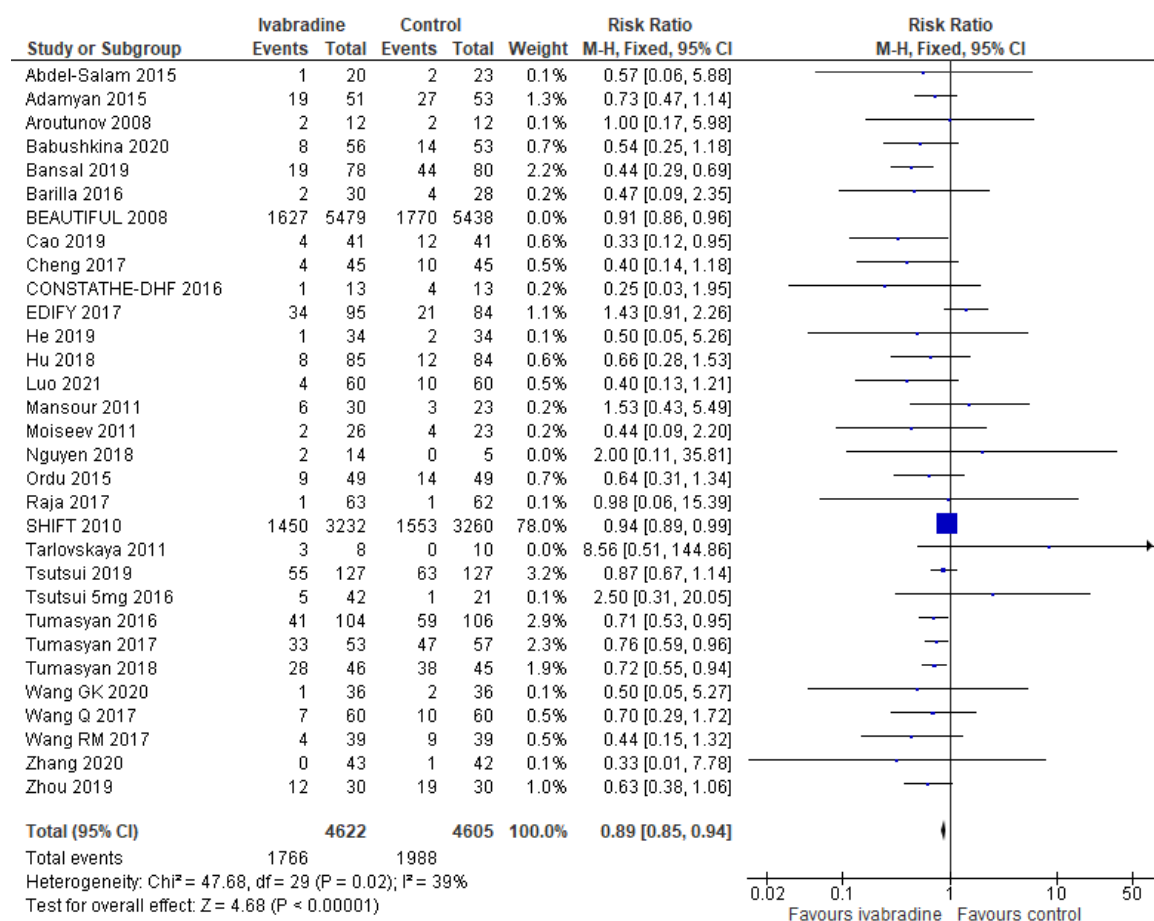

Figure 21 – Forest plot of the sensitivity analysis of serious adverse events removing the BEAUTIFUL trial.

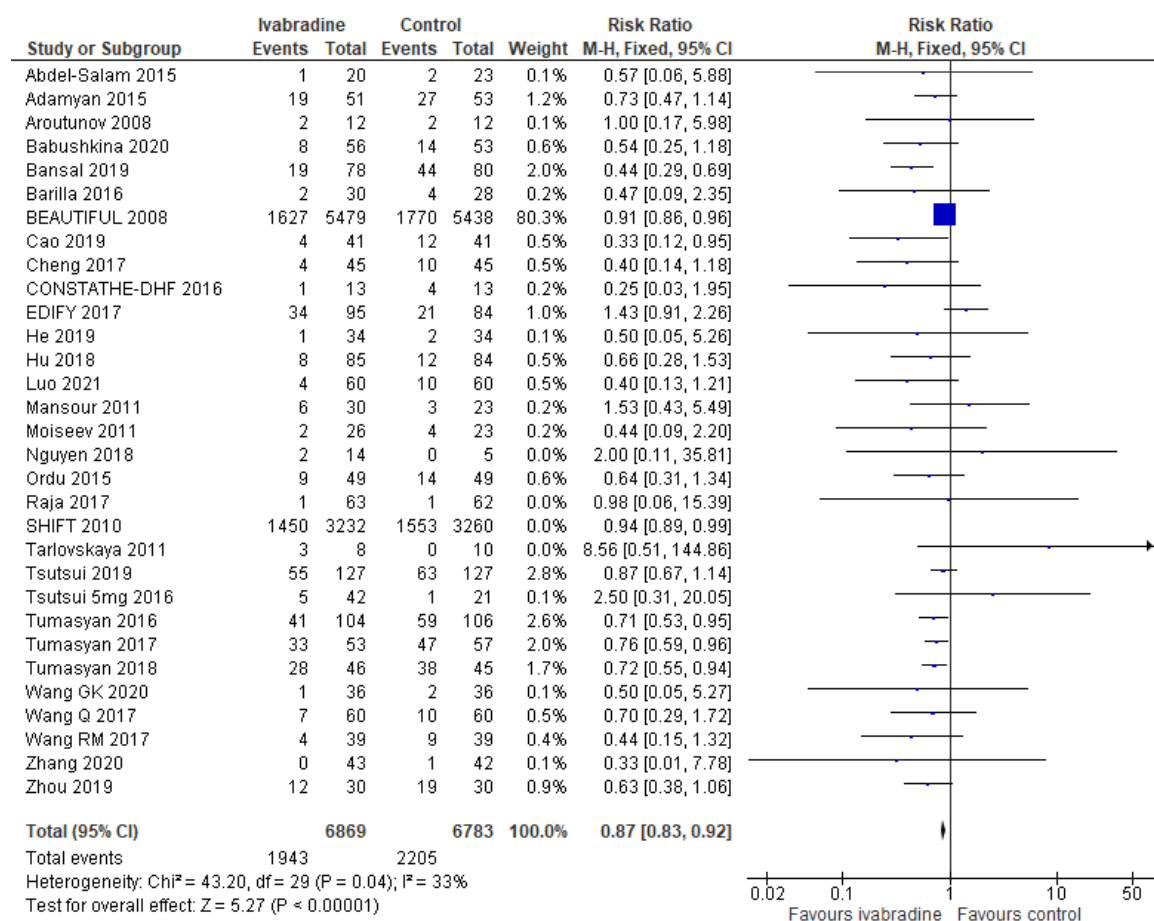

Figure 22 – Forest plot of the sensitivity analysis of serious adverse events removing the SHIFT trial.

**Subgroup analyses**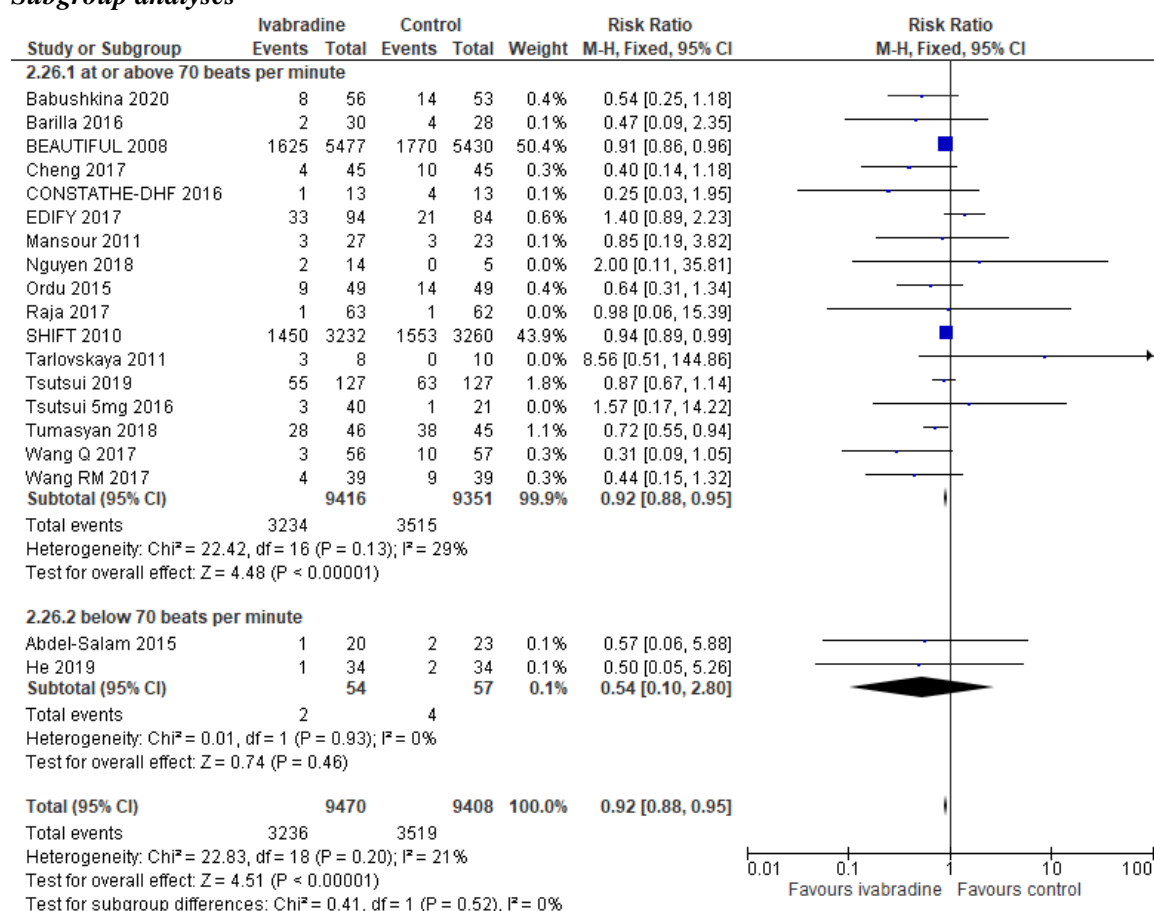

**Figure 23 - Forest plot of the subgroup analyses of trials randomising participants with a heart rate at or above 70 beats per minute compared to trials randomising participants with heart rate below 70 beats per minute on all-cause mortality.**

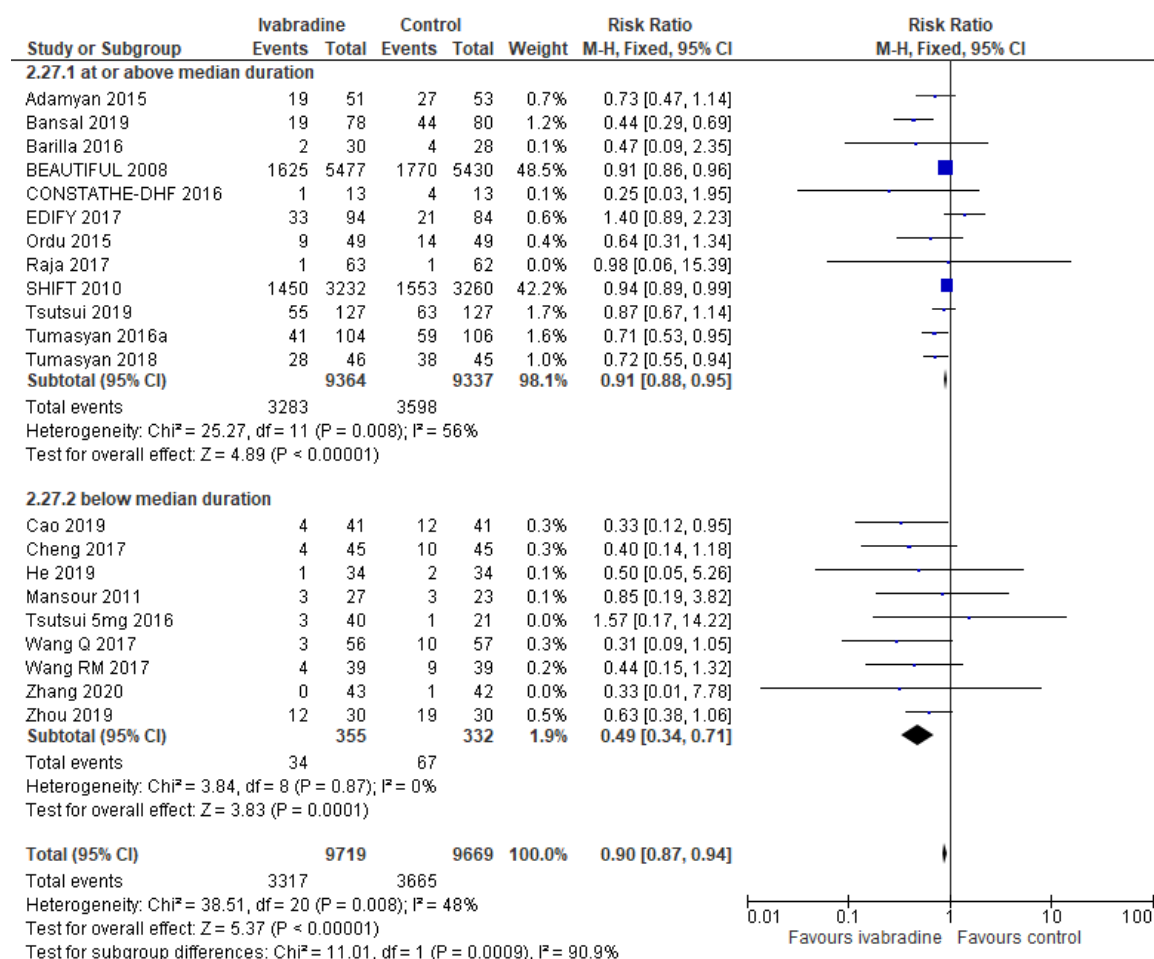

**Figure 24 - Forest plot of the subgroup analyses of trials administering ivabradine at or above median duration (182.64 days) compared to trials administering ivabradine below median duration on serious adverse events.**

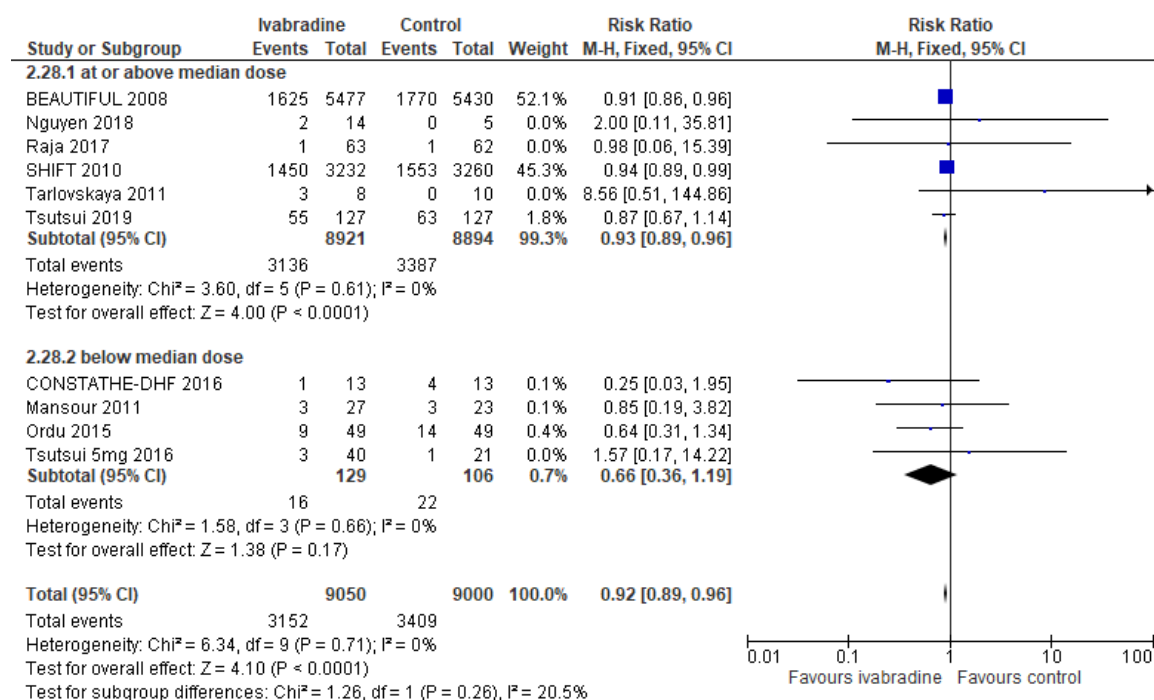

**Figure 25 - Forest plot of the subgroup analyses of trials administering ivabradine at or above median daily dose (12.36 mg) compared to trials administering ivabradine below median daily dose on serious adverse events.**

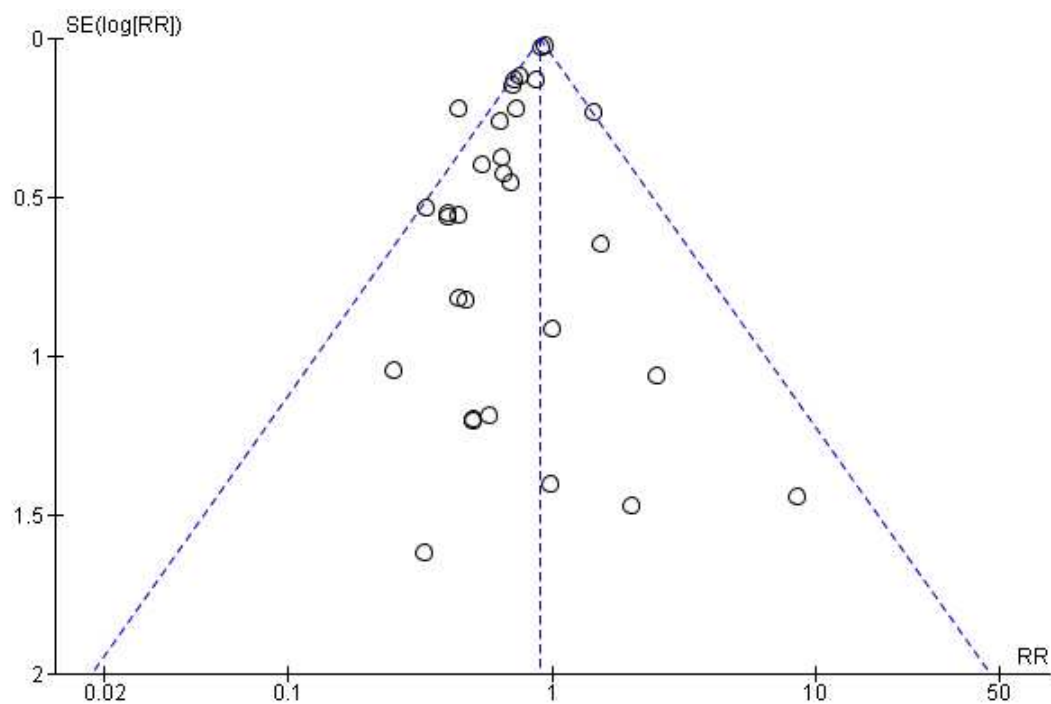

**Figure 26 – Funnel plot of the analysis of serious adverse events.** The funnel plot did not indicate small study bias.

Supplement 7 - Quality of life

Main analyses for trials using Kansas City Cardiomyopathy Questionnaire (KCCQ)

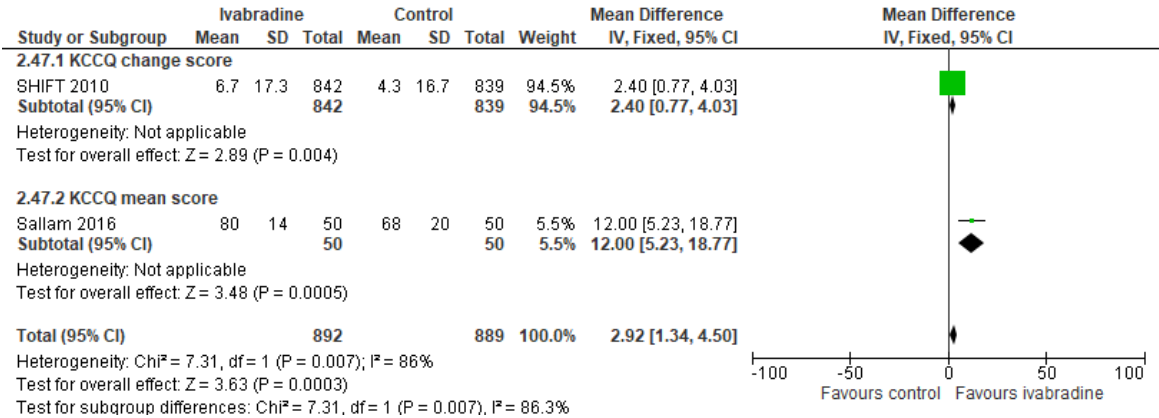

Figure 27 – Forest plot of the meta-analysis of quality of life from trials using the KCCQ using fixed-effect meta-analysis. The meta-analysis showed evidence of a beneficial effect of ivabradine.

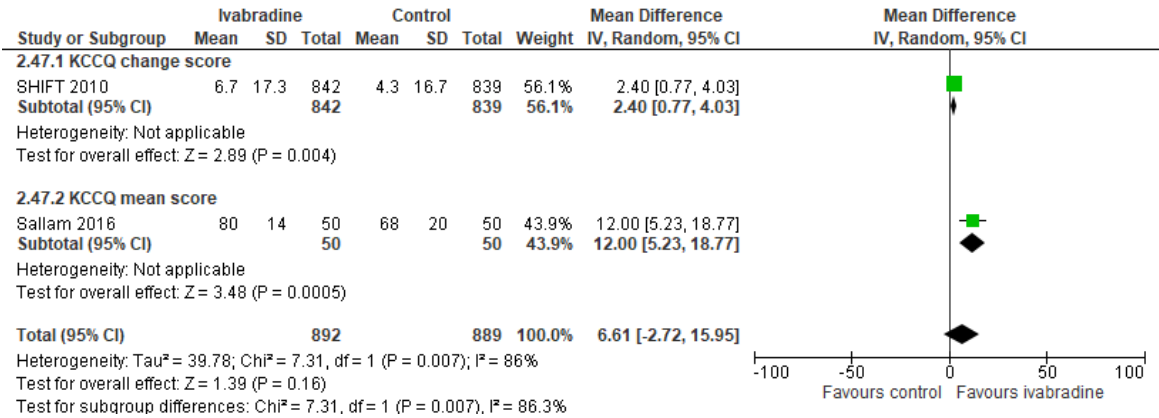

Figure 28 – Forest plot of the meta-analysis of quality of life from trials using the Kansas City Cardiomyopathy Questionnaire (KCCQ) using random-effects meta-analysis. The meta-analysis showed no evidence of a difference between ivabradine and control.

*Sensitivity analyses for trials using KCCQ.*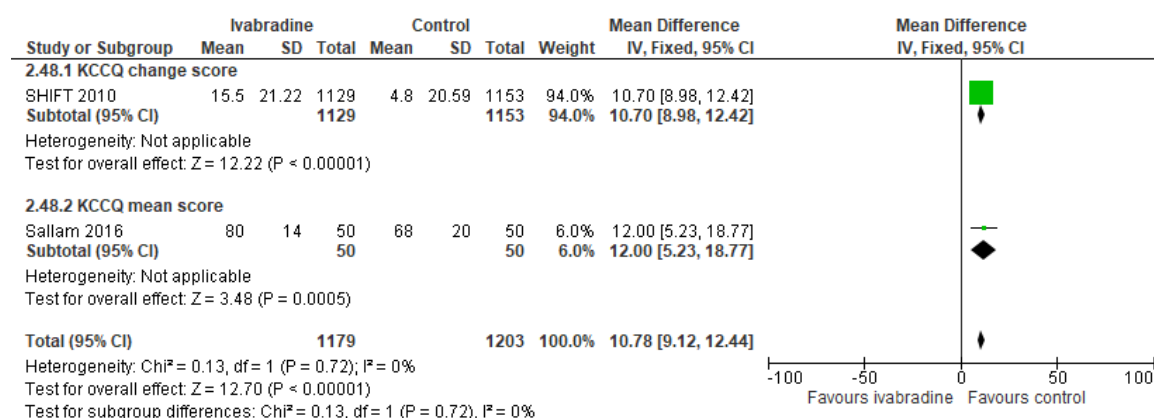**Figure 29 – Forest plot of the sensitivity analysis of quality of life (KCCQ) using best- compared with worst-case scenario.**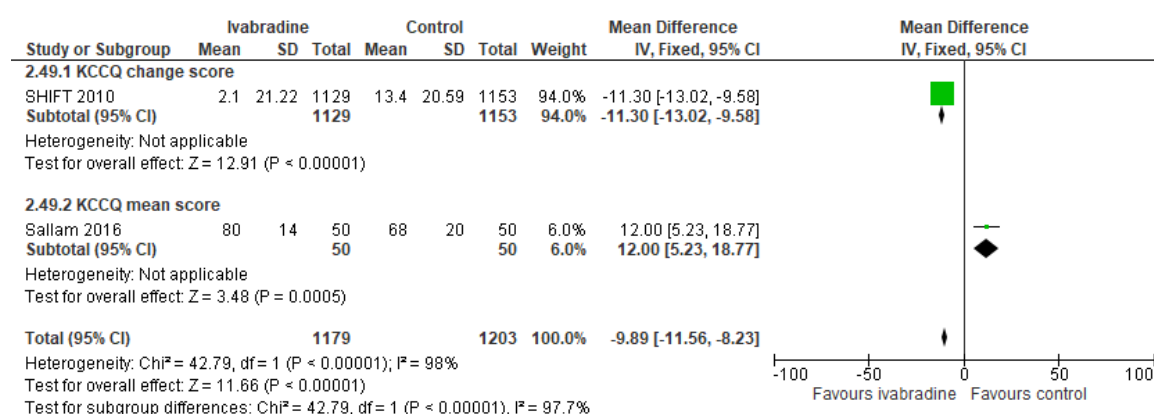**Figure 30 – Forest plot of the sensitivity analysis of quality of life (MLWHFQ) using worst- compared with best-case scenario.**



Subgroup analyses for trials using the KCCQ

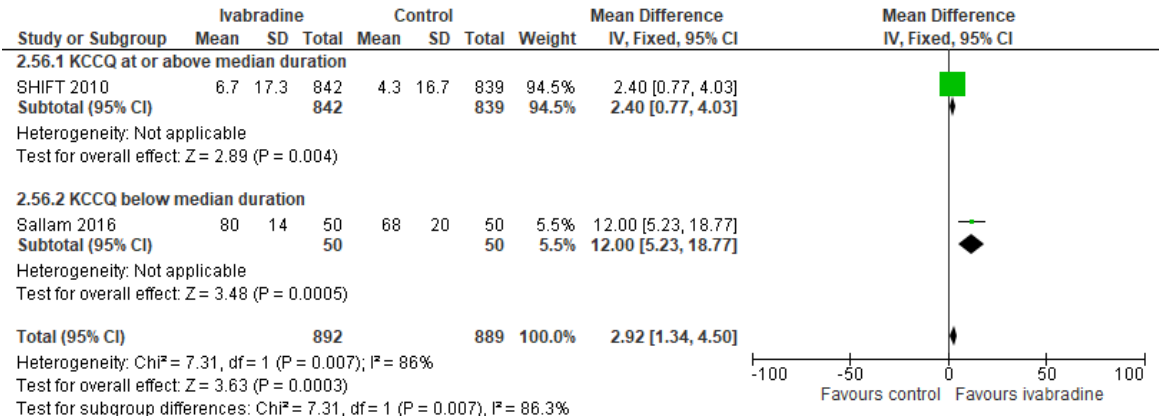

Figure 31 – Forest plot of the subgroup analyses of trials administering ivabradine at or above median duration (90.66 days) compared to trials administering ivabradine below median duration on quality of life using the KCCQ.

Main analyses for trials using Minnesota Living With Heart Failure Questionnaire (MLWHFQ)

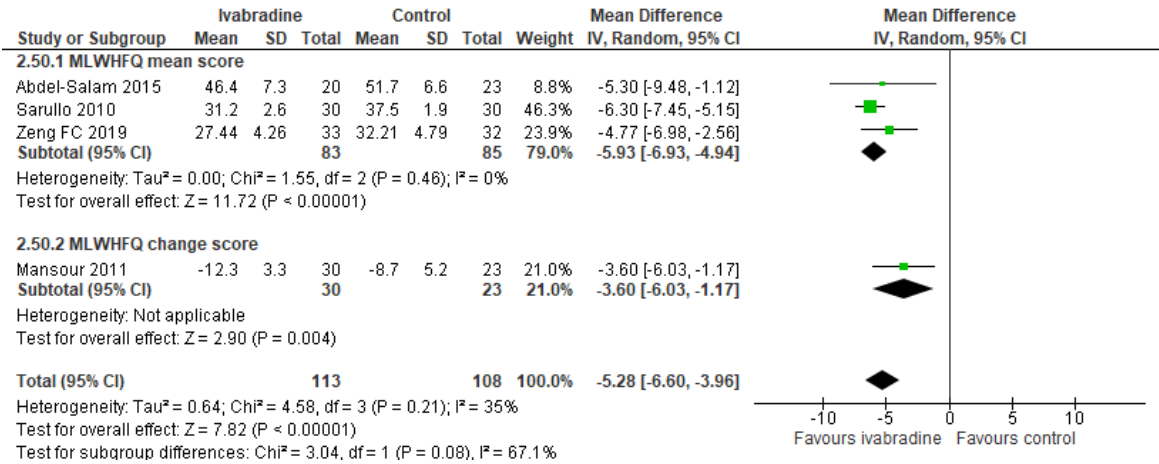

Figure 32 – Forest plot of the meta-analysis of quality of life from trials using the MLWHFQ using random-effects meta-analysis. The meta-analysis showed no evidence of a difference between ivabradine and control.

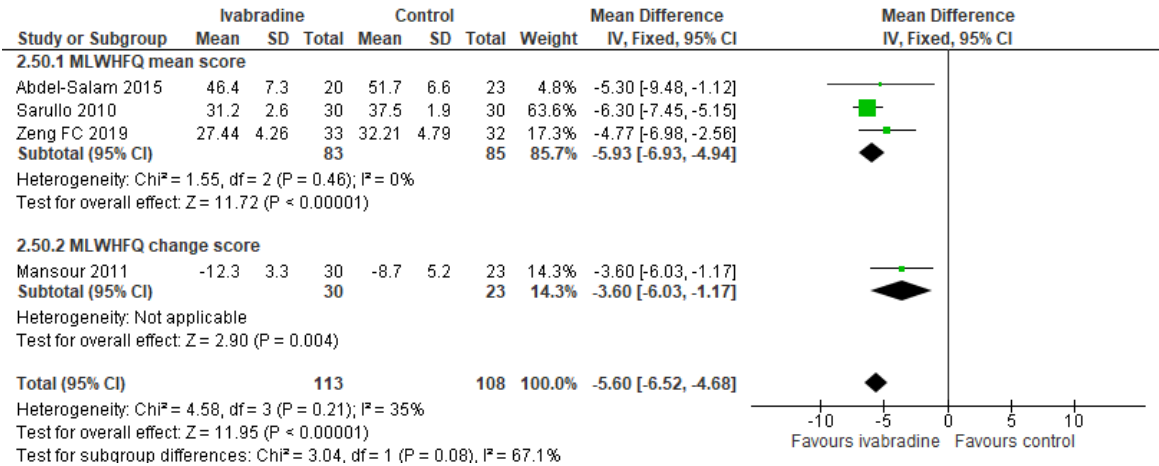

Figure 33 – Forest plot of the meta-analysis of quality of life from trials using the MLWHFQ using fixed-effect meta-analysis. The meta-analysis showed evidence of a beneficial effect of ivabradine.

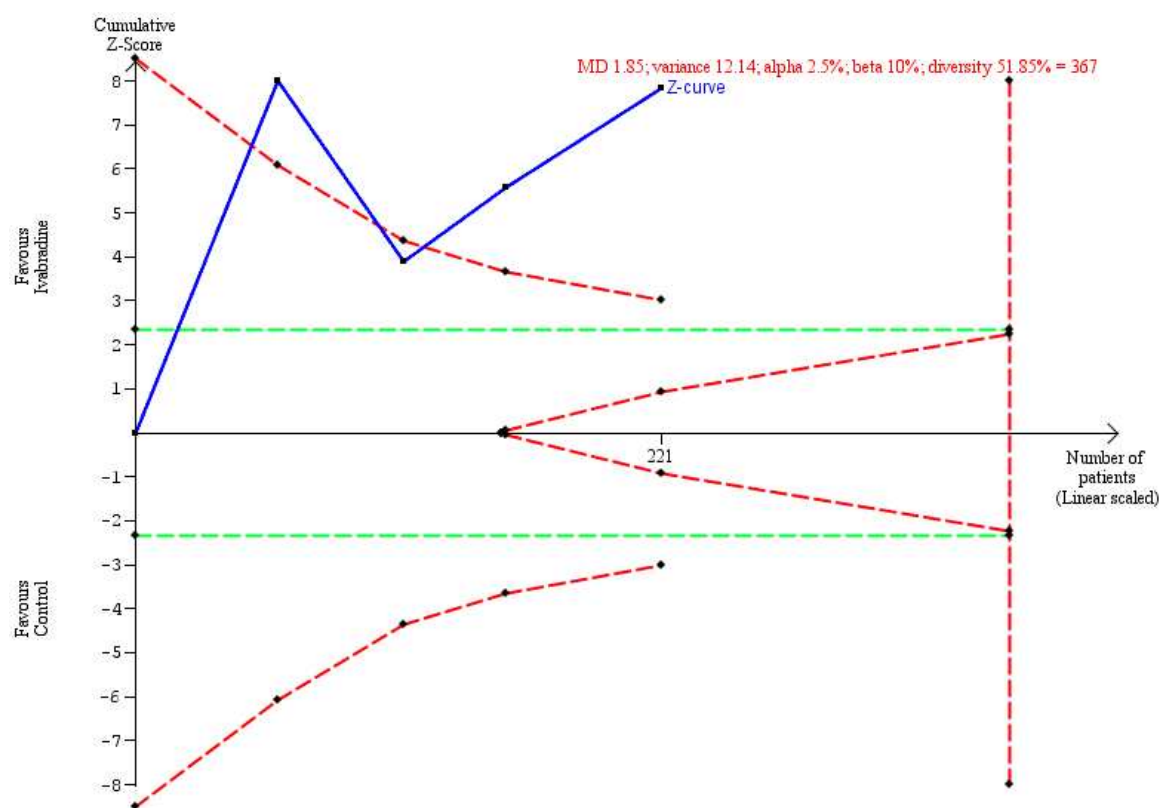

**Figure 34 – Trial Sequential Analysis graph of quality of life from trials using the MLWHFQ.** Trial Sequential Analysis showed that we had enough information to detect a mean difference of -5.60 points of ivabradine versus control (placebo or no intervention). The cumulative z-curve (the blue line) breached the boundary of benefit. MD: mean difference (SD/2 from the control group).

**Sensitivity analyses of quality of life from trials using the MLWHFQ.**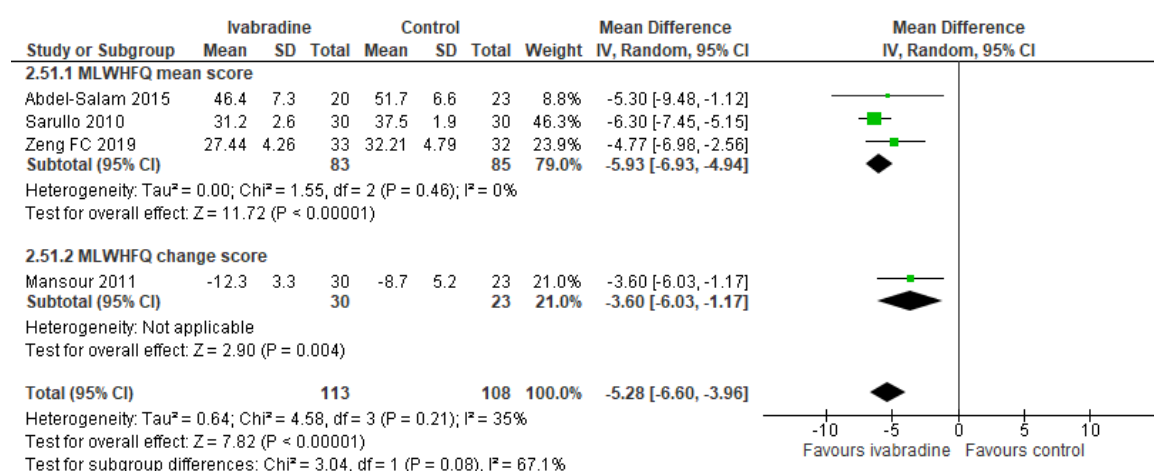**Figure 35 – Forest plot of the sensitivity analysis of quality of life (MLWHFQ) using best- compared with worst-case scenario.**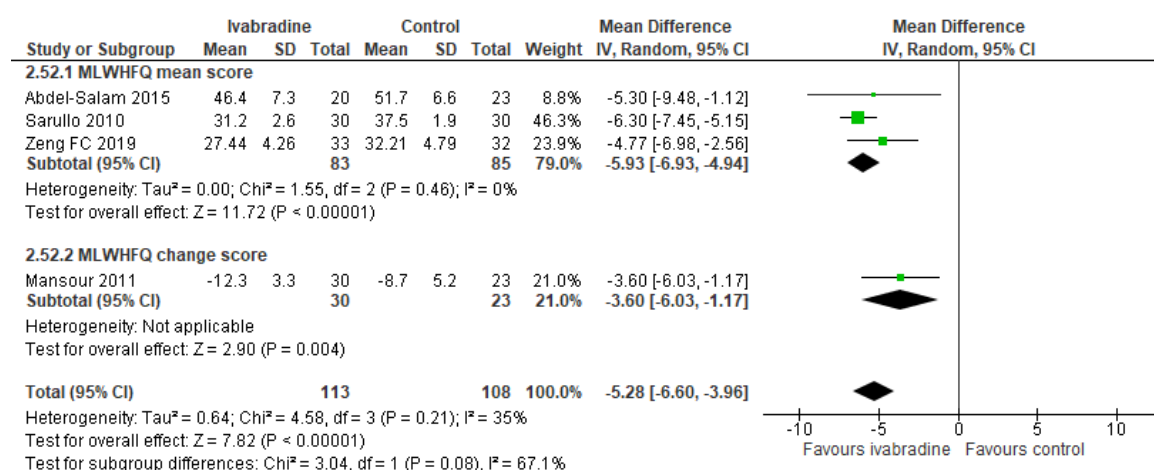**Figure 36 – Forest plot of the sensitivity analysis of quality of life (MLWHFQ) using worst- compared with best-case scenario.**

**Subgroup analyses of quality of life from trials using the MLWHFQ**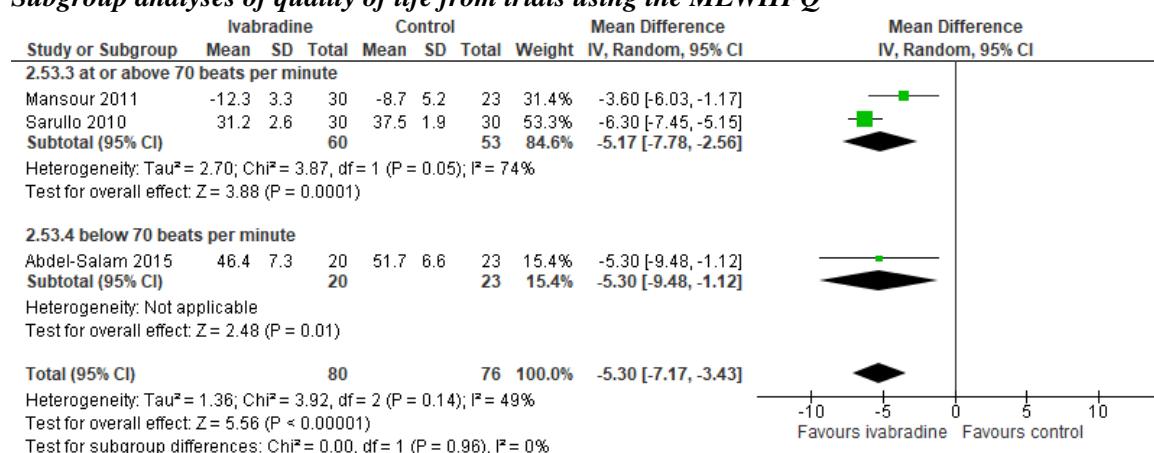

**Figure 37 - Forest plot of the subgroup analyses of trials randomising participants with a heart rate at or above 70 beats per minute compared trials randomising participants with heart rate below 70 beats per minute on quality of life using the MLWHFQ.**

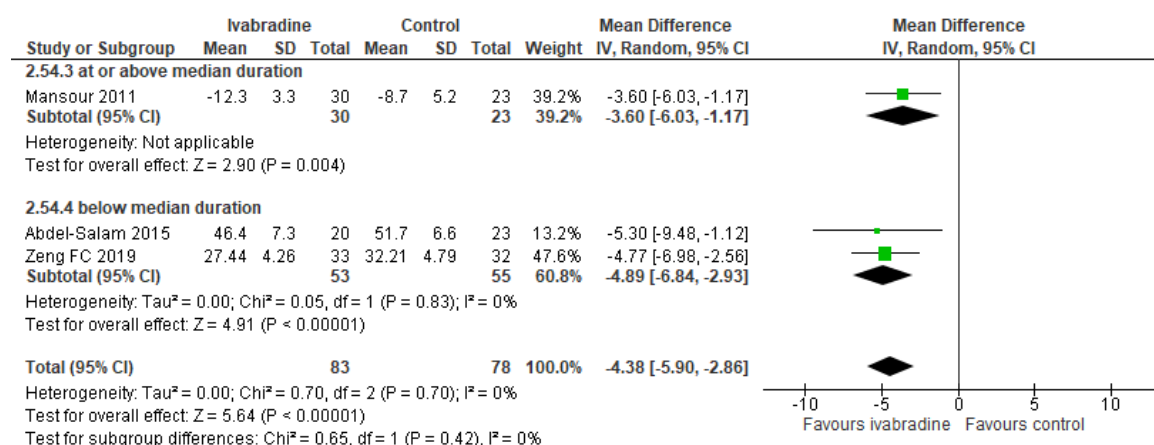

**Figure 38 – Forest plot of the subgroup analyses of trials administering ivabradine at or above median duration (90.66 days) compared to trials administering ivabradine below median duration on quality of life using the MLWHFQ.**

## Supplement 8 - Cardiovascular mortality

### Main analyses

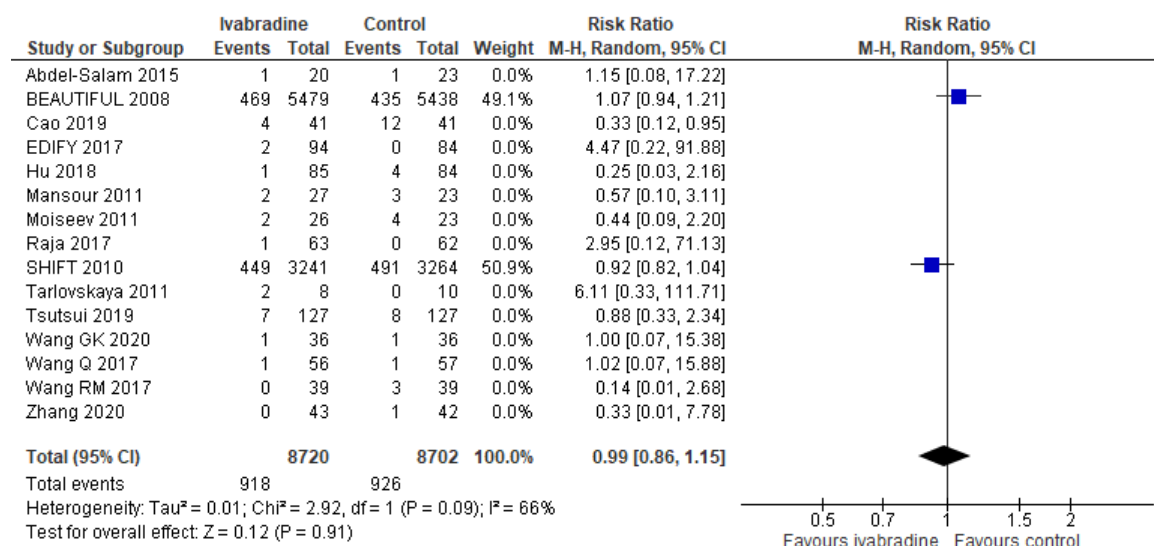

**Figure 39 – Forest plot of the meta-analysis of cardiovascular mortality using random-effects meta-analysis including only trials at low risk of bias.** The meta-analysis showed no evidence of a difference between ivabradine versus control (placebo or no intervention).

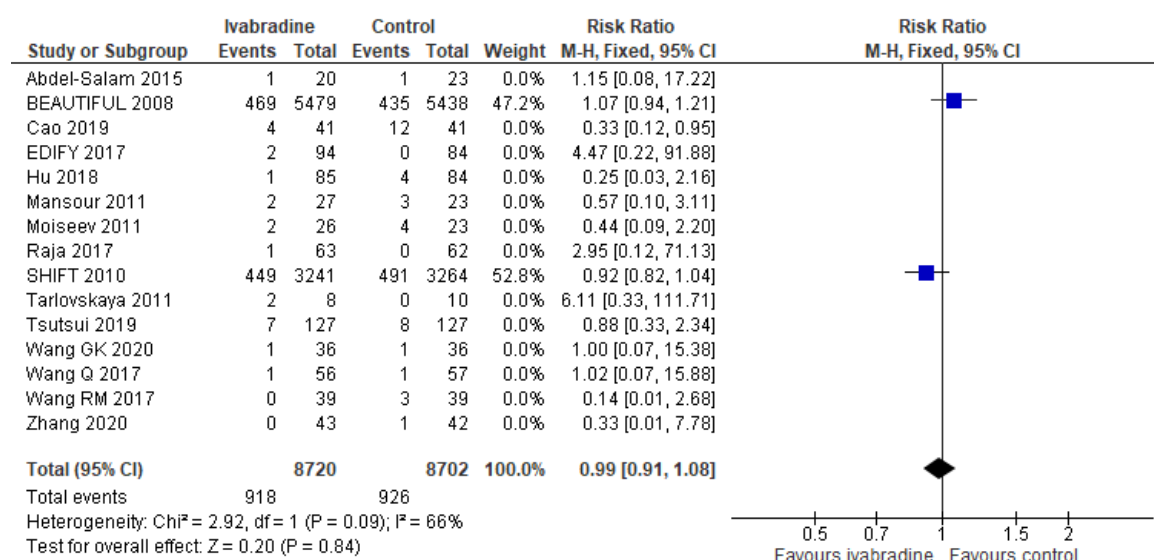

**Figure 40 – Forest plot of the meta-analysis of cardiovascular mortality using fixed-effect meta-analysis including only trials at low risk of bias.** The meta-analysis showed no evidence of a difference between ivabradine versus control (placebo or no intervention).

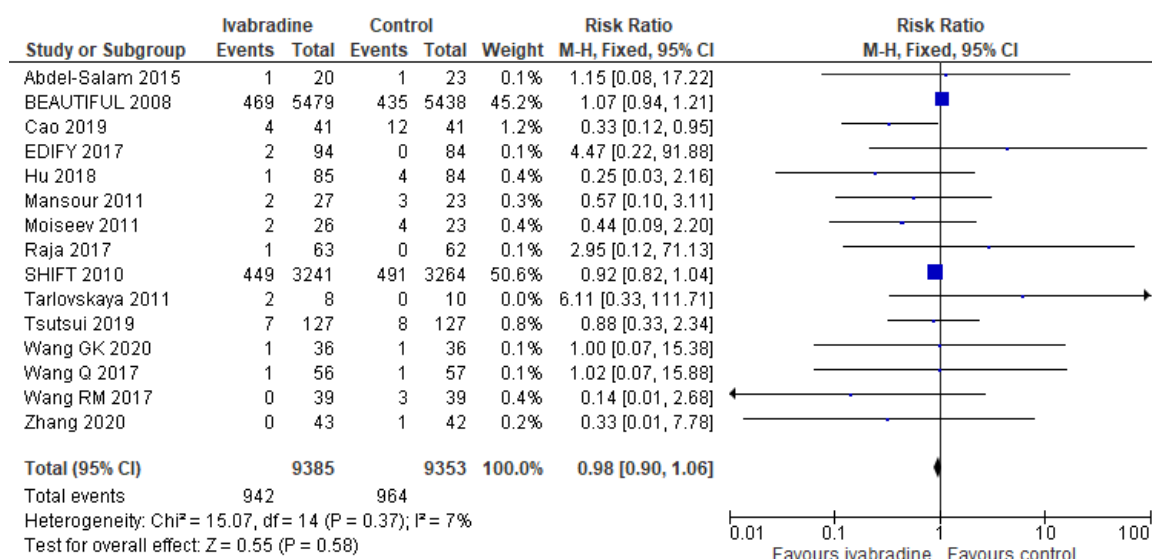

**Figure 41 – Forest plot of the meta-analysis of cardiovascular mortality using fixed-effect meta-analysis.** The meta-analysis showed no evidence of a difference between ivabradine versus control (placebo or no intervention).

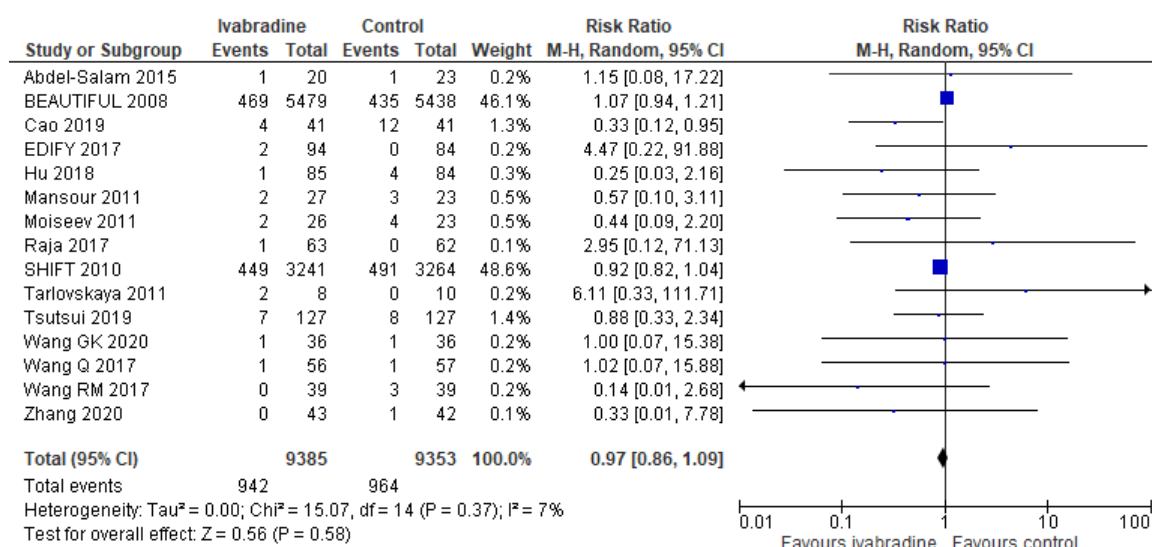

**Figure 42 - Forest plot of the meta-analysis of cardiovascular mortality using random-effects meta-analysis.** The meta-analysis showed no evidence of a difference between ivabradine versus control (placebo or no intervention).

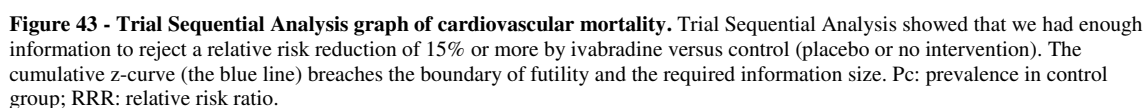



### Sensitivity analyses

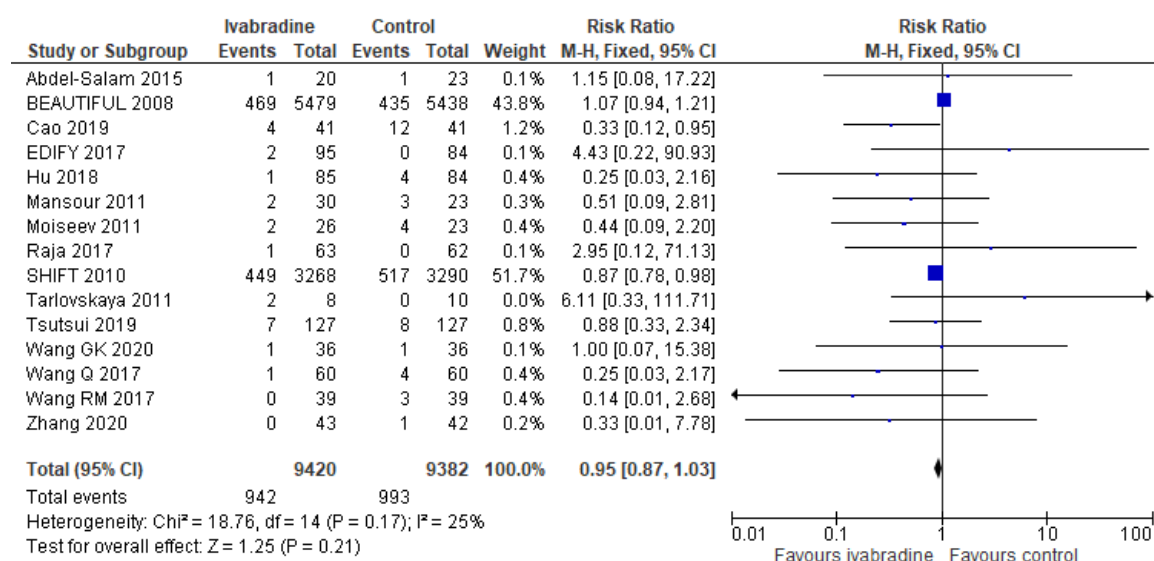

Figure 44 - Forest plot of the sensitivity analysis of cardiovascular mortality using best- compared with worst-case scenario.

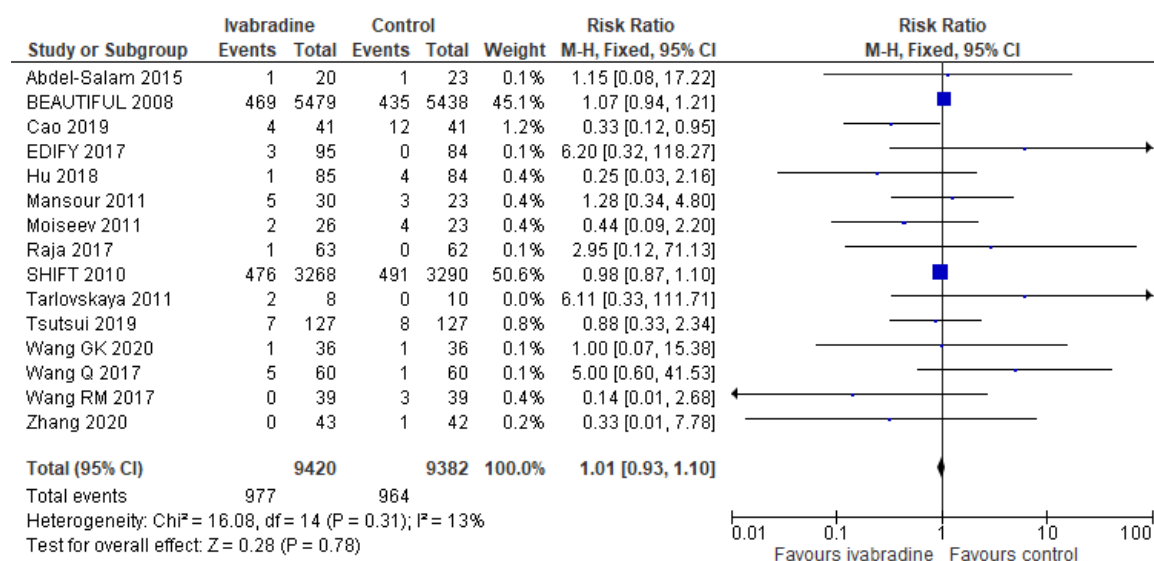

Figure 45 – Forest plot of the sensitivity analysis of cardiovascular mortality using worst compared with best-case scenario.

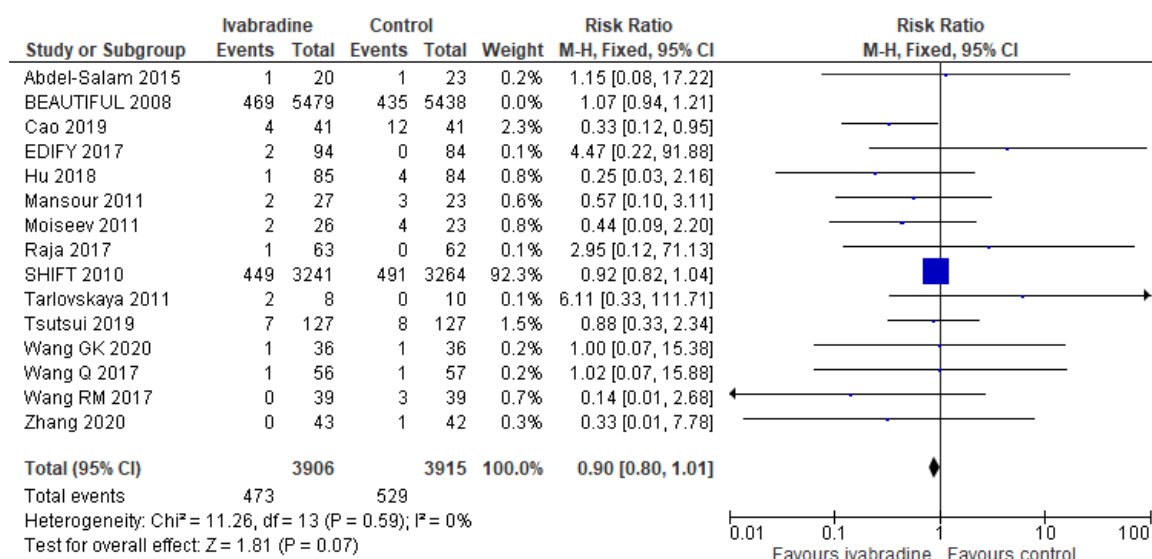

Figure 46 – Forest plot of the sensitivity analysis of cardiovascular mortality removing the BEAUTIFUL trial.

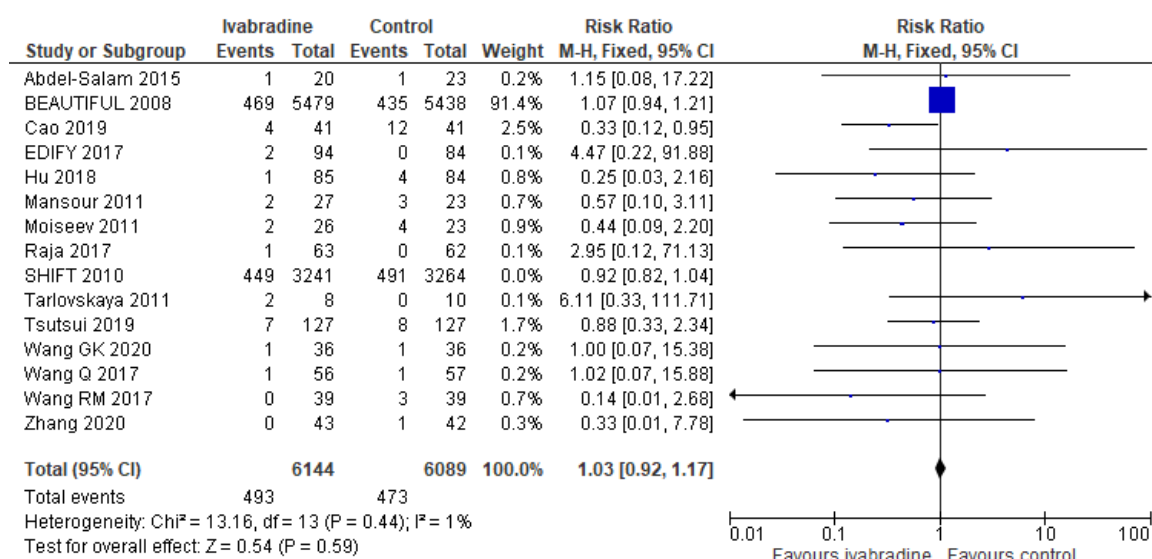

Figure 47 – Forest plot of the sensitivity analysis of cardiovascular mortality removing the SHIFT trial.

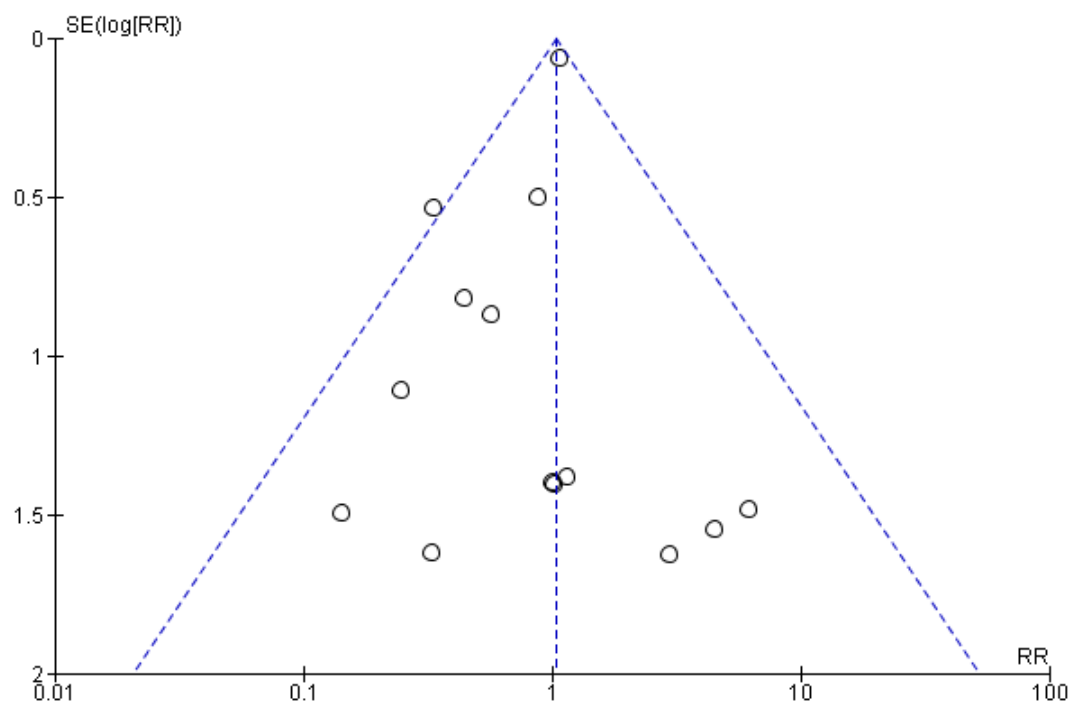

**Figure 48 – Funnel plot of the analysis of cardiovascular mortality.** The funnel plot did not indicate small study bias.

## Supplement 9 - Myocardial infarction

### Main analyses

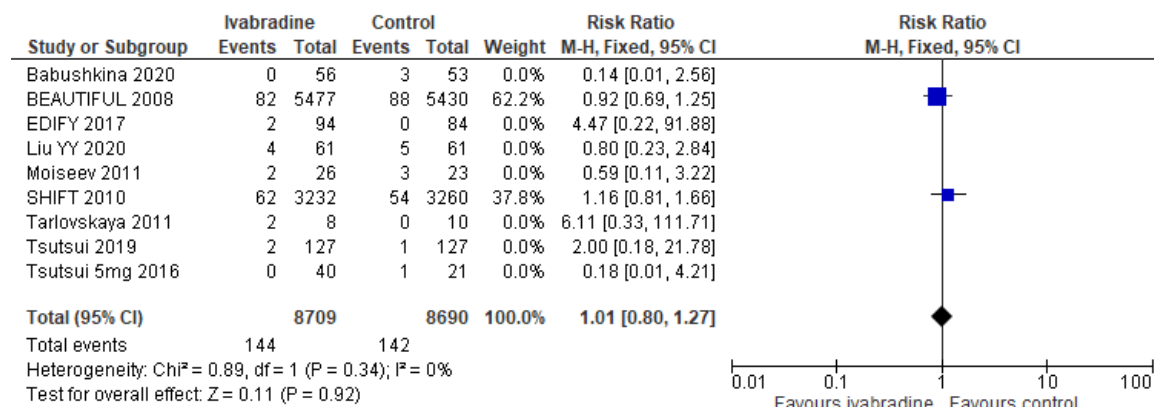

**Figure 49 – Forest plot of the meta-analysis of myocardial infarction using fixed-effect meta-analysis including only trial results at low risk of bias.** The meta-analysis showed no evidence of a difference between ivabradine versus control (placebo or no intervention).

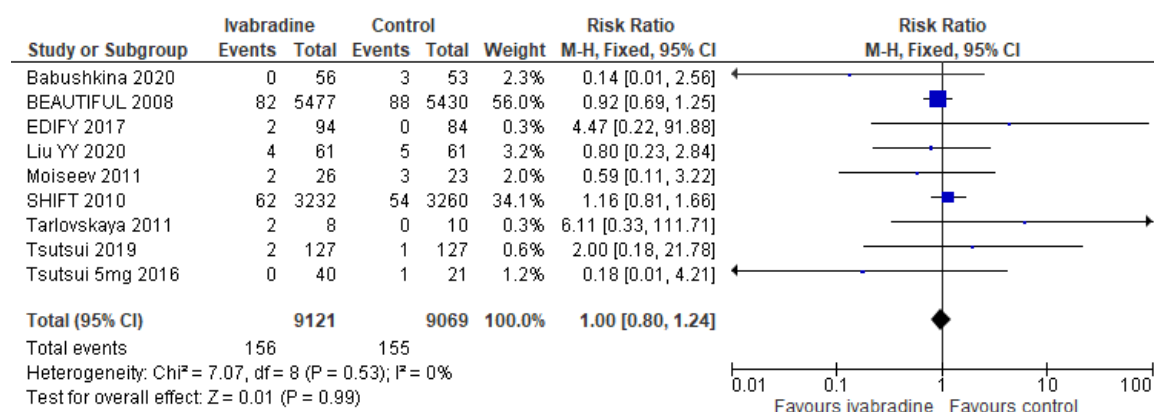

**Figure 50 - Forest plot of the meta-analysis of myocardial infarction using fixed-effect meta-analysis.** The meta-analysis showed no evidence of a difference between ivabradine versus control (placebo or no intervention).

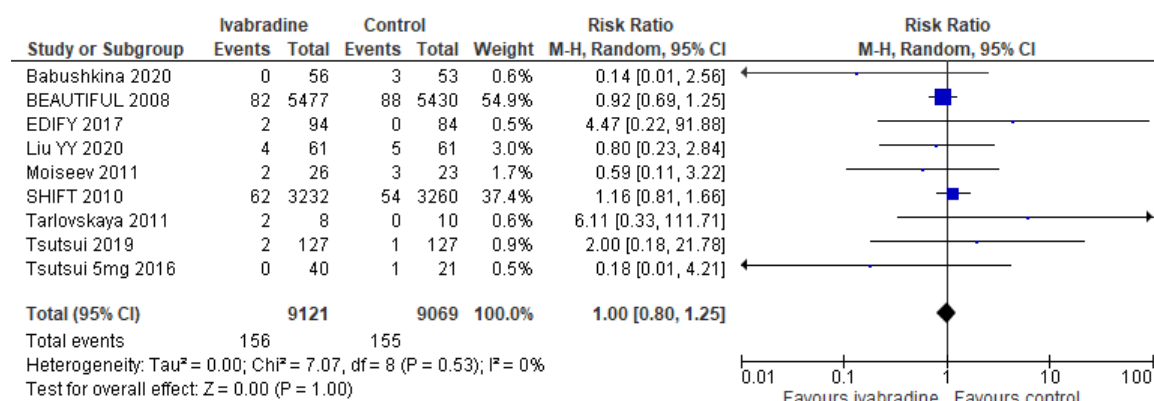

**Figure 51 - Forest plot of the meta-analysis of myocardial infarction using random-effects meta-analysis.** The meta-analysis showed no evidence of a difference between ivabradine versus control (placebo or no intervention).

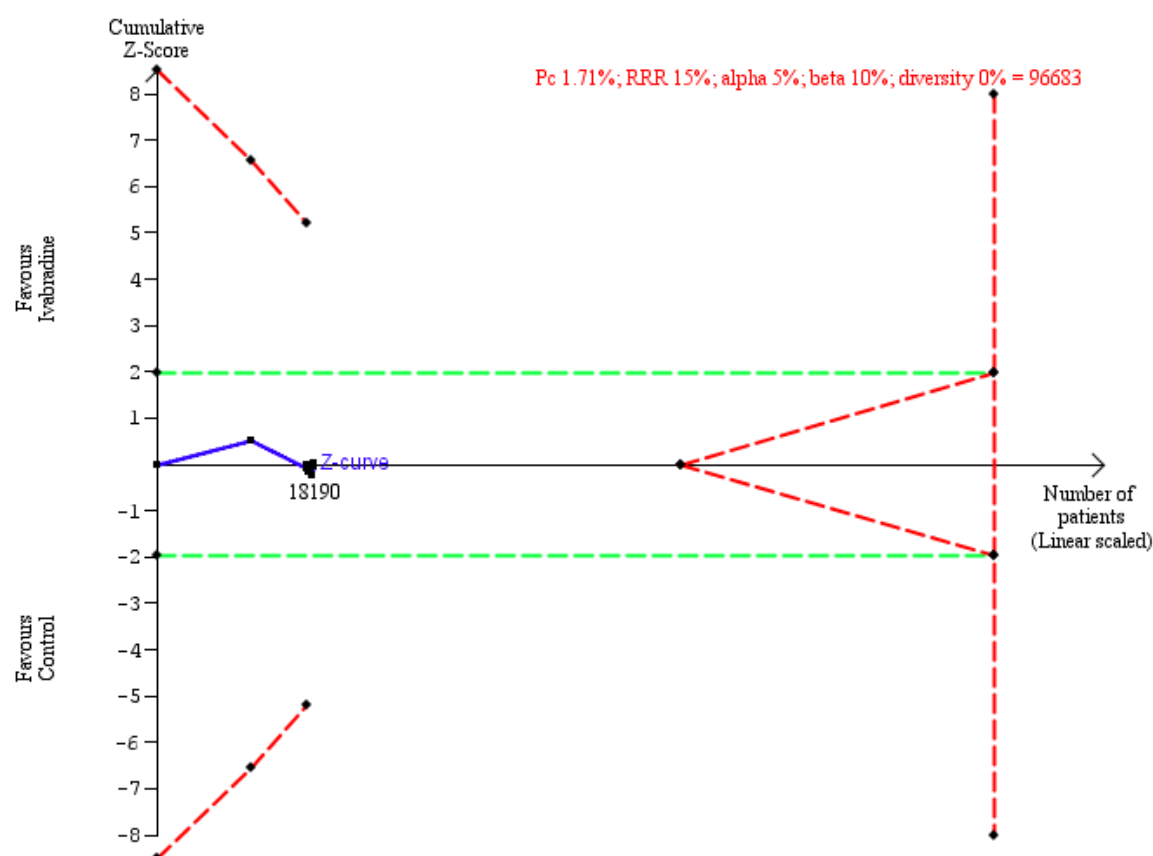

**Figure 52 - Trial Sequential Analysis graph of myocardial infarction.** Trial Sequential Analysis showed that we did not have enough information to detect or reject a relative risk reduction of 15% or more by ivabradine versus control (placebo or no intervention). The cumulative z-curve (the blue line) does not breach any boundaries. Pc: prevalence in control group; RRR: relative risk ratio.

### Sensitivity analyses

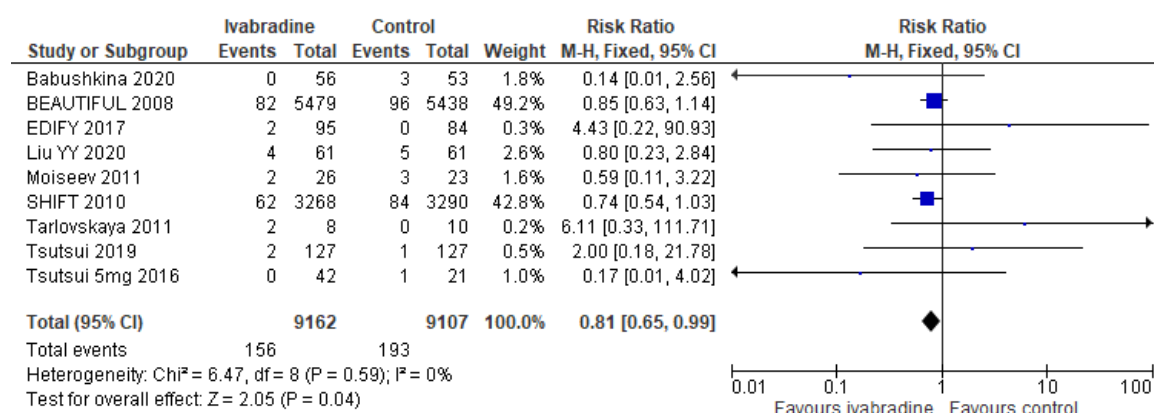

Figure 53 – Forest plot of the sensitivity analysis of myocardial infarction using a best- compared with worst-case scenario.

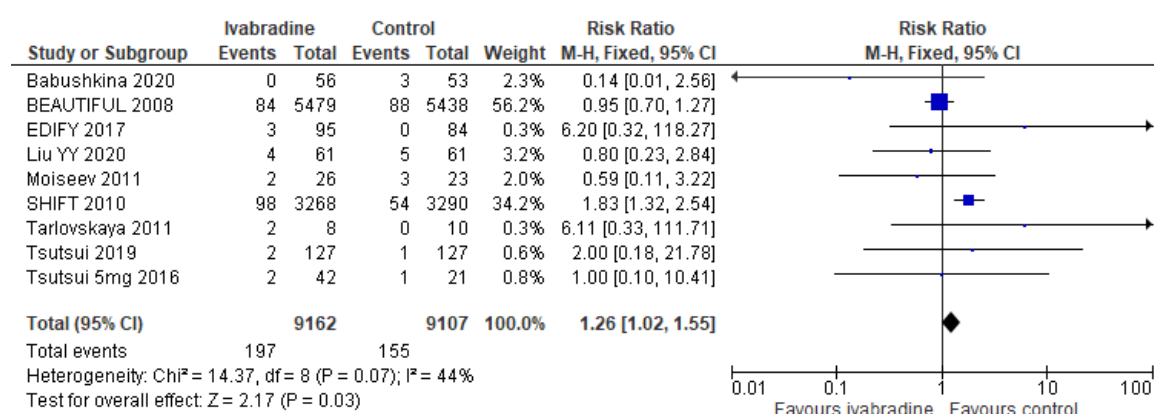

Figure 54 - Forest plot of the sensitivity analysis of myocardial infarction using a worst- compared with best-case scenario.

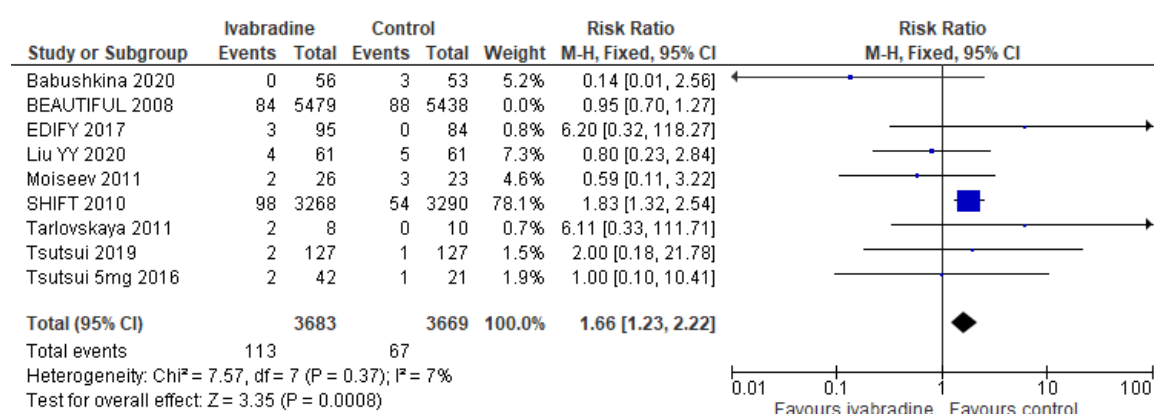

Figure 55 – Forest plot of the sensitivity analysis of myocardial infarction removing the BEAUTIFUL trial.

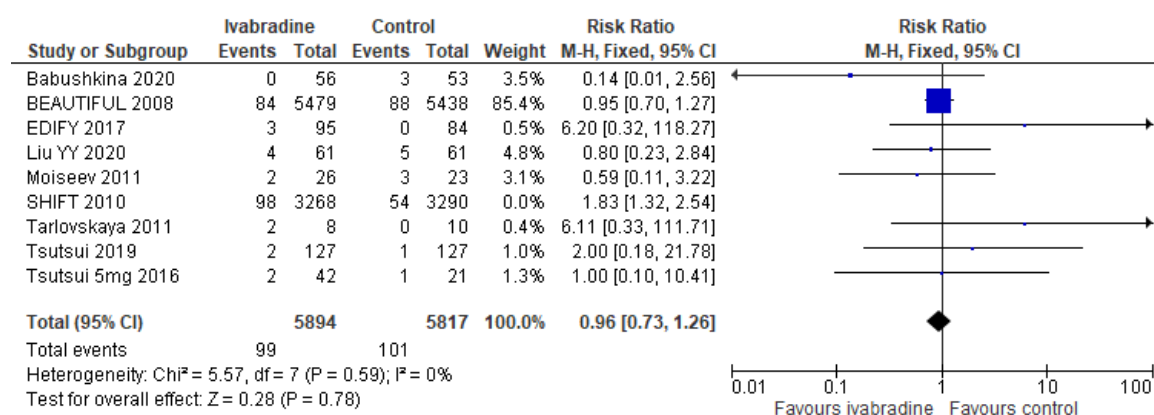

Figure S6 – Forest plot of the sensitivity analysis of myocardial infarction removing the SHIFT trial.

## Supplement 10 - Non-serious adverse events

### Main analyses

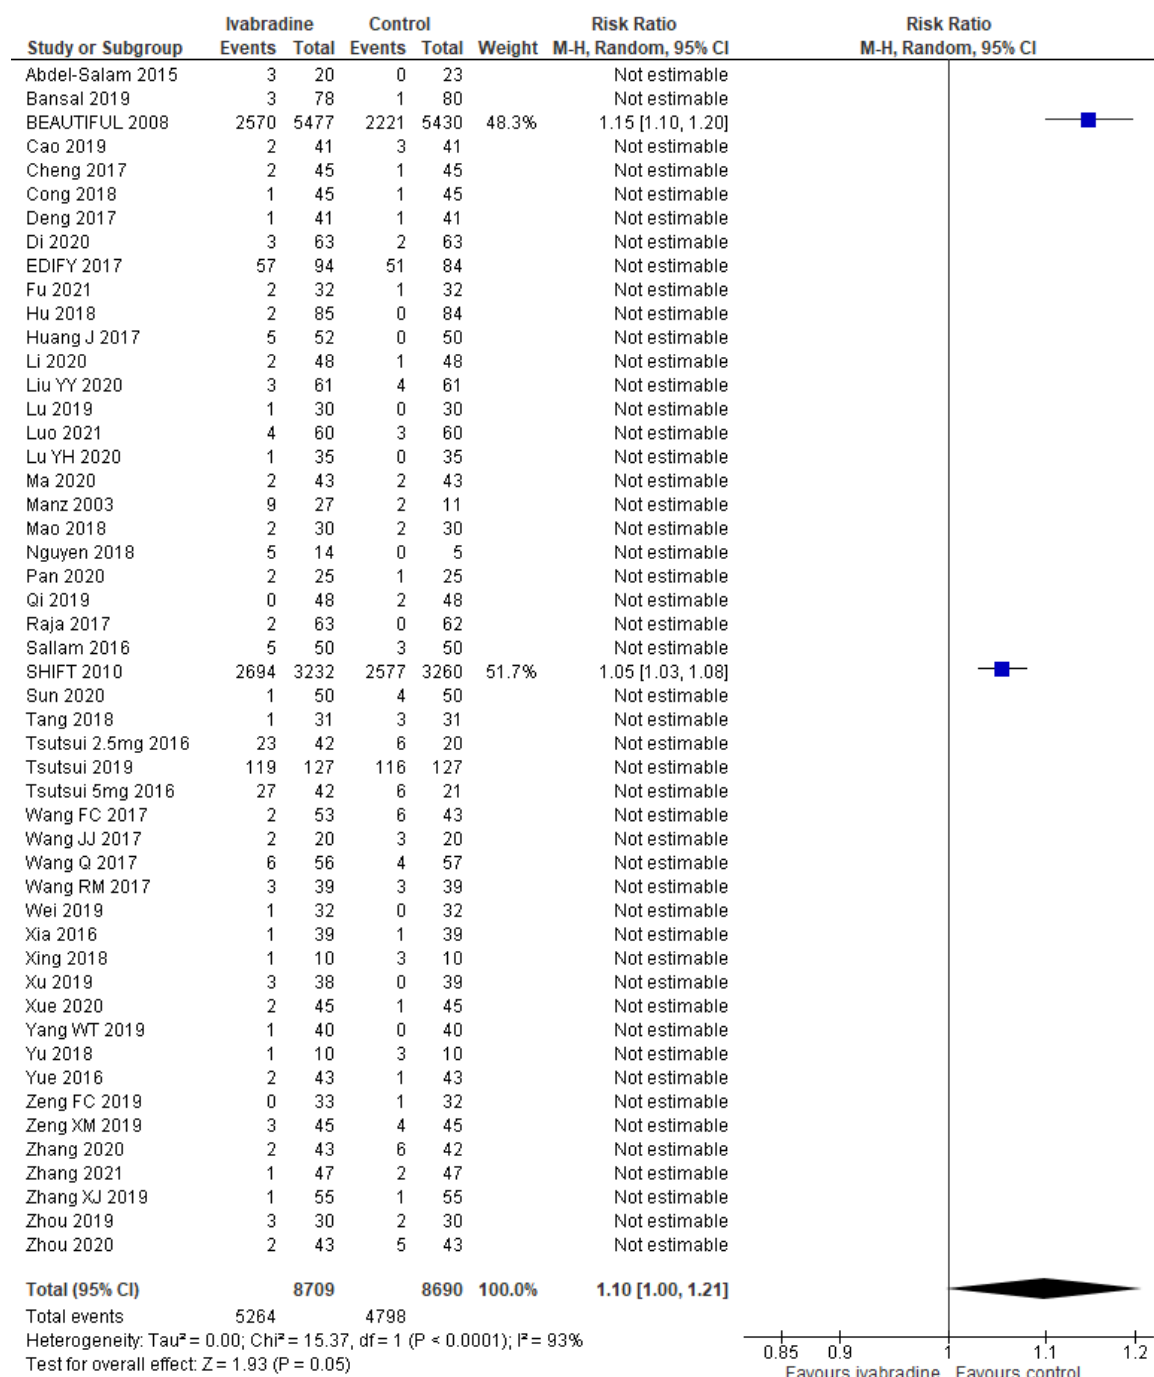

**Figure 57 – Forest plot of the meta-analysis of non-serious adverse events using random-effects meta-analysis including only trials at low risk of bias.** The meta-analysis showed evidence of a harmful effect of ivabradine versus control (placebo or no intervention)



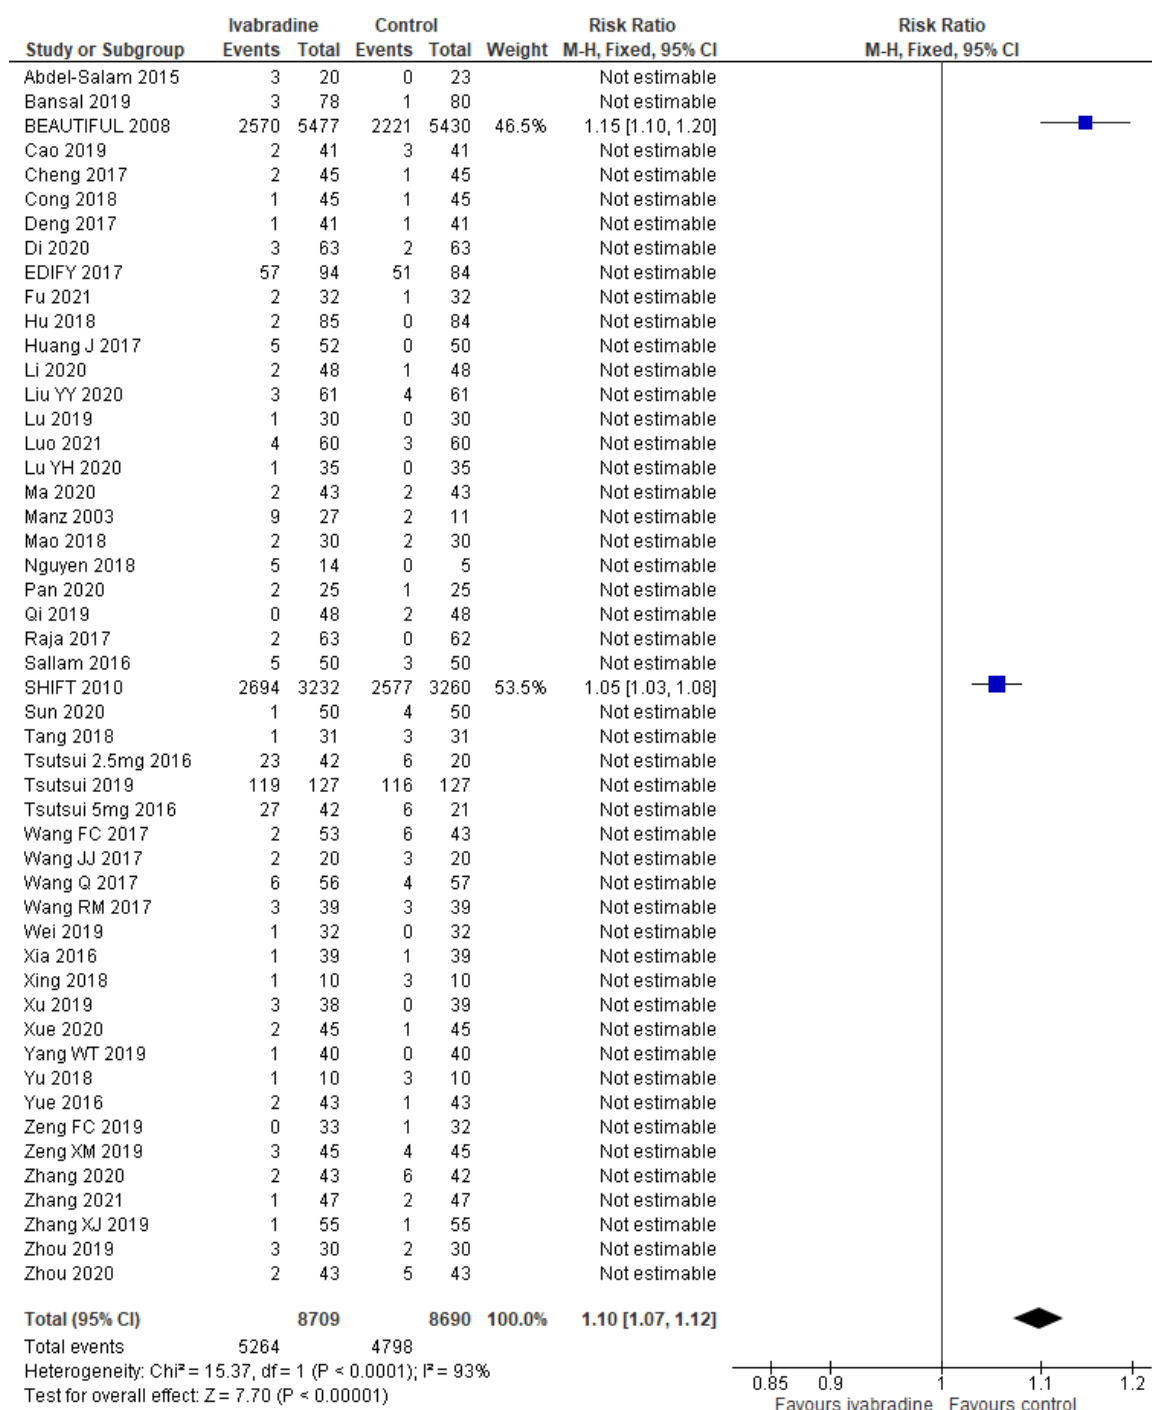

**Figure 58 – Forest plot of the meta-analysis of non-serious adverse events using fixed-effect meta-analysis including only trials at low risk of bias.** The meta-analysis showed evidence of a harmful effect of ivabradine versus control (placebo or no intervention).

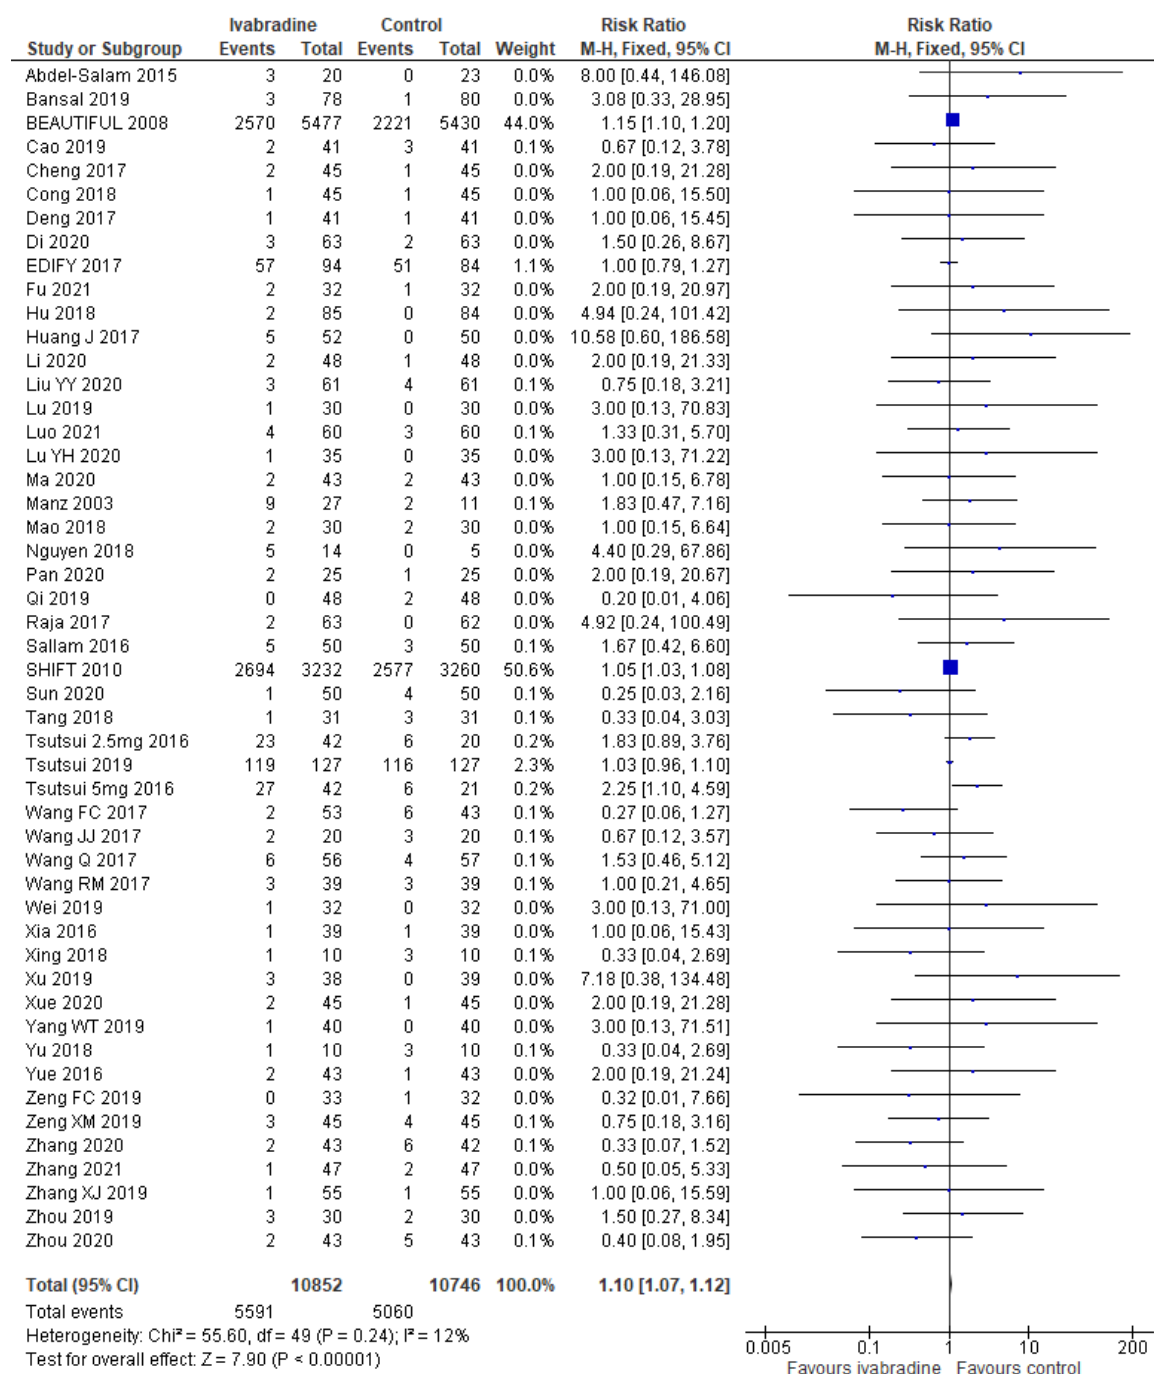

**Figure 59 - Forest plot of the meta-analysis of non-serious adverse events using fixed-effect meta-analysis.** The meta-analysis showed evidence of a harmful effect of ivabradine versus control (placebo or no intervention).

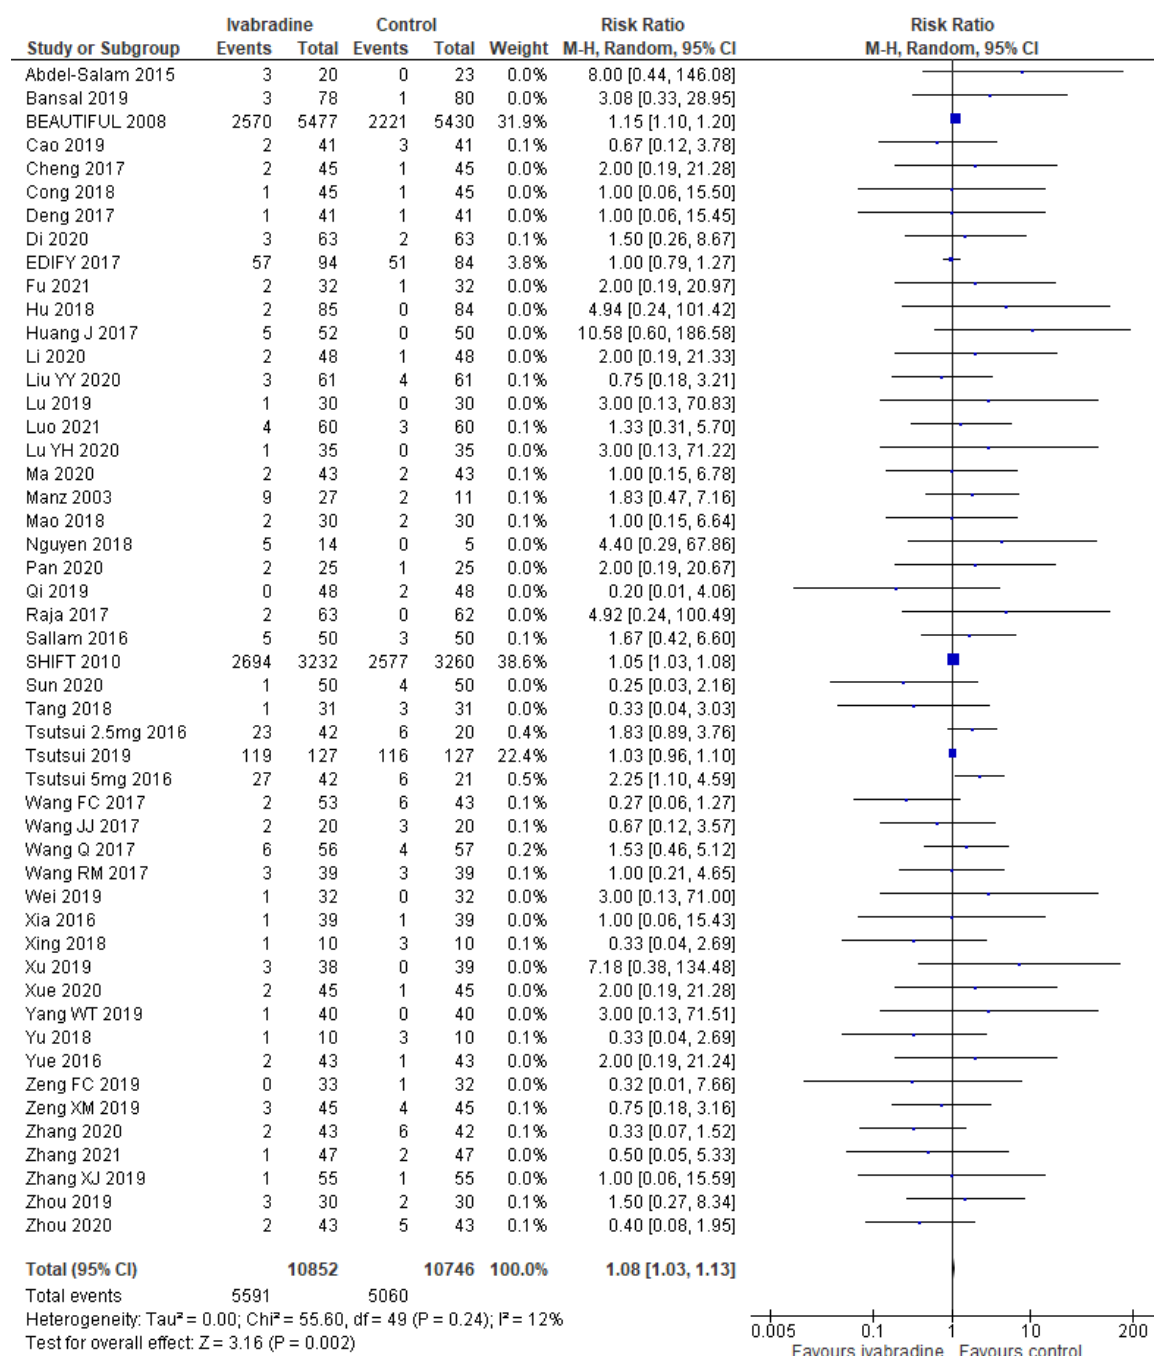

**Figure 60 - Forest plot of the meta-analysis of non-serious adverse events using random-effects meta-analysis.** The meta-analysis showed evidence of a harmful effect of ivabradine versus control (placebo or no intervention)

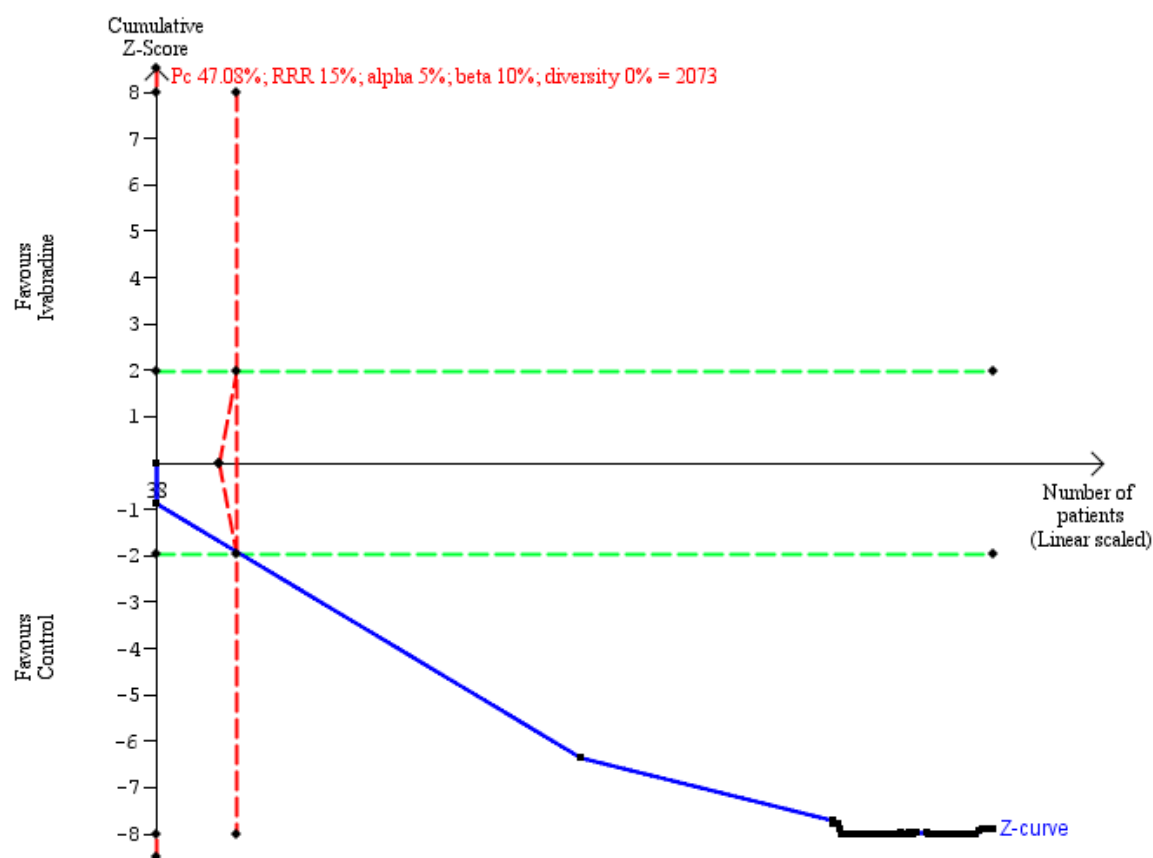

**Figure 61 – Trial Sequential Analysis graph of non-serious adverse events.** Trial Sequential Analysis showed that we had enough information to detect a relative risk increase of 10% by ivabradine versus control (placebo or no intervention). The cumulative z-curve (the blue line) reached the required information size and crossed the conventional boundary of statistical significance. Pc: prevalence in control group; RRR: relative risk ratio.

## Sensitivity analyses

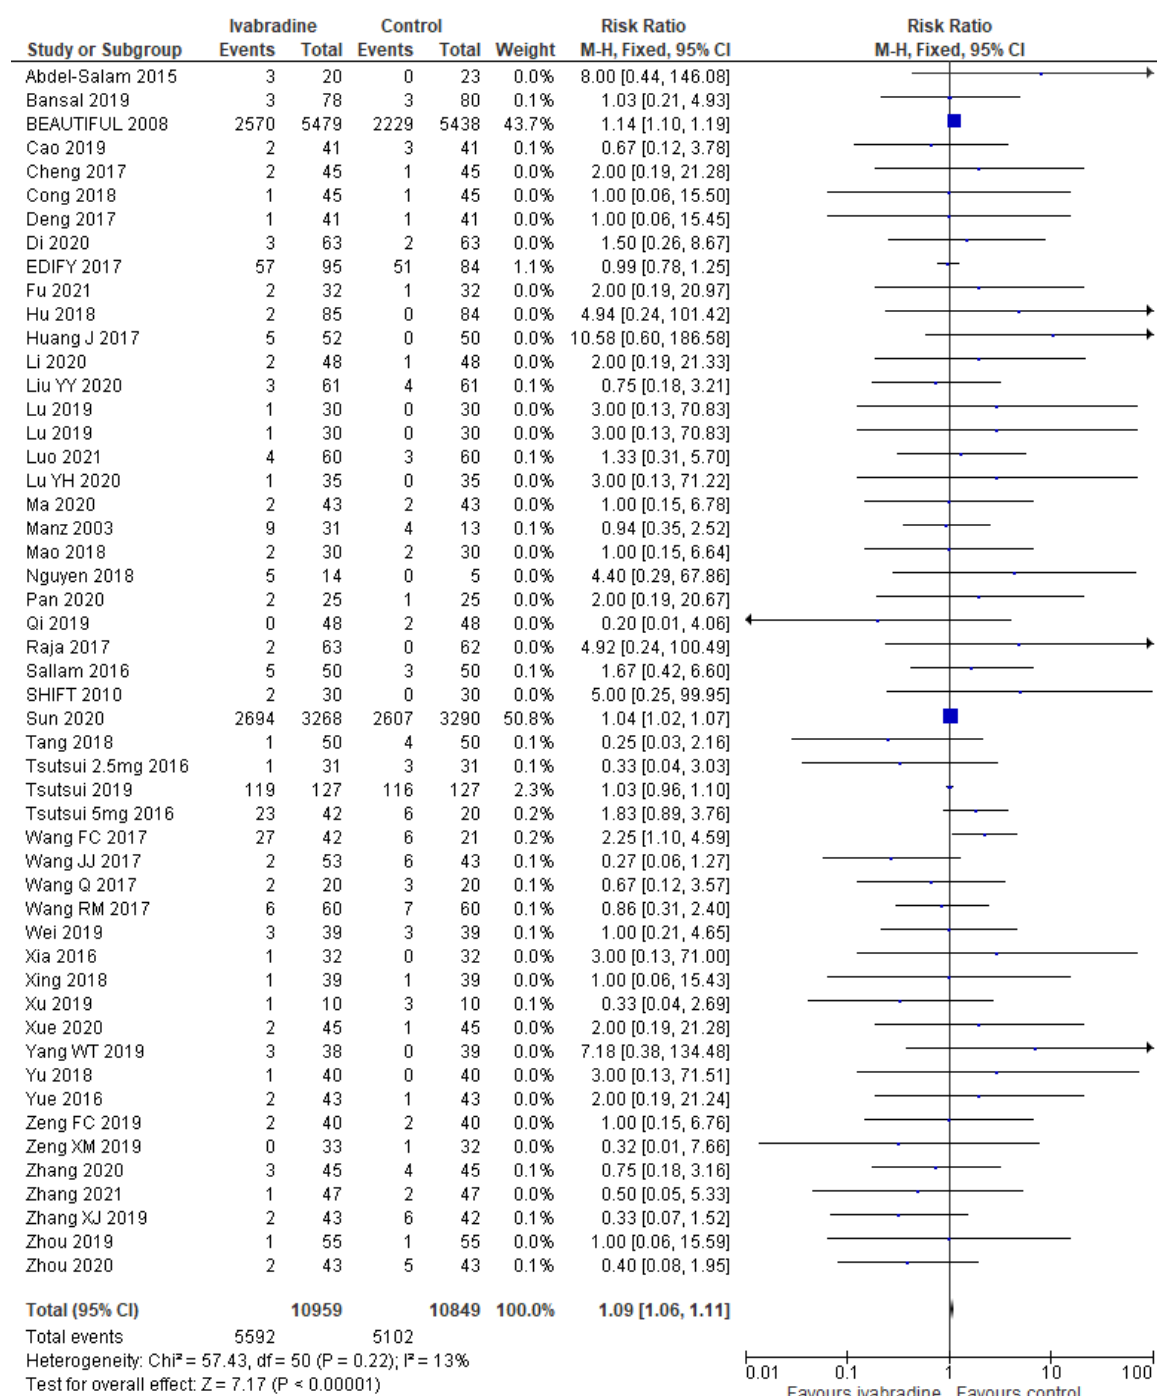

Figure 62 – Forest plot of the meta-analysis of non-serious adverse events using a best- compared with worst-case scenario.

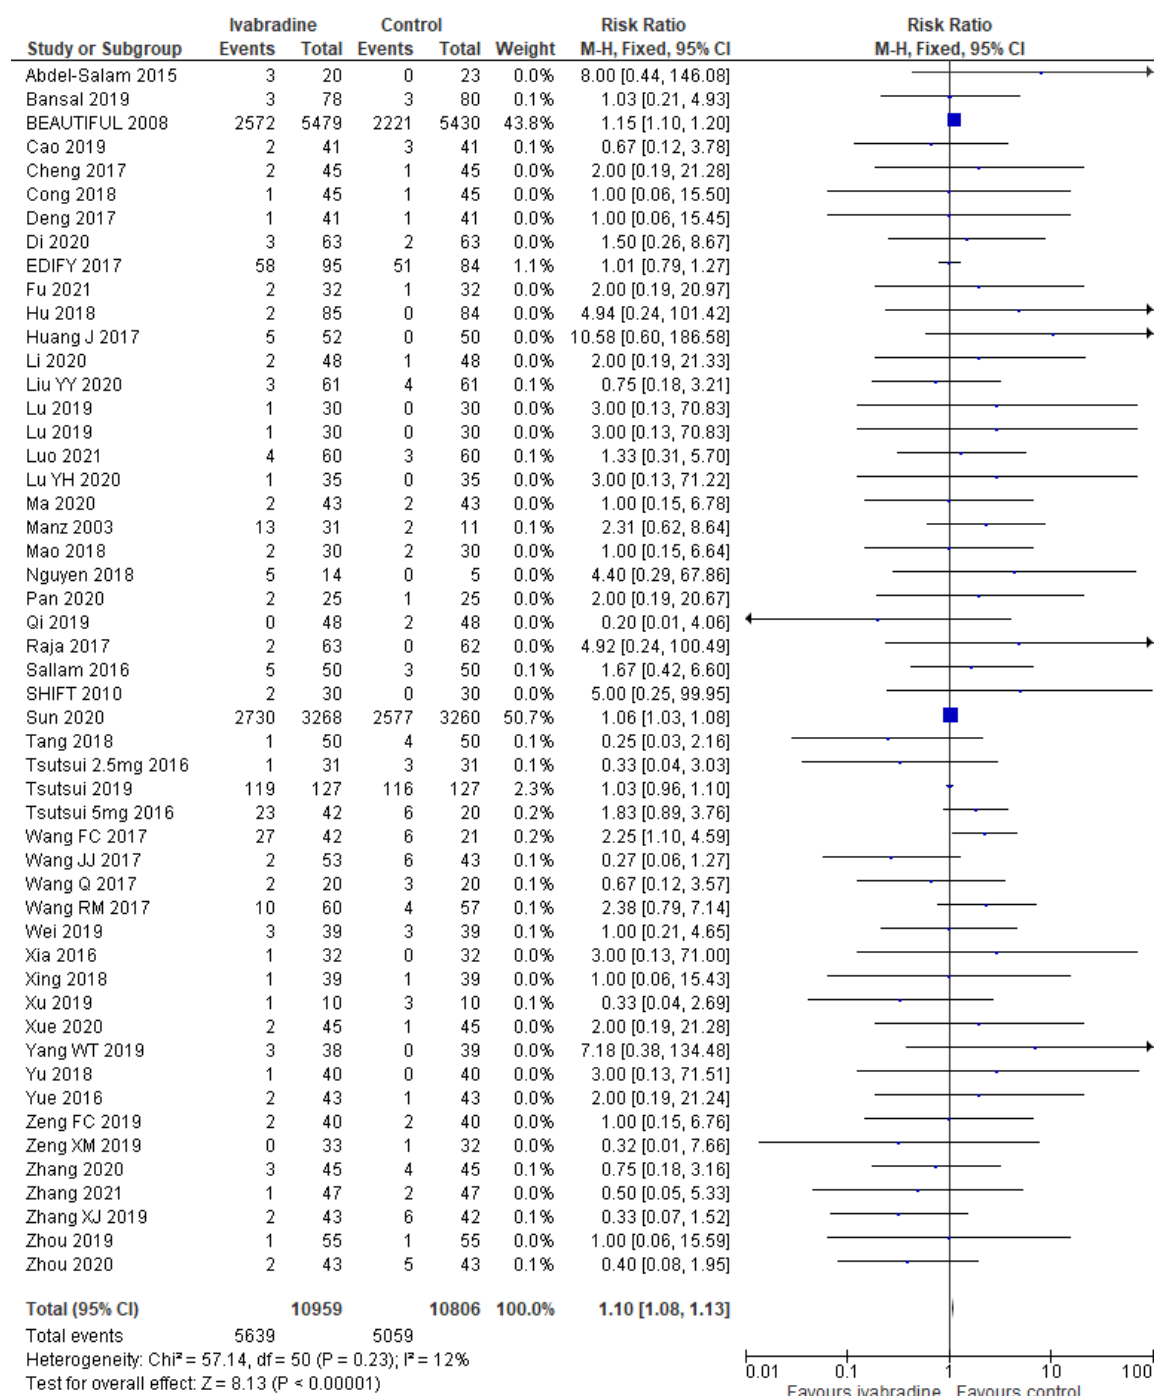

Figure 63 - Forest plot of the meta-analysis of non-serious adverse events using a worst- compared with best-case scenario.

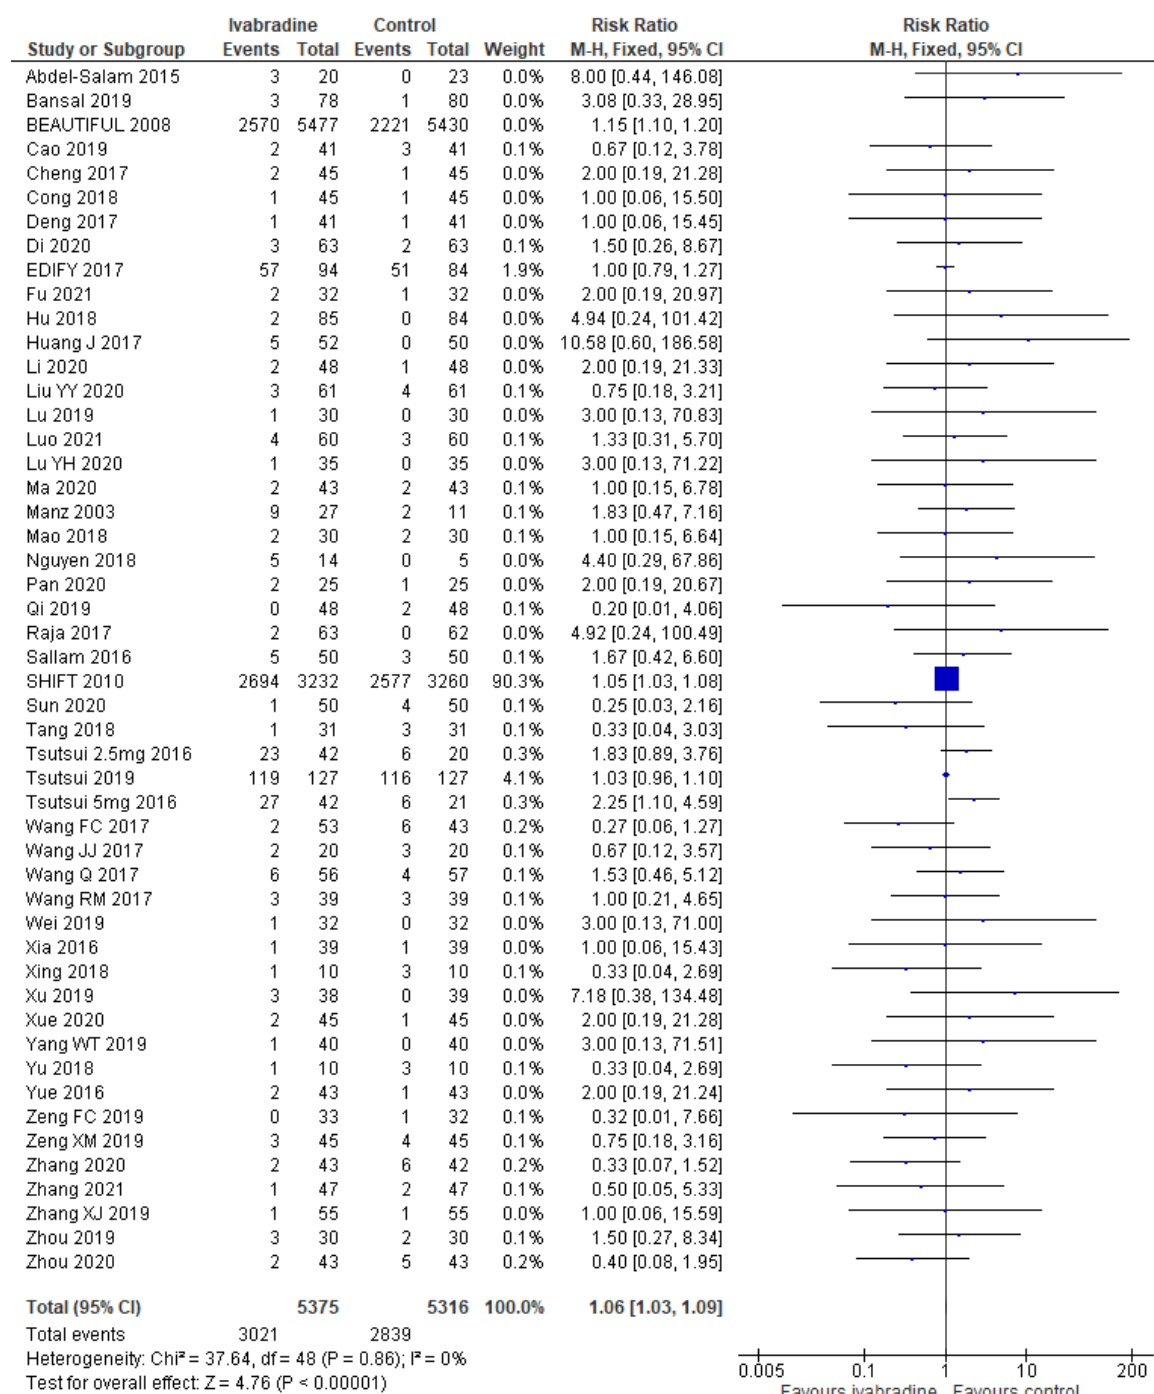

Figure 64 – Forest plot of the sensitivity analysis of non-serious adverse events removing the BEAUTIFUL trial.

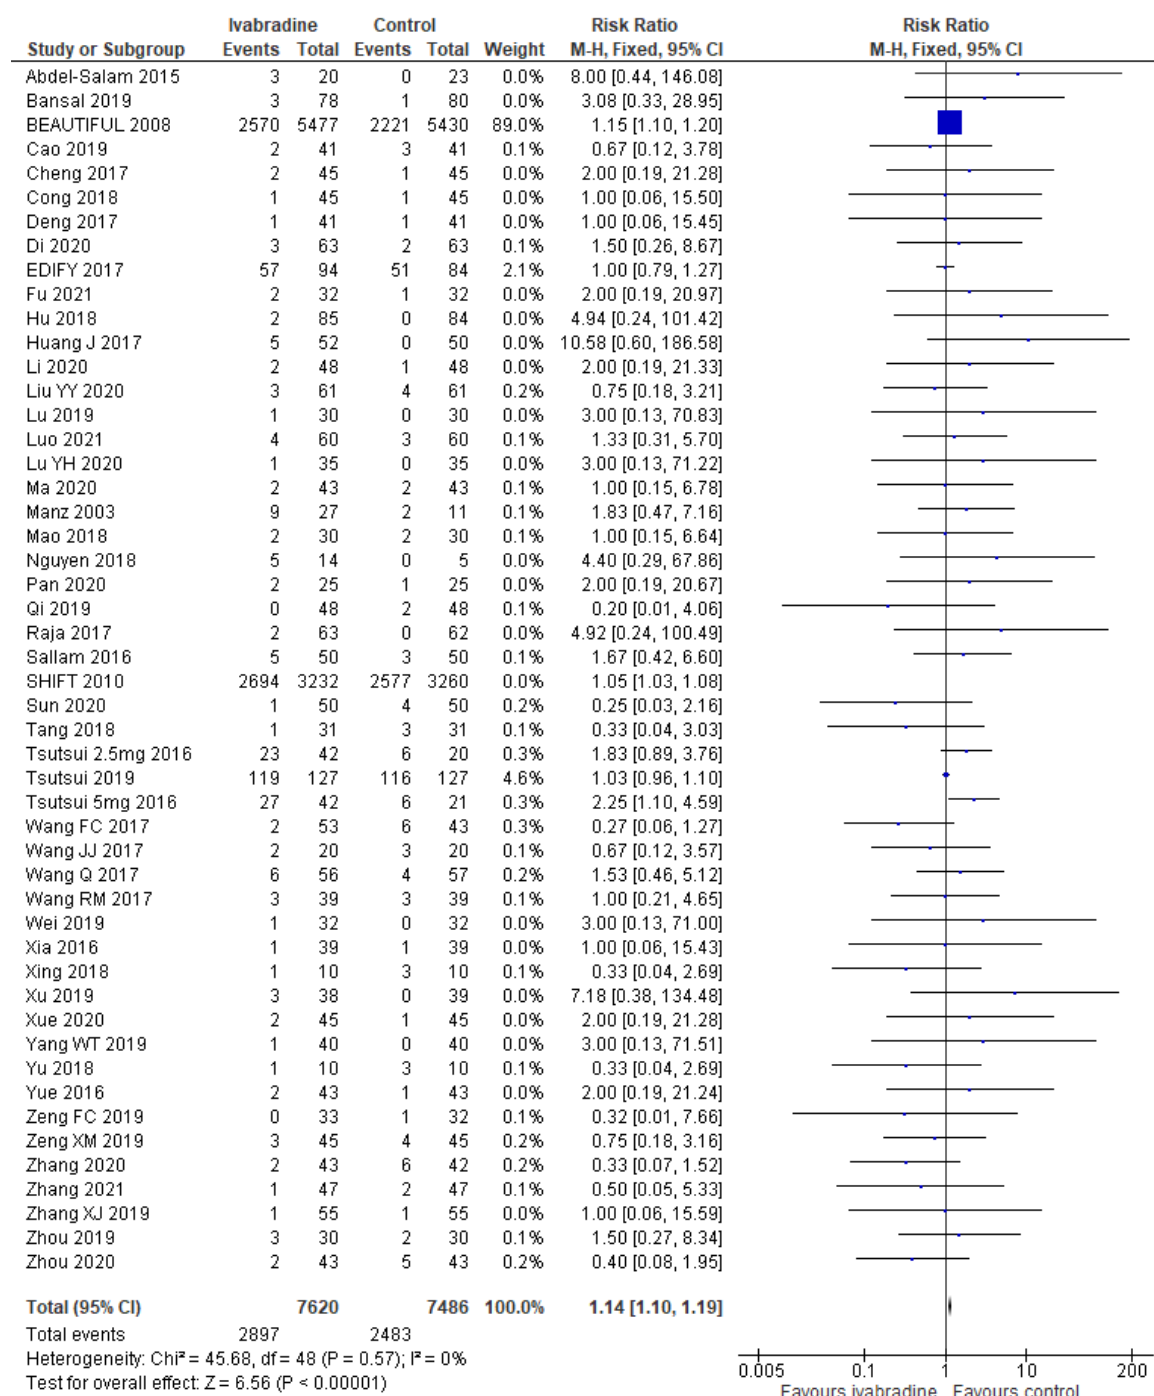

Figure 65 – Forest plot of the sensitivity analysis of non-serious adverse events removing the SHIFT trial.



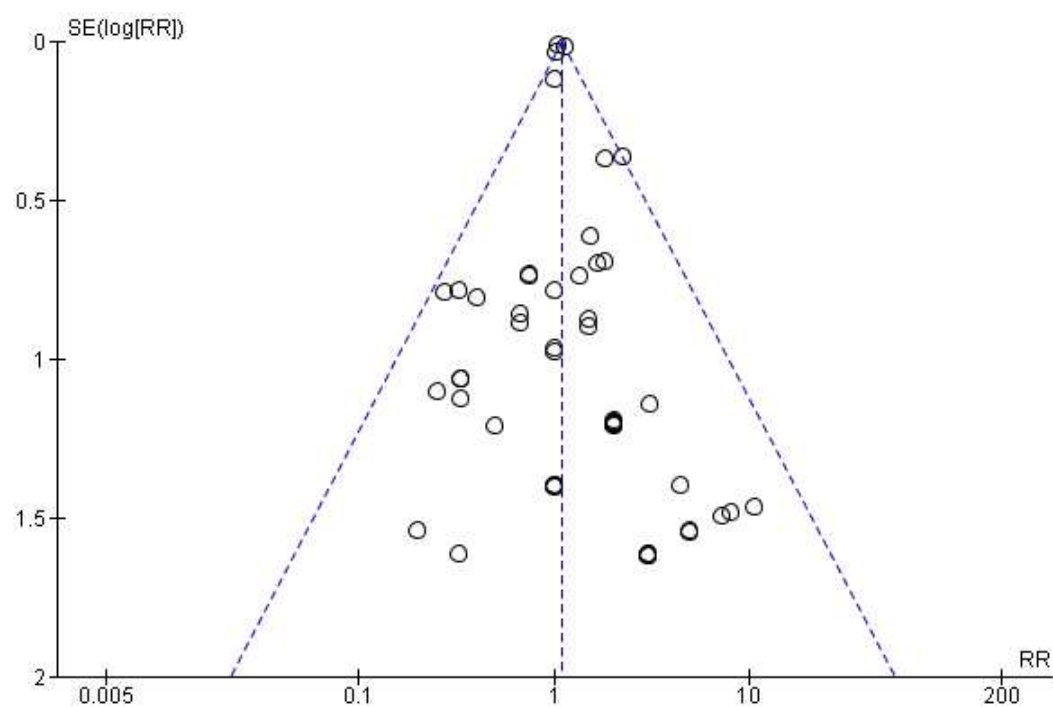

**Figure 66 – Funnel plot of the analysis of non-serious adverse events.** The funnel plot did not indicate small study bias.

## Supplement 11 – Discrepancy in safety data

For serious and non-serious adverse events, there were discrepancies between the data reported in the publication in the SHIFT trial as compared to the raw data reported on ClinicalTrials.gov.

In the published article of the SHIFT trial, it was reported that 1450/3232 (44.86%) participants in the ivabradine group and 1553/3260 (47.6%) in the control group experienced one or more serious adverse events. However, in the raw data it was reported that 1369/3232 (42.4%) in the ivabradine group versus 1481/3260 (45.4%) in the control group experienced one or more serious adverse events. In our analyses, we have used the highest proportion of participants at risk.

In the published article of the SHIFT trial it was reported that 2439/3232 (75.5%) participants in the ivabradine group and 2423/3260 (74.3%) in the control group experienced one or more non-serious adverse events. However, in the raw data it was reported that 2062/3232 (63.8%) in the ivabradine group versus 2020/3260 (62.0%) in the control group experienced one or more non-serious adverse events. In our analyses, we have used the highest proportion of participants at risk. The company that developed ivabradine, Servier, has informed us that in the publication, the data given for serious and non-serious adverse events ‘are given during the study’ while the data on ClinicalTrials.gov ‘are given on treatment’.

## Supplement 12 – Exploratory outcomes

### Resting heart rate at follow-up

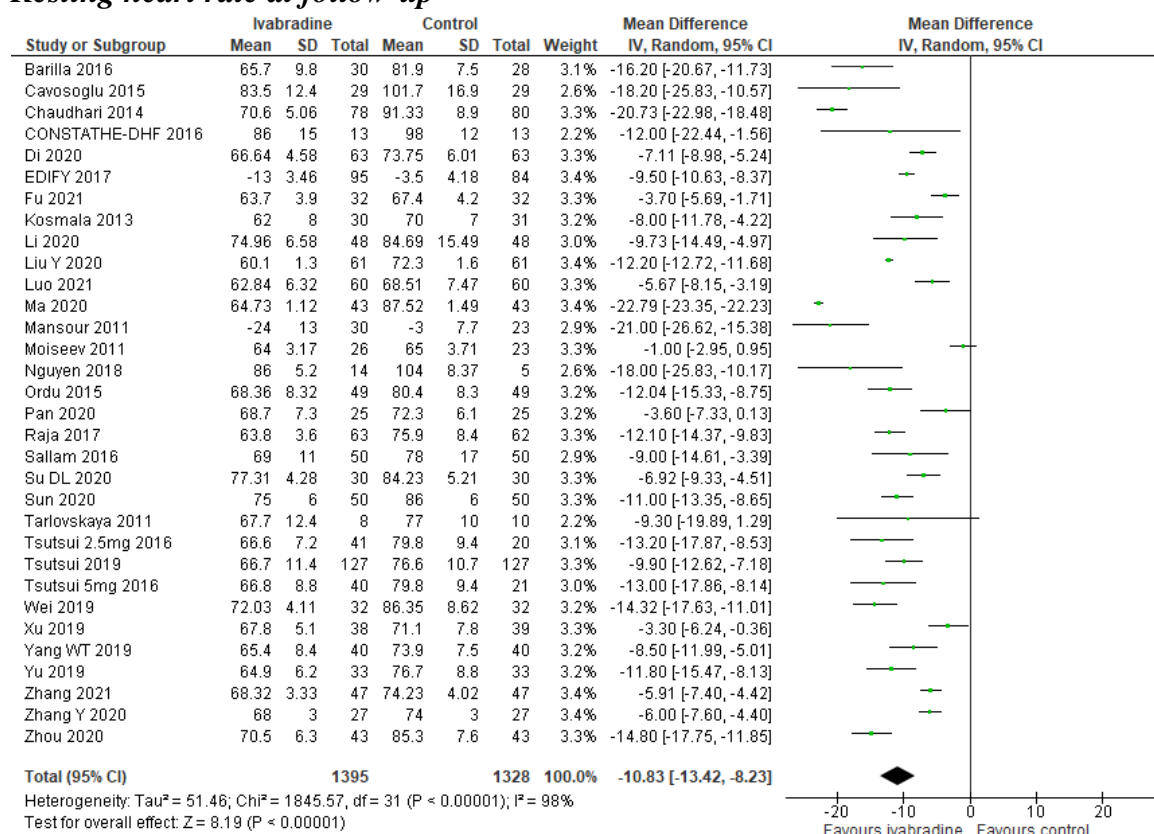

**Figure 67 – Forest plot of the meta-analysis of resting heart rate at follow-up using random-effects meta-analysis.** The meta-analysis showed that ivabradine seemed to decrease the resting heart rate at follow-up by 10.83 beats per minute at follow-up.

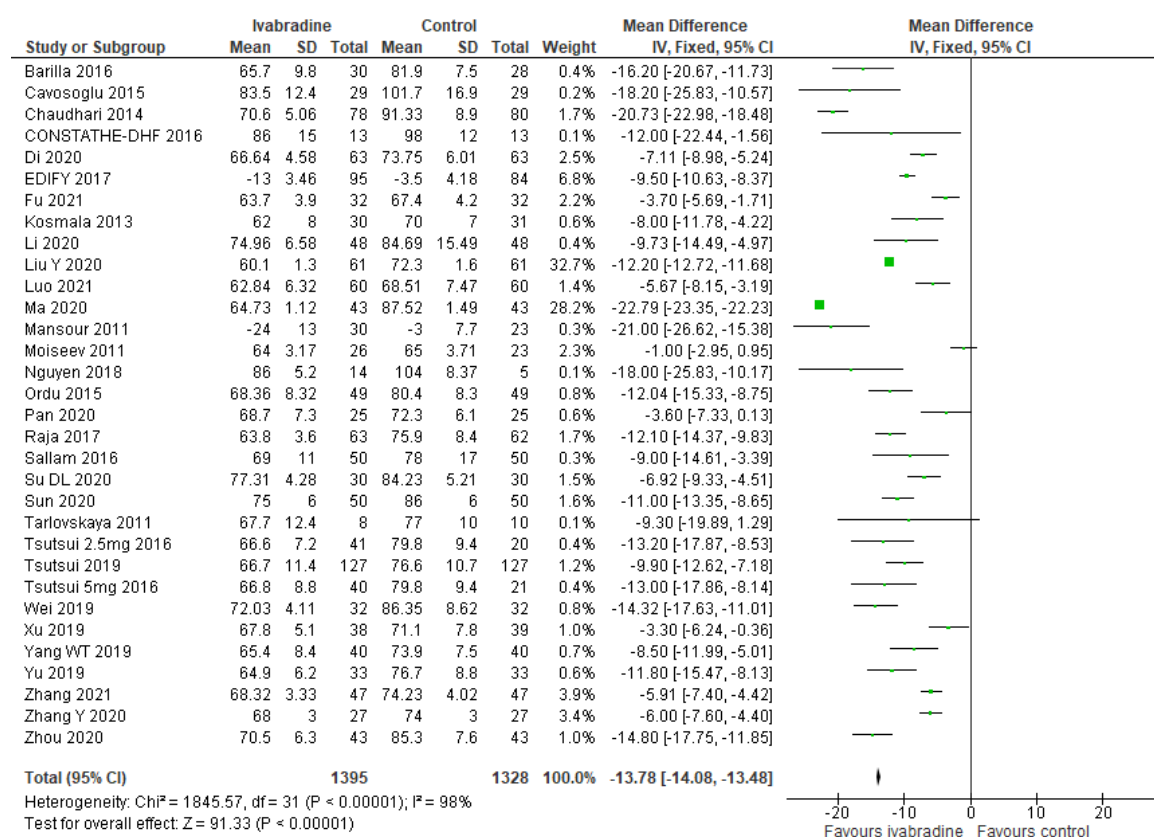

**Figure 68 - Forest plot of the meta-analysis of resting heart rate at follow-up using fixed-effect meta-analysis.** The meta-analysis showed that ivabradine seemed to decrease the resting heart rate at follow-up by 13.78 beats per minute at follow-up.

***Left ventricular ejection fraction***

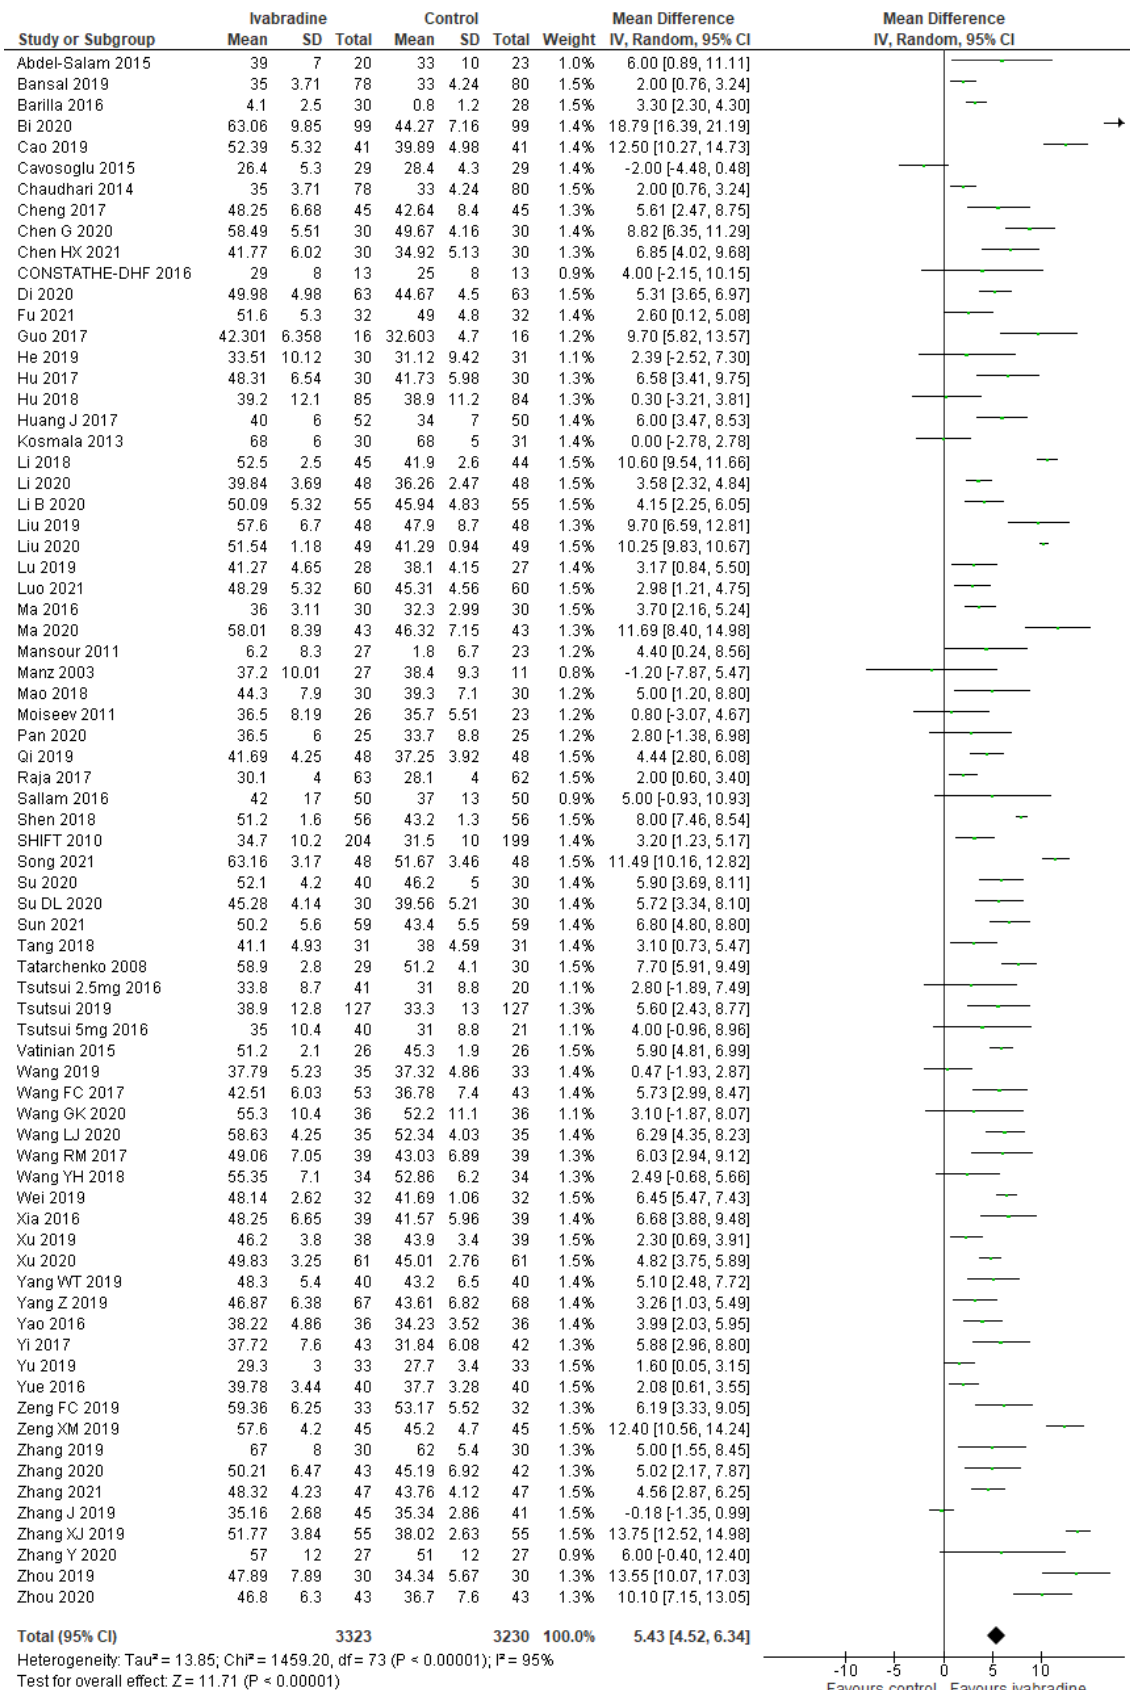

**Figure 69 - Forest plot of the meta-analysis of left ventricular ejection fraction using random-effects meta-analysis.** The meta-analysis showed that ivabradine seemed to increase the left ventricular ejection fraction by 5.43%.

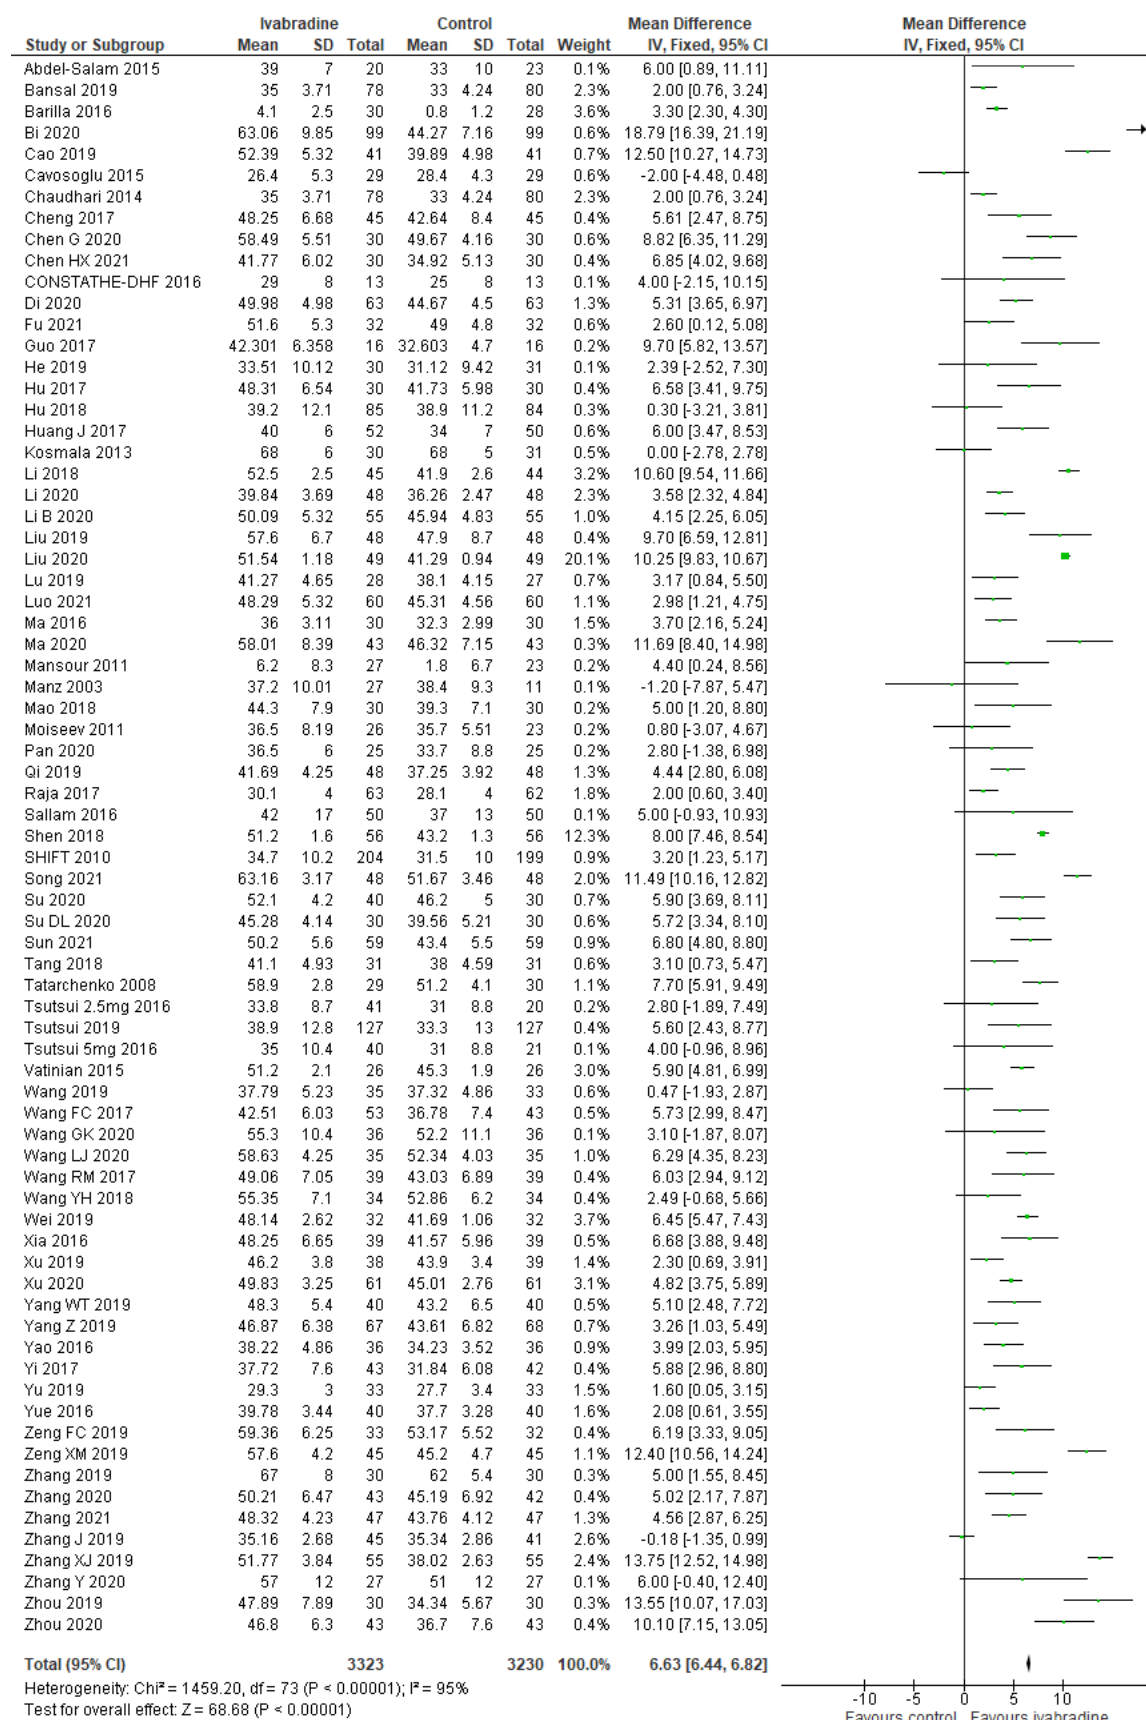



**Figure 70 - Forest plot of the meta-analysis of left ventricular ejection fraction using fixed-effect meta-analysis.** The meta-analysis showed that ivabradine seemed to increase the left ventricular ejection fraction by 6.63%.

***Hospitalisation during follow-up***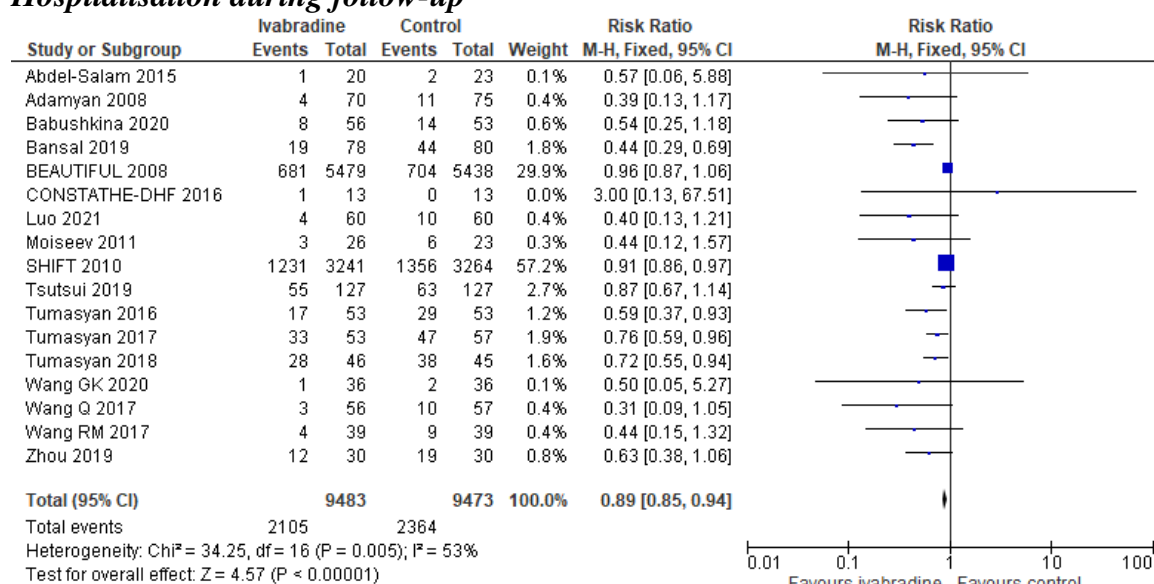

**Figure 71 – Forest plot of the meta-analysis of hospitalisation during follow-up using fixed-effect meta-analysis.** The meta-analysis showed evidence of a beneficial effect ivabradine versus control (placebo or no intervention) of a risk ratio of 0.89.

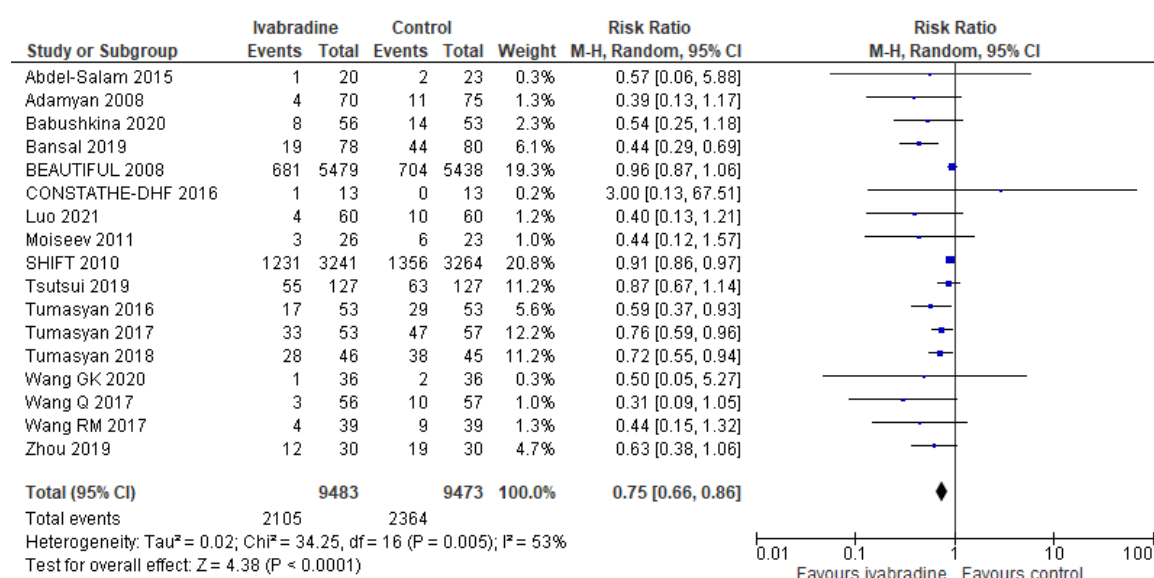

**Figure 72 - Forest plot of the meta-analysis of hospitalisation during follow-up using random-effects meta-analysis.** The meta-analysis showed evidence of a beneficial effect of ivabradine versus control (placebo or no intervention) of a risk ratio of 0.75.

**6-minutes walking distance**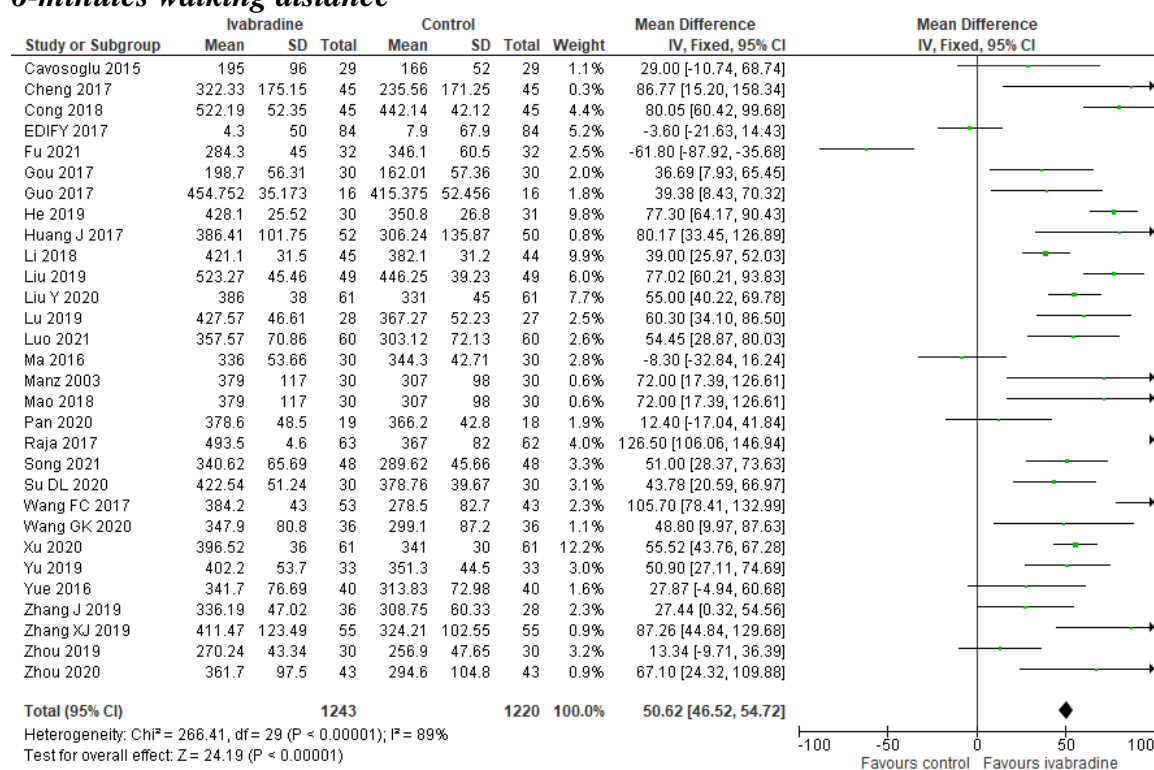

**Figure 73 – Forest plot of the meta-analysis of 6-minutes walking distance using fixed-effect meta-analysis.** The meta-analysis showed evidence of a beneficial effect of ivabradine versus control (placebo or no intervention) of 50.62 meters per 6 minutes.

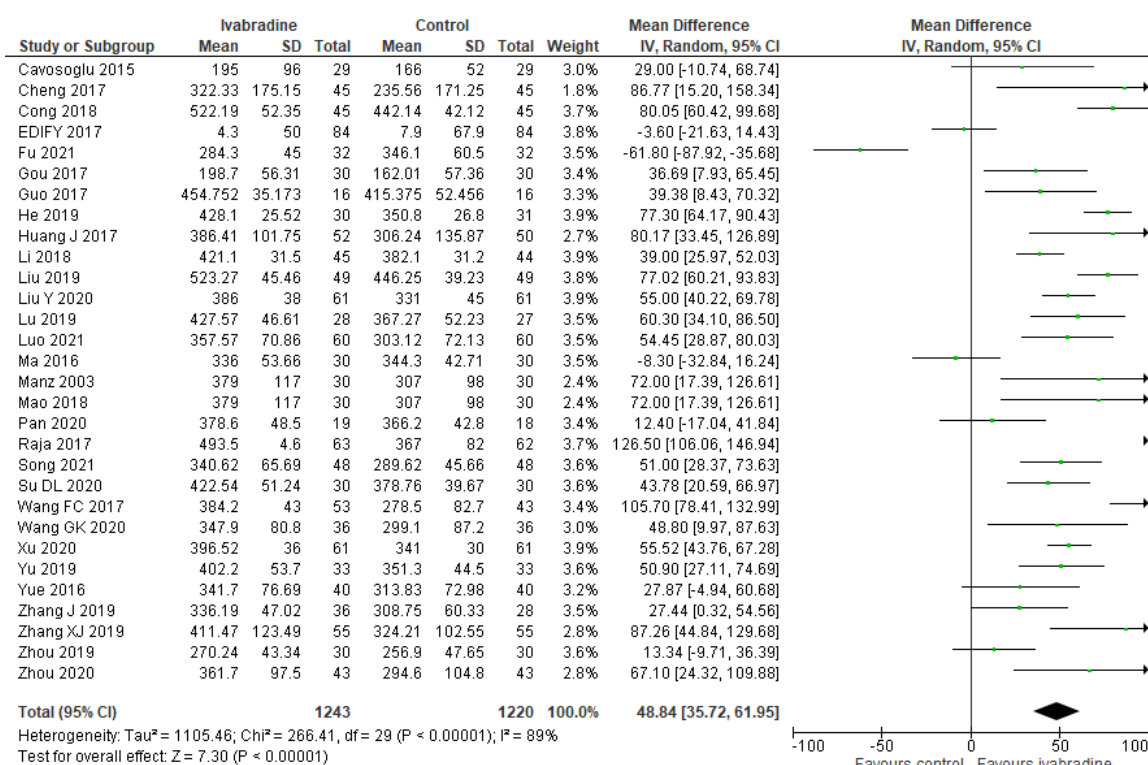

**Figure 74 – Forest plot of the meta-analysis of 6-minutes walking distance using random-effects meta-analysis.** The meta-analysis shows evidence of a beneficial effect of ivabradine versus control (placebo or no intervention) of 48.84 meters per 6 minutes.
